# Supplementary material
Source: publisher figshare collection journal article supplement (https://acs.figshare.com/ndownloader/files/17938631)
Supplement: Supplementary file 1 [file 17938631]

## Supporting Information

### **Synthesis and Activation of Bench-Stable 3a-Fluoropyrroloindolines as Latent Electrophiles for the Synthesis of C-2-Thiol-substituted Tryptophans and C-3a-substituted Pyrroloindolines**

Alla Pryyma, Yong Jia Bu, Yonnie Wai, Brian O. Patrick, and David M. Perrin\*

*Department of Chemistry, University of British Columbia, 2036 Main Mall, Vancouver, B.C., V6T 1Z1, Canada*

## Table of Contents

|                                                                                                                                                                                          |    |
|------------------------------------------------------------------------------------------------------------------------------------------------------------------------------------------|----|
| Materials and Methods .....                                                                                                                                                              | 3  |
| General Fluorocyclization Procedure for Compounds <b>3-8a,b</b> .....                                                                                                                    | 3  |
| Numbering Systems and Remarks on Characterization of Fluoropyrroloindoline Compounds .....                                                                                               | 3  |
| <b>Figure S1.</b> Characteristic Multiplicity of <sup>19</sup> F-NMR Signals of <i>anti-cis</i> and <i>syn-cis</i> Diastereomers (compounds <b>6b</b> and <b>6a</b> , respectively)..... | 4  |
| <b>Table S1.</b> Description of Diastereomeric <b>2-8a,b</b> in Crude, Isolated, and Characterized Forms .....                                                                           | 5  |
| Synthesis and characterization of compound <b>2a,b</b> .....                                                                                                                             | 6  |
| Synthesis and characterization of compound <b>3a,b</b> .....                                                                                                                             | 9  |
| Synthesis and characterization of compound <b>4a,b</b> .....                                                                                                                             | 15 |
| Synthesis and characterization of compound <b>5a,b</b> .....                                                                                                                             | 21 |
| Synthesis and characterization of compound <b>6a,b</b> .....                                                                                                                             | 25 |
| Synthesis and characterization of compound <b>7a,b</b> .....                                                                                                                             | 31 |
| Synthesis and characterization of compound <b>8a,b</b> .....                                                                                                                             | 34 |
| Synthesis and characterization of compound <b>9</b> .....                                                                                                                                | 37 |
| Synthesis and characterization of compound <b>10</b> .....                                                                                                                               | 40 |
| Synthesis and characterization of compound <b>11</b> .....                                                                                                                               | 43 |
| Synthesis and characterization of compound <b>12</b> .....                                                                                                                               | 46 |
| Procedures for <b>Table 1, Entries 1 – 8</b> .....                                                                                                                                       | 49 |
| Synthesis and characterization of compound <b>13a,b</b> .....                                                                                                                            | 50 |
| Synthesis and characterization of compound <b>14a,b</b> .....                                                                                                                            | 56 |
| Synthesis and characterization of compound <b>15a,b</b> .....                                                                                                                            | 62 |
| Synthesis and characterization of compound <b>16a,b</b> .....                                                                                                                            | 68 |
| Synthesis and characterization of compound <b>17a,b</b> .....                                                                                                                            | 74 |
| Synthesis and characterization of compound <b>18a,b</b> .....                                                                                                                            | 79 |
| Synthesis and characterization of compound <b>19</b> .....                                                                                                                               | 85 |
| Attempted synthesis of <b>20-22a,b</b> .....                                                                                                                                             | 91 |
| References .....                                                                                                                                                                         | 92 |
| Crystal Structure of compound <b>2b</b> : Data and Experimental .....                                                                                                                    | 93 |

## Materials and Methods

**General Information.** Reactions were performed in flame-dried borosilicate round-bottom flasks fitted with a rubber septum under a positive pressure of Ar, unless otherwise noted. Air/moisture sensitive liquids and solutions were transferred via syringe under positive Ar pressure. Controlled temperature reactions were performed using a mineral oil bath and a temperature controlled hot plate (Corning, PC 420D). Analytical thin layer chromatography (TLC) was performed using pre-coated Merck aluminum backed silica gel plates (Silica gel 60 F254). Visualization was achieved using ultraviolet light (254 nm) and chemical staining with silica gel impregnated with iodine, *p*-anisaldehyde, potassium permanganate, bromocresol green, and ninhydrin as appropriate. Flash column chromatography purification was performed using silica gel 60 (230-400 mesh, Silicycle, Quebec, Canada and 230-400 mesh, high purity 9385, Sigma Aldrich, Germany). Prior to use, silica gel was washed with four volumes of ammonium hydroxide/dichloromethane/ethanol (0.5:4:4.5) solution, filtered, and baked to neutralize small amounts of acid on silica gel. Solvents were dried according to standard methods.<sup>1</sup> Reagents and solvents were purchased from Sigma-Aldrich, Novabiochem, Alfa Aesar, Acros Organics, AK Scientific Inc., Oakwood Chemical, TCI America and used without further purification unless noted otherwise. Dipeptide substrates for fluorocyclization were synthesized following reported procedures: N-Tr-Trp-Gly-OMe,<sup>2</sup> N-Fmoc-Trp-Gly-OMe,<sup>3</sup> N-Boc-Trp-Gly-OMe.<sup>4</sup>

**Instrumentation.** <sup>1</sup>H, <sup>19</sup>F, <sup>13</sup>C, and 2D NMR spectra were recorded on Bruker Avance 300 (300 MHz), Bruker Avance 400dir (400 MHz), Bruker Avance 400inv (400 MHz), and Bruker Avance 600-CRP (600 MHz) spectrometers. Chemical shifts ( $\delta$ ) are reported in ppm and referenced to the appropriate residual solvent peaks (acetone-D<sub>6</sub>, CD<sub>3</sub>CN, CD<sub>2</sub>Cl<sub>2</sub>, or CDCl<sub>3</sub>). Low-resolution mass spectrometry (LRMS) in Electrospray Ionization (ESI) mode was obtained using Waters ZQ mass spectrometer equipped with ESCI ion source and Waters 2695 HPLC. High-resolution mass spectrometry (HRMS) in ESI mode was obtained using Water/Micromass LCT-TOF mass spectrometer equipped with ESI ion source. The X-Ray crystallographic measurements were performed on a Bruker APEX DUO diffractometer with a TRIUMPH curved-crystal monochromator with Mo-K $\alpha$  radiation. Infrared (IR) spectra (cm<sup>-1</sup>) was recorded neat using PerkinElmer FT-IR Frontier Spectrometer.

## General Fluorocyclization Procedure for Compounds 3-8a,b

A flame-dried round bottom flask under positive Ar atmosphere was charged with the corresponding tryptophan analog dissolved in anhydrous dichloromethane (DCM) to reach a final concentration of 0.05-0.1 M with respect to the corresponding tryptophan analog. To this solution, added 1-fluoro-2,4,6-trimethylpyridinium triflate (1.8 equiv). The reaction contents were stirred for 3 h at 21 °C and the reaction progress was followed by TLC. Upon completion the crude was concentrated under reduced pressure and immediately purified using silica gel flash column chromatography. <sup>19</sup>F-NMR spectroscopy on the crude reaction was used to determine the diastereomeric ratios (*syn-cis*:*anti-cis*).

## Numbering Systems and Remarks on Characterization of Fluoropyrroloindoline Compounds

a) indole core numbering system

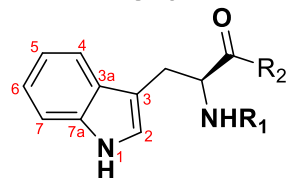

b) pyrroloindoline core numbering system

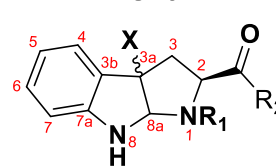

Diastereomeric assignments for compounds **5a,b** and **6a,b** were done based on the characteristic  $^1\text{H}$ -NMR proton chemical shift of -OMe ester group. Due to the geometry of the *anti-cis* diastereomer -OMe group is shielded by the aromatic ring resulting in an upfield shift ( $\sim 3$  ppm), whereas *syn-cis* does not experience the shielding effect of the aromatic ring and proton chemical shift of the -OMe appears in a characteristic range for esters ( $\sim 3.5$ - $3.7$  ppm).<sup>5-7</sup> During the course of this study it was also discovered that Fmoc- and Boc-protected fluoropyrroloindolines exhibit characteristic  $^{19}\text{F}$ -signal shapes. Upon inspection, it was determined that multiplet  $^{19}\text{F}$ -signal of the *syn-cis* diastereomer resembles a quartet and the multiplet  $^{19}\text{F}$ -signal of the *anti-cis* resembles a triplet (see below an example from N-Boc-fluoropyrroloindoline-OMe **6a** and **6b**). Diastereomeric assignment of **4a,b**, **7-8a,b** were determined based on the characteristic splitting pattern in  $^{19}\text{F}$ -NMR (**Figure S1**). Due to the presence of two rotamers, both diastereomers of compounds **3-8ab** exhibited an additional set of signals in  $^1\text{H}$ ,  $^{19}\text{F}$ ,  $^{13}\text{C}$ -NMR; this phenomenon has been previously documented for 3a-fluoropyrroloindolines.<sup>5, 8</sup> The ratio of rotamers was found to change depending on the NMR solvent used; in the case of compound **4a**, in  $\text{CD}_2\text{Cl}_2$  two rotamers appeared in a ratio of  $\sim 1.4:1$ , whereas in acetone- $\text{D}_6$  the ratio was 2.3:1 (determined by  $^{19}\text{F}$ -NMR). This observation also confirms that the observed signals are due to rotamer as opposed to epimers. To analyze  $^1\text{H}$ -spectra, -OMe of fluoropyrroloindoline compounds **3-6ab** were integrated to a cumulative value of 3H and the rest of the peaks were integrated with respect to this value. For compounds **7,8ab**, the  $^1\text{H}$ -spectra calibration was done using the upfield multiplet corresponding to  $\text{H}_2$ -3 (2H), which is well separated from other peaks, the rest of the peaks were integrated with respect to this multiplet. Note the characteristic 5-6 ppm range for H-8a in  $^1\text{H}$ -NMR; this signal was observed as a doublet with  $^3J_{\text{H-F}} \sim 20$  Hz for compounds **2b**, **3-8ab**. In  $^{13}\text{C}$ -NMR spectrum of **2-8a,b**,  $^1J_{\text{C-F}}$ ,  $^2J_{\text{C-F}}$ ,  $^3J_{\text{C-F}}$ ,  $^4J_{\text{C-F}}$  couplings were observed between F-atom and C3a, C8a, C3, C3b, C2, C4, C7a, C5, and C7. Variable temperature experiments were run for one of the fluoropyrroloindoline compounds (**4a,b**) in an attempt to observe a coalescence of both spectra due to the presence of rotamers; at two different temperatures, 45 and 72  $^\circ\text{C}$ , merging of rotamers was not observed.

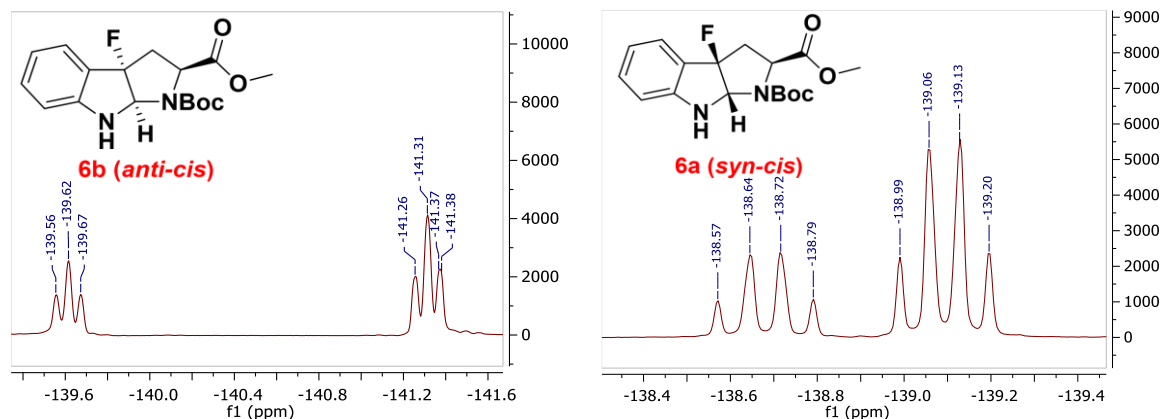

**Figure S1.** Characteristic Multiplicity of  $^{19}\text{F}$ -NMR Signals of *anti-cis* and *syn-cis* Diastereomers (compounds **6b** and **6a**, respectively)



**Table S1.** Description of Diastereomeric **2-8a,b** in Crude, Isolated, and Characterized Forms

| Compd       | Diastereomeric ratio based on <sup>19</sup> F-NMR spectrum acquired on crude reaction ( <i>syn-cis:anti-cis</i> ) | Diastereomeric ratio of isolate used for yield determination ( <i>syn-cis:anti-cis</i> ) | Full NMR Characterization performed on ( <i>syn-cis:anti-cis</i> )        |
|-------------|-------------------------------------------------------------------------------------------------------------------|------------------------------------------------------------------------------------------|---------------------------------------------------------------------------|
| <b>2a,b</b> | 1:10                                                                                                              | <i>anti-cis</i>                                                                          | <i>anti-cis</i> (major, <b>2b</b> )                                       |
| <b>3a,b</b> | 1.2:1                                                                                                             | 1:1                                                                                      | <i>syn-cis</i> (major, <b>3a</b> )<br>1:1 (mixture)                       |
| <b>4a,b</b> | 1.2:1                                                                                                             | 1.4:1                                                                                    | <i>syn-cis</i> (major, <b>4a</b> )<br>1.4:1 (mixture)                     |
| <b>5a,b</b> | 1.2:1                                                                                                             | 1.2:1                                                                                    | 1.2:1                                                                     |
| <b>6a,b</b> | 1.1:1                                                                                                             | 1.2:1                                                                                    | <i>syn-cis</i> (major, <b>6a</b> )<br><i>anti-cis</i> (minor, <b>6b</b> ) |
| <b>7a,b</b> | 1.2:1                                                                                                             | 1.2:1                                                                                    | 1.2:1 (mixture)                                                           |
| <b>8a,b</b> | 1.1:1                                                                                                             | 1.4:1                                                                                    | 1.4:1 (mixture)                                                           |

## Synthesis and characterization of compound **2a,b**

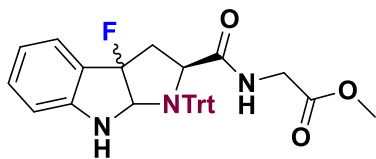

**2a,b** (1:10)<sup>b</sup> 47 %

**Chemical Formula:** C<sub>33</sub>H<sub>30</sub>FN<sub>3</sub>O<sub>3</sub>

**Exact Mass:** 535.23

**Molecular Weight:** 535.62

**Methyl ((2S)-3a-fluoro-1-trityl-1,2,3,3a,8,8a-hexahydropyrrolo[2,3-b]indole-2-carbonyl)glycinate, N-Trt-FPI-Gly-OMe (**2a,b**).** A flame-dried round bottom flask under positive Ar atmosphere was charged with 1-fluoro-2,4,6-trimethylpyridinium triflate (2.15 eq., 144.3 mg, 0.499 mmol) in dichloromethane (DCM) (6.18 mL) and pH 6, 0.5 M citrate buffer (3.1 mL), followed by N-Trt-Trp-Gly-OMe (1 eq., 120 mg, 0.232 mmol). The reaction contents were stirred at 21 °C for 1.5 h and then another portion of 1-fluoro-2,4,6-trimethylpyridinium triflate (2.15 eq., 144 mg, 0.50 mmol) was added and the reaction was stirred for 18.5 h at 21 °C. The DCM layer (light orange and clear) was separated and concentrated under reduced pressure. The crude residue was immediately purified using silica gel (NH<sub>4</sub>OH treated and baked to neutralize small amounts of acid on silica gel, see general procedures) flash column chromatography (isocratic elution at 0.4/15/84.5 triethylamine/hexane/ethyl acetate) to afford pure *anti-cis* N-Trt-FPI-Gly-OMe **2a,b** (57 mg, 0.10 mmol, 47% yield) as a crystalline white solid. The product was crystallized out of hexane/ethyl acetate (3/1) as clear needle-like crystals. <sup>19</sup>F-NMR spectroscopy on the crude reaction mixture was used to determine the diastereomeric ratio of 10:1 (*anti-cis*:*syn-cis*), major diastereomer **2b** was isolated and characterized.

**<sup>1</sup>H NMR** (300 MHz, Chloroform-*d*) major diastereomer, *anti-cis* δ (ppm) 9.10 (s, 1H), 7.70 – 7.63 (m, 5H), 7.39 – 7.27 (m, 6H), 7.28 – 7.07 (m, 6H), 6.79 (t, *J* = 7.5 Hz, 1H), 6.69 (d, *J* = 8.0 Hz, 1H), 5.59 (d, *J* = 22.5 Hz, 1H), 4.87 (s, 1H), 4.21 – 3.97 (m, 2H), 3.80 (s, 3H), 3.14 (dd, *J* = 18.3, 3.5 Hz, 1H), 2.33 (d, *J* = 13.3 Hz, 1H), 1.26 (td, *J* = 11.2, 10.1, 3.4 Hz, 1H).

**<sup>19</sup>F NMR** (282 MHz, Chloroform-*d*, ref. CFC<sub>3</sub> = 0 ppm) major diastereomer, *anti-cis* δ (ppm) -126.34 (dt, *J* = 44.0, 22.0 Hz).

**<sup>13</sup>C NMR** (101 MHz, Chloroform-*d*) major diastereomer, *anti-cis* δ (ppm) 41.39, 41.90 (d, *J* = 32.3 Hz), 52.42, 67.07 (d, *J* = 5.9 Hz), 78.96, 87.61 (d, *J* = 27.7 Hz), 110.39 (d, *J* = 195.5 Hz), 111.07 (d, *J* = 2.3 Hz), 121.03 (d, *J* = 3.1 Hz), 125.51, 126.98, 127.28 (d, *J* = 25.2 Hz), 128.44, 129.45, 131.54 (d, *J* = 3.6 Hz), 144.47, 149.75 (d, *J* = 4.4 Hz), 170.38, 174.00.

**HRMS** (ESI-TOF, *m/z*): [M+Na]<sup>+</sup> found 558.2171; calc. 558.2169 for C<sub>33</sub>H<sub>30</sub>FN<sub>3</sub>O<sub>3</sub>Na.

**TLC** (hexane:ethyl acetate 6:4 v/v): R<sub>f</sub> = 0.6 (UV, I<sub>2</sub>, p-anisaldehyde).

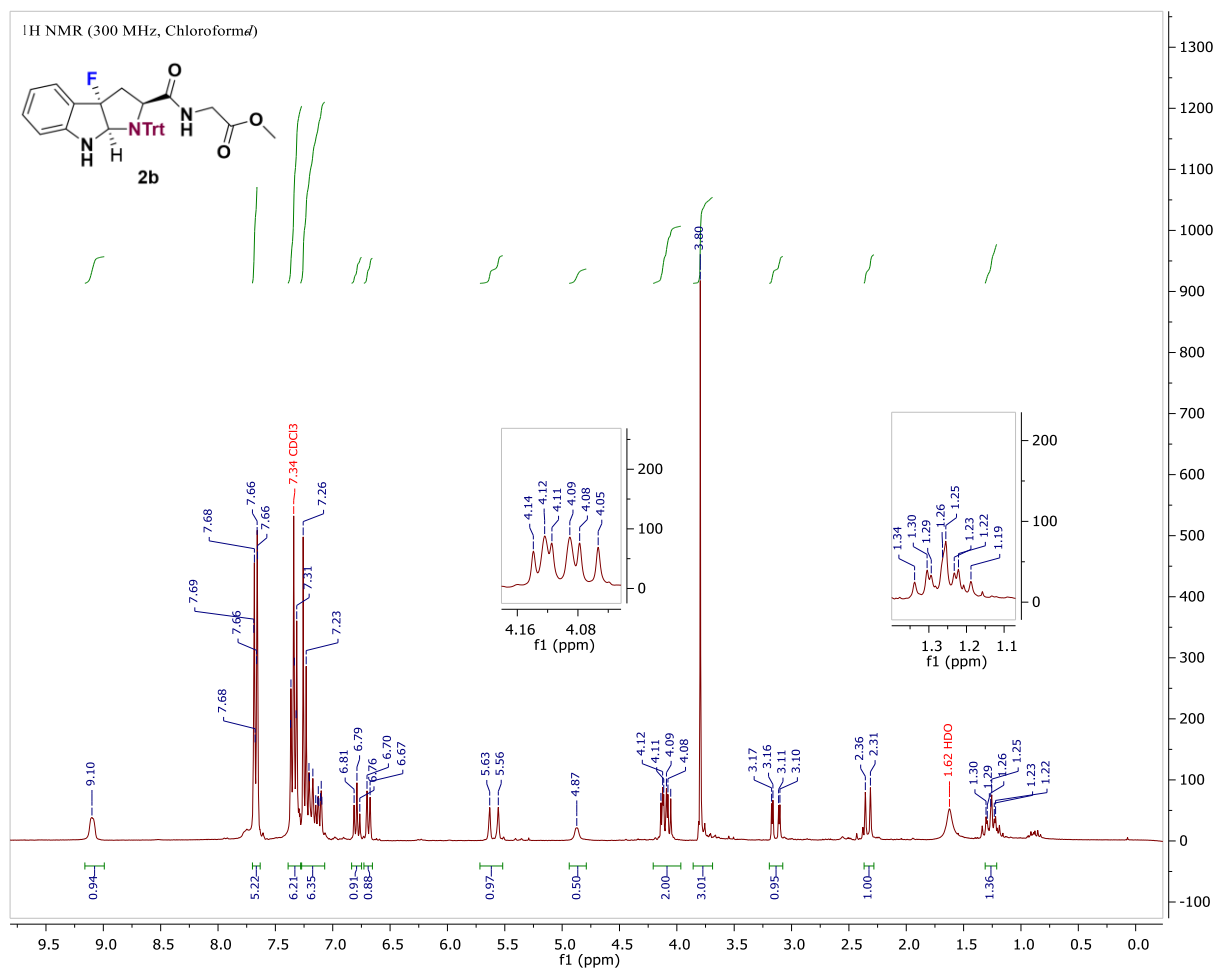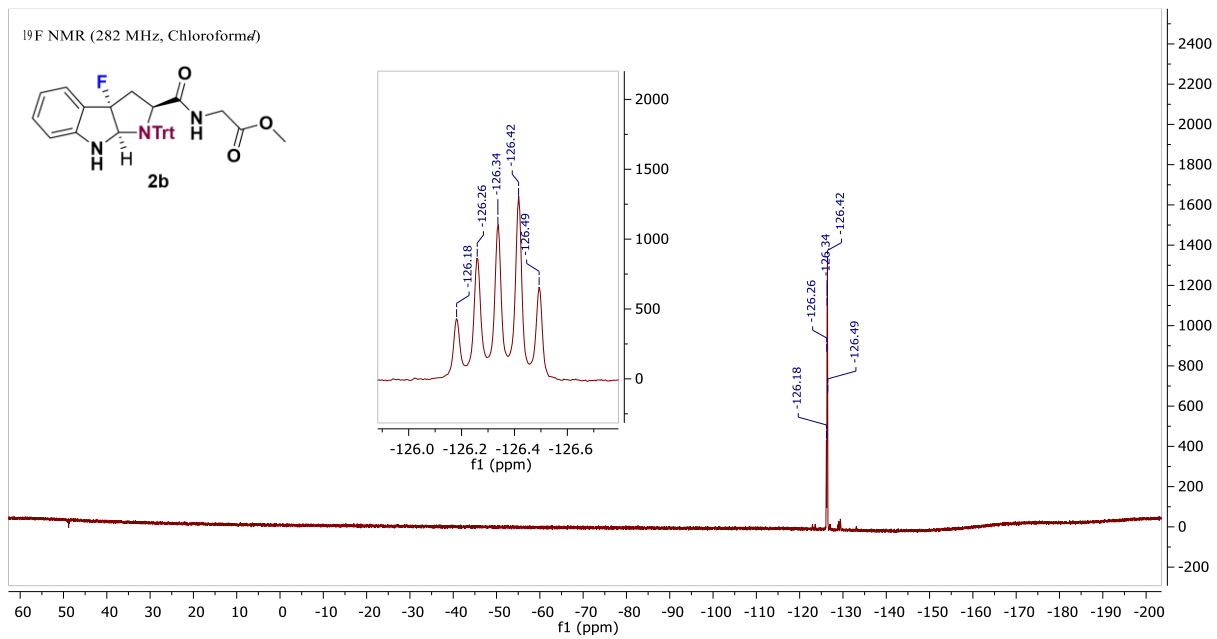

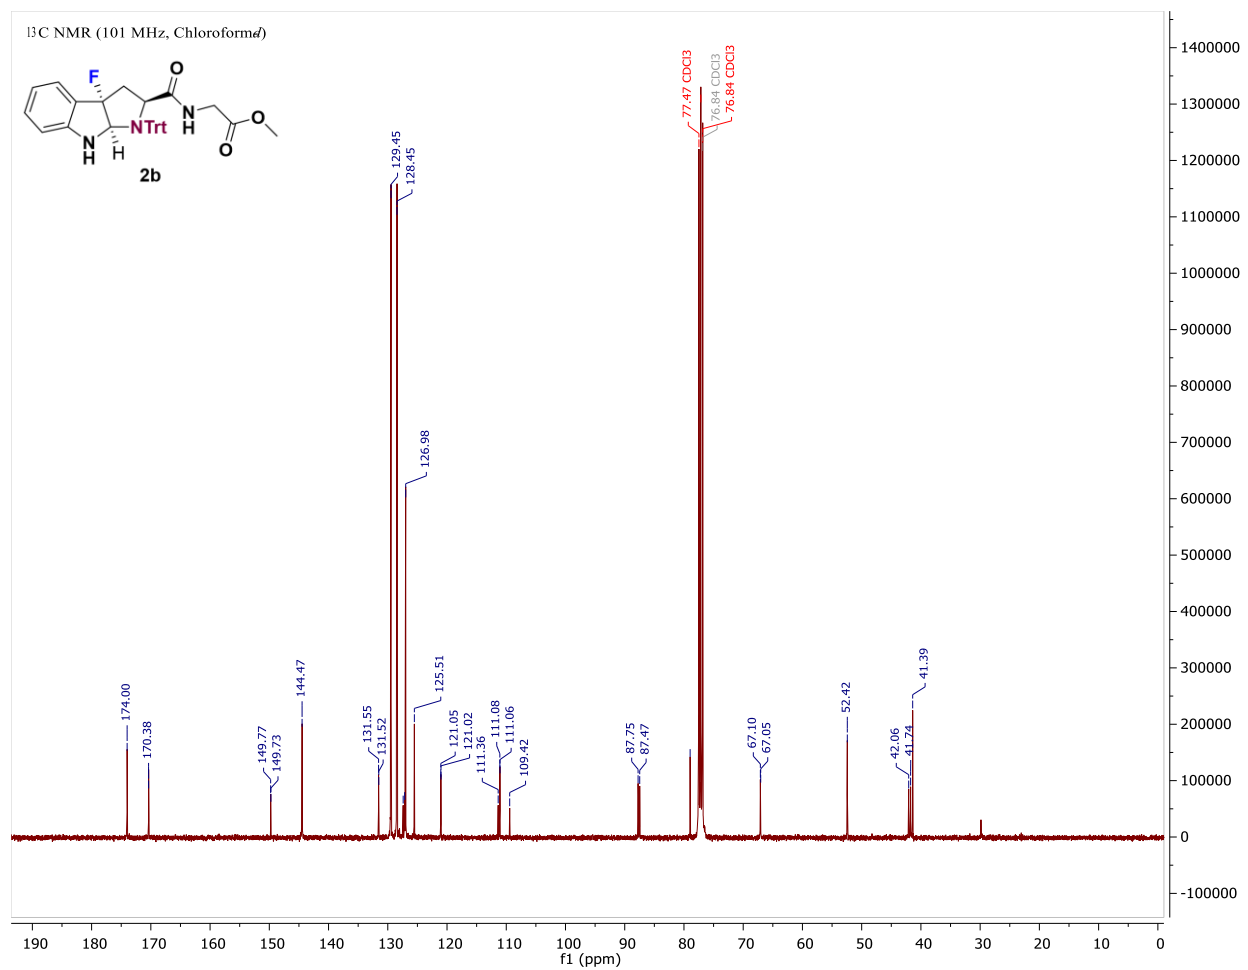

## Synthesis and characterization of compound **3a,b**

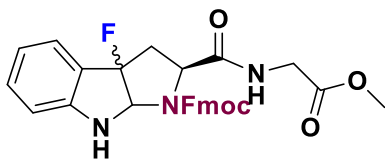

**3a,b** (1.2:1)<sup>c</sup> 76 %

**Chemical Formula:** C<sub>29</sub>H<sub>26</sub>FN<sub>3</sub>O<sub>5</sub>

**Exact Mass:** 515.19

**Molecular Weight:** 515.54

**(9H-fluoren-9-yl)methyl (2S)-3a-fluoro-2-((2-methoxy-2-oxoethyl)carbamoyl)-3,3a,8,8a-tetrahydropyrrolo[2,3-b]indole-1(2H)-carboxylate, N-Fmoc-FPI-Gly-OMe (**3a,b**).** A flame-dried round bottom flask under positive Ar atmosphere was charged with N-Fmoc-Trp-Gly-OMe (1.0 equiv, 250 mg, 0.50 mmol) dissolved in 10.0 mL of anhydrous DCM. To this solution, added 1-fluoro-2,4,6-trimethylpyridinium triflate (1.8 equiv, 261 mg, 0.90 mmol). The reaction contents were stirred for 3 h at 21 °C and the reaction progress was monitored by TLC. Upon completion, the crude (light yellow, clear) was concentrated under reduced pressure and immediately purified using silica gel flash column chromatography (gradient elution, 2:3 to 4:1 diethyl ether/petroleum ether) to obtain 197 mg (0.382 mmol) of **3a,b** as a white solid in 76 % isolated yield. <sup>19</sup>F-NMR spectroscopy on the crude reaction was used to determine the diastereomeric ratio (*syn-cis:anti-cis*) of 1.2:1. Stability note: stable for >8 weeks at room temperature and > 3 months at -20 °C. Major diastereomer was isolated for NMR analysis following two additional silica gel re-purifications with a slow gradient of diethyl ether/petroleum ether.

**<sup>1</sup>H NMR** (400 MHz, Methylene Chloride-*d*<sub>2</sub>) major diastereomer and rotamers, *syn-cis* δ (ppm) 7.90 – 7.50 (m, 5H), 7.50 – 7.16 (m, 5H), 6.94 – 6.67 (m, 1H), 6.51 (s, 1H), 6.45 – 6.32 (m, 1H), 5.07 (d, *J* = 21.2 Hz, 1H), 4.83 (ddd, *J* = 46.6, 10.7, 3.8 Hz, 1H), 4.60 – 4.45 (m, 1H), 4.40 – 4.32 (m, 1H), 4.26 – 4.14 (m, 1H), 4.14 – 3.74 (m, 4H), 3.7, 3.74 (s, 3H), 2.81 (ddd, *J* = 18.6, 14.0, 4.6 Hz, 1H), 2.56 – 2.36 (m, 1H).

**<sup>19</sup>F NMR** (282 MHz, Methylene Chloride-*d*<sub>2</sub>, ref. CFCl<sub>3</sub> = 0 ppm) major diastereomer and rotamers, *syn-cis* δ (ppm) -134.77 – -149.07 (m).

**<sup>13</sup>C NMR** (101 MHz, Methylene Chloride-*d*<sub>2</sub>) major diastereomer and major rotamer, *syn-cis* δ (ppm) 39.21 (d, *J* = 31.5 Hz), 41.34, 47.33, 52.33, 61.28, 66.56, 82.20 (d, *J* = 29.0 Hz), 107.12 (d, *J* = 196.8 Hz), 110.35, 119.42 (d, *J* = 1.9 Hz), 120.27 (d, *J* = 4.4 Hz), 123.69, 124.49, 124.76, 127.51, 127.67, 128.00, 128.13, 131.34 (d, *J* = 2.9 Hz), 141.25, 141.76, 144.05 (d, *J* = 6.2 Hz), 148.64 (d, *J* = 4.8 Hz), 154.71, 170.09, 170.39.

**HRMS** (ESI-TOF, *m/z*): [M+Na]<sup>+</sup> calculated 538.1754; found 538.1746 M+Na for C<sub>29</sub>H<sub>26</sub>FN<sub>3</sub>O<sub>5</sub>Na.

**TLC** (diethyl ether:petroleum ether, 1:1 v/v): R<sub>f</sub> = 0.5 (UV, I<sub>2</sub>, p-anisaldehyde).

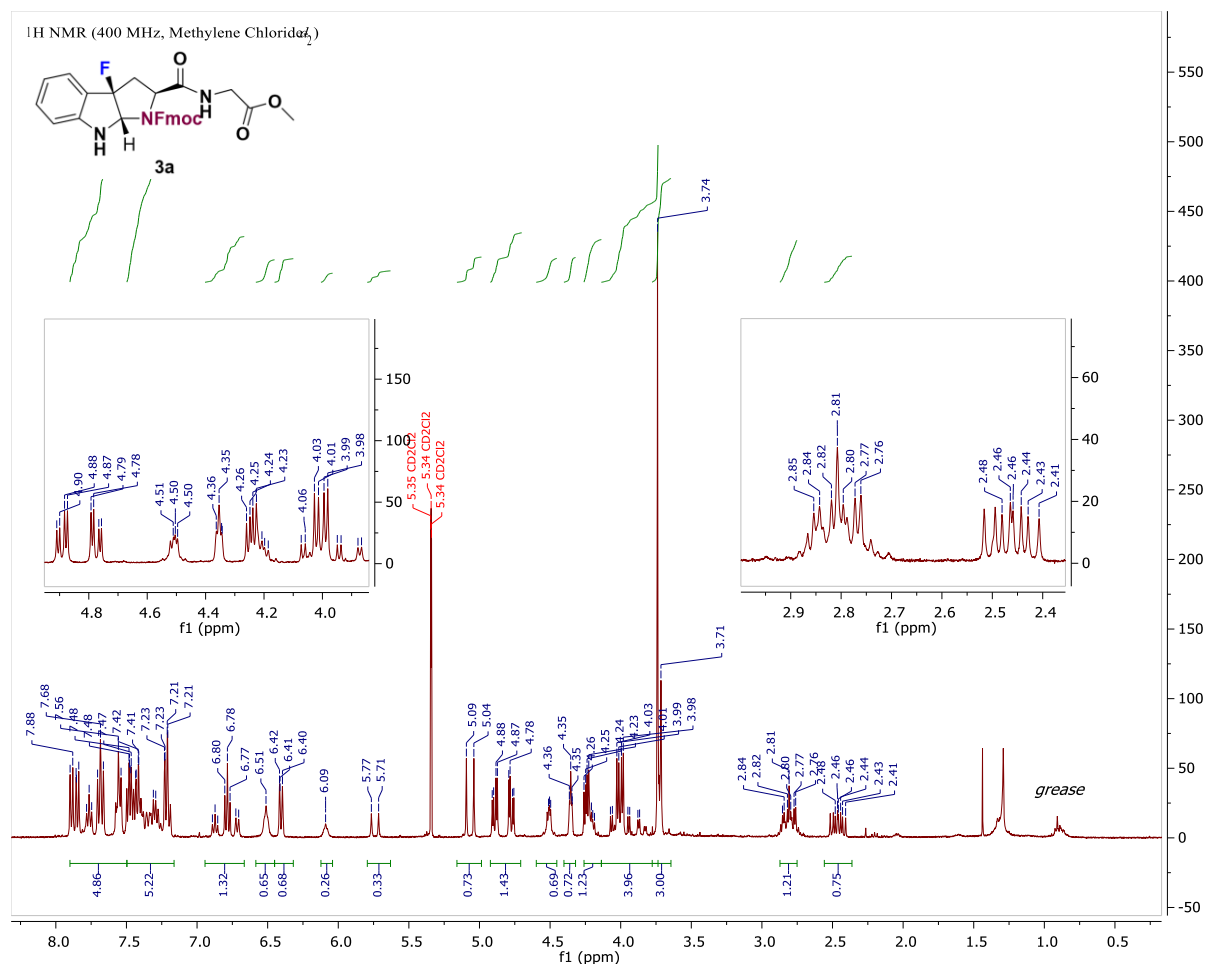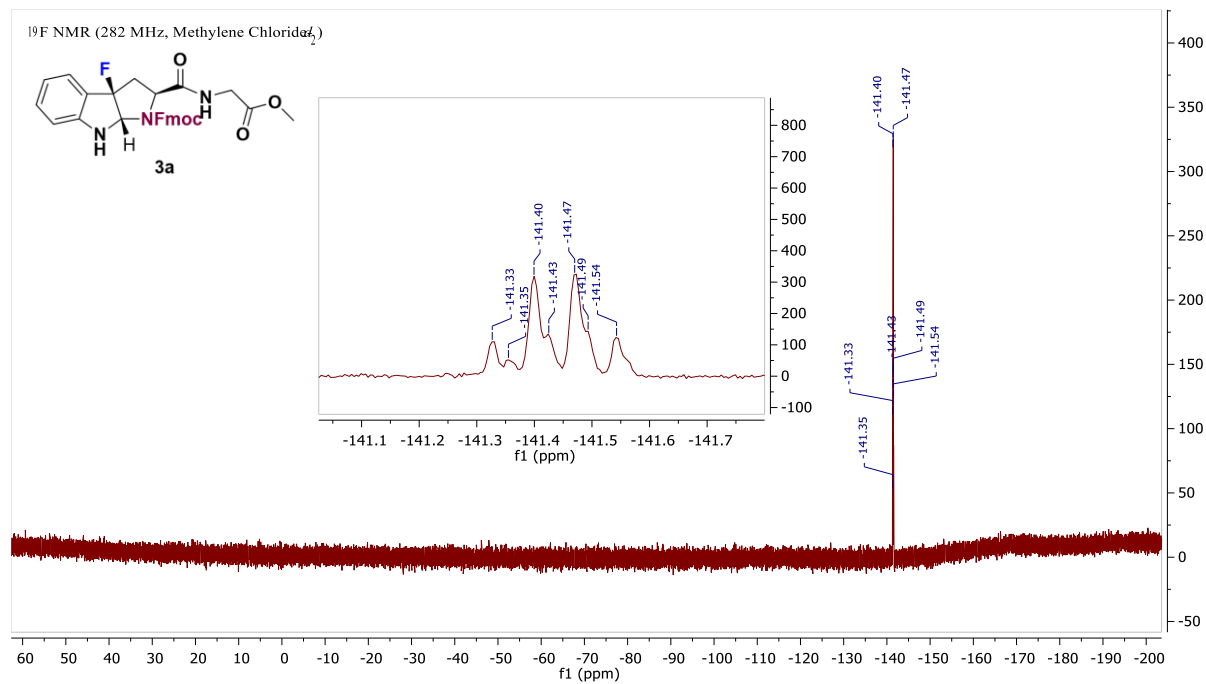

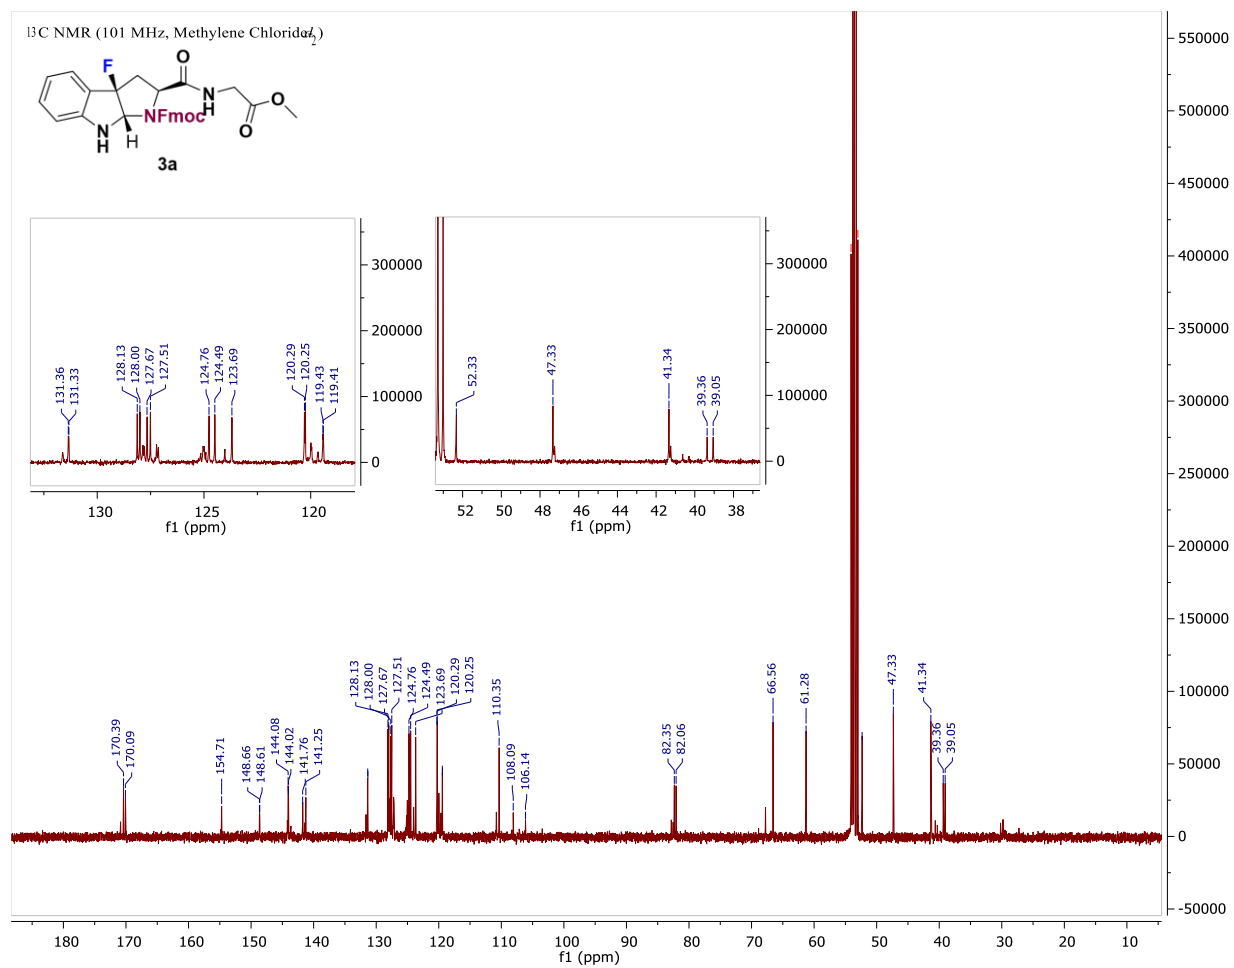

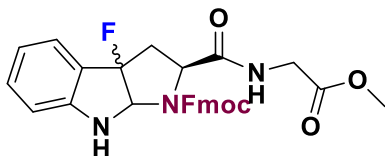

**3a,b** (1.2:1)<sup>c</sup> **76 %**  
**Chemical Formula:** C<sub>29</sub>H<sub>26</sub>FN<sub>3</sub>O<sub>5</sub>  
**Exact Mass:** 515.19  
**Molecular Weight:** 515.54

**<sup>1</sup>H NMR** (300 MHz, Acetone-*d*<sub>6</sub>) two diastereomers and rotamers, *syn-cis:anti-cis* (1:1), δ (ppm) 7.94 – 7.64 (m, 4H), 7.60 – 7.04 (m, 7H), 6.85 – 6.22 (m, 2H), 5.58 (ddd, *J* = 117.9, 21.0, 2.5 Hz, 1H), 4.91 – 3.65 (m, 6H), 3.61, 3.64 (two s, 1.5H), 3.55, 3.50 (two s, 1.5H), 3.42 – 2.63 (m, 3H).

**<sup>19</sup>F NMR** (282 MHz, Acetone-*d*<sub>6</sub>, ref. CFC<sub>l</sub><sub>3</sub> = 0 ppm) two diastereomers and rotamers, *syn-cis:anti-cis* (1:1), δ (ppm) -134.46 - -134.79 (d, *J* = 19.6 Hz), -135.10 (t, *J* = 19.2 Hz), -136.68 (q, *J* = 18.6 Hz), -138.02 (q, *J* = 18.5 Hz).

**<sup>13</sup>C NMR** (75 MHz, Acetone-*d*<sub>6</sub>) two diastereomers and rotamers, *syn-cis:anti-cis* (1:1), δ (ppm) 39.31, 39.72, 40.20, 40.63, 40.79, 40.81, 40.88, 46.94, 47.11, 51.37, 51.39, 60.85, 66.67, 67.77, 81.28, 81.69, 82.18, 82.59, 104.87, 105.58, 107.45, 108.18, 110.21, 110.23, 110.60, 110.61, 118.73, 118.76, 118.88, 118.91, 119.23, 119.26, 119.94, 120.04, 120.07, 120.13, 124.09, 124.13, 124.97, 125.10, 125.14, 125.24, 125.32, 125.40, 125.55, 127.11, 127.17, 127.42, 127.68, 127.74, 127.77, 127.82, 127.90, 131.36, 131.40, 131.43, 131.59, 131.64, 141.11, 141.18, 141.43, 143.85, 144.13, 144.30, 144.42, 149.67, 149.73, 150.42, 150.48, 154.20, 154.93, 169.44, 170.02, 170.04, 170.95, 171.68.

**HRMS** (ESI-TOF, *m/z*): [M+Na]<sup>+</sup> calculated 538.1754; found 538.1743 M+Na for C<sub>29</sub>H<sub>26</sub>FN<sub>3</sub>O<sub>5</sub>Na.

**TLC** (diethyl ether:petroleum ether, 1:1 v/v): R<sub>f</sub> = 0.5 (UV, I<sub>2</sub>, p-anisaldehyde).





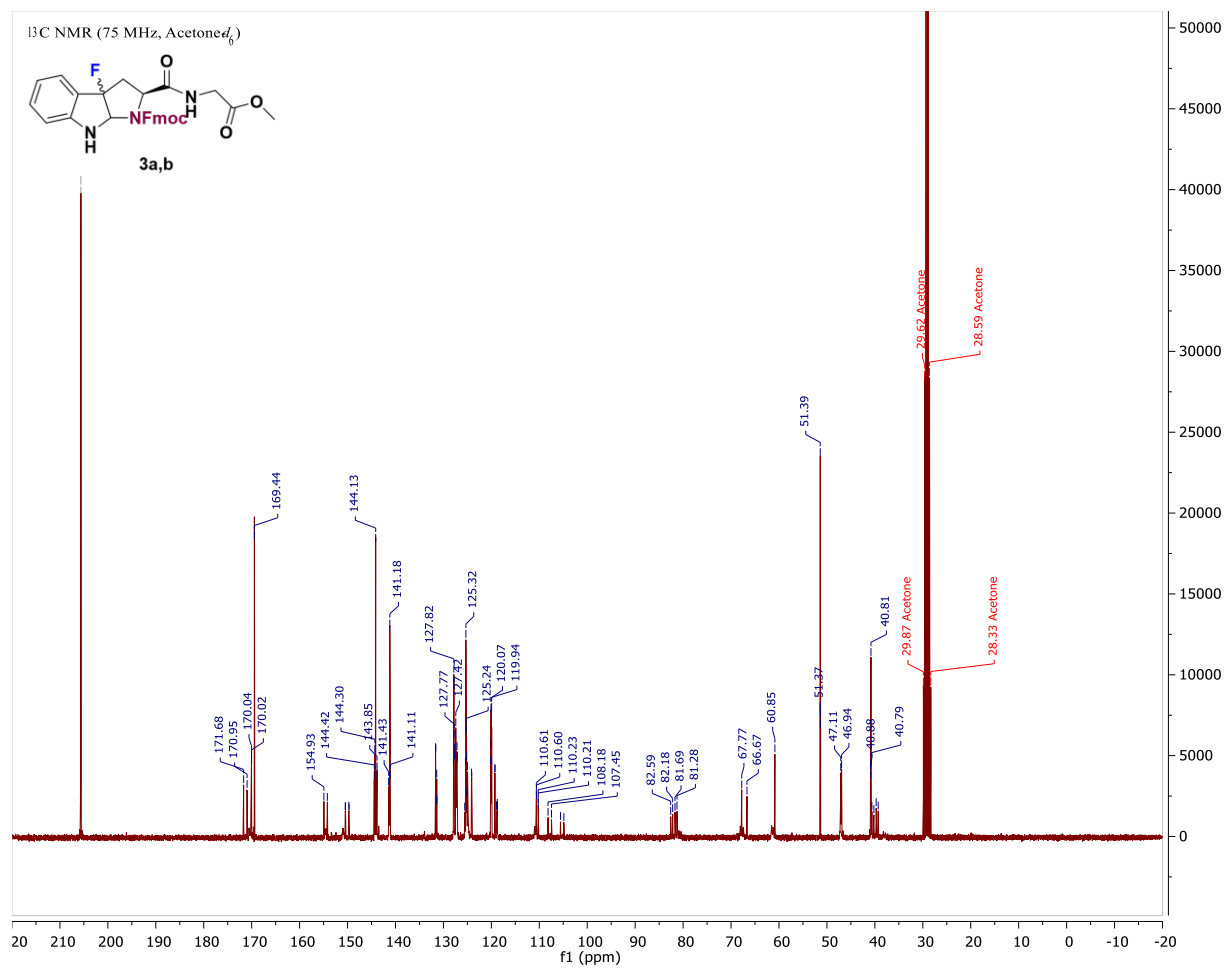

## Synthesis and characterization of compound **4a,b**

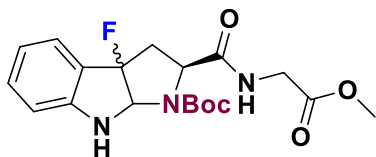

**4a,b** (1.2:1)<sup>c</sup> **68 %**

**Chemical Formula:** C<sub>19</sub>H<sub>24</sub>FN<sub>3</sub>O<sub>5</sub>

**Exact Mass:** 393.17

**Molecular Weight:** 393.42

**Tert-butyl (2S)-3a-fluoro-2-((2-methoxy-2-oxoethyl)carbamoyl)-3,3a,8,8a-tetrahydropyrrolo[2,3-b]indole-1(2H)-carboxylate, N-Boc-FPI-Gly-OMe (**4a,b**).** A flame-dried round bottom flask under positive Ar atmosphere was charged with N-Boc-Trp-Gly-OMe (1.0 equiv, 200 mg, 0.533 mmol) dissolved in 8.5 mL of anhydrous DCM. To this solution, added 1-fluoro-2,4,6-trimethylpyridinium triflate (1.8 equiv, 0.278 mg, 0.959 mmol) in 2.7 mL of anhydrous DCM. The reaction contents were stirred for 3 h at 21 °C and the reaction progress was monitored by TLC. Upon completion, the crude (light yellow, clear) was concentrated under reduced pressure and immediately purified using silica gel flash column chromatography (isocratic elution, 1:1:8 acetone:ethyl acetate:hexane to obtain 143 mg (0.362 mmol) of **4a,b** as a beige solid in 68 % isolated yield. <sup>19</sup>F-NMR spectroscopy on the crude reaction was used to determine the diastereomeric ratio (*syn-cis:anti-cis*) of 1.2:1. Stability note: stable > 1 year at room temperature. Major diastereomer was isolated for NMR analysis following two additional silica gel re-purifications with a slow gradient of diethyl ether/ethyl acetate/petroleum ether.

**<sup>1</sup>H NMR** (300 MHz, Acetone-*d*<sub>6</sub>) major diastereomer and rotamers, *syn-cis* δ (ppm) 7.74-7.61 (m, 4.2 Hz, 1H), 7.36 (t, *J* = 6.0 Hz, 1H), 7.21 (t, *J* = 7.6 Hz, 1H), 6.93 – 6.59 (m, 2H), 6.06 (d, *J* = 35.1 Hz, 1H), 5.61 (dd, *J* = 20.4, 9.2 Hz, 1H), 4.38 – 4.24 (m, 1H), 4.18 – 3.88 (m, 2H), 3.69 (s, 3H), 2.91 – 2.62 (m, 2H), 1.39, 1.51 (s, 9H).

**<sup>19</sup>F NMR** (282 MHz, Acetone-*d*<sub>6</sub>, ref. CFC<sub>l</sub><sub>3</sub> = 0 ppm) major diastereomer and rotamers, *syn-cis* δ (ppm) -136.90 (q, *J* = 19.3, 18.7 Hz), -138.08 – -138.52 (m).

**<sup>13</sup>C NMR** (101 MHz, Acetone-*d*<sub>6</sub>) major diastereomer, major rotamer, *syn-cis* δ (ppm) 27.57, 39.90 (d, *J* = 31.5 Hz), 40.84, 51.43, 60.96, 60.97, 80.31, 81.55 (d, *J* = 31.3 Hz), 105.89 (d, *J* = 194.3 Hz), 110.55 (d, *J* = 1.5 Hz), 118.65 (d, *J* = 2.7 Hz), 124.29, 125.47 (d, *J* = 23.1 Hz), 131.46 (d, *J* = 2.9 Hz), 150.82 (d, *J* = 4.3 Hz), 154.16, 170.09, 172.01.

**HRMS** (ESI-TOF, *m/z*): [M+Na]<sup>+</sup> calculated 416.1598; found 416.1594 for C<sub>19</sub>H<sub>24</sub>FN<sub>3</sub>O<sub>5</sub>Na.

**TLC** (acetone:ethyl acetate:hexane 1:1:8 v/v/v): R<sub>f</sub> = 0.5 (UV, I<sub>2</sub>, p-anisaldehyde).



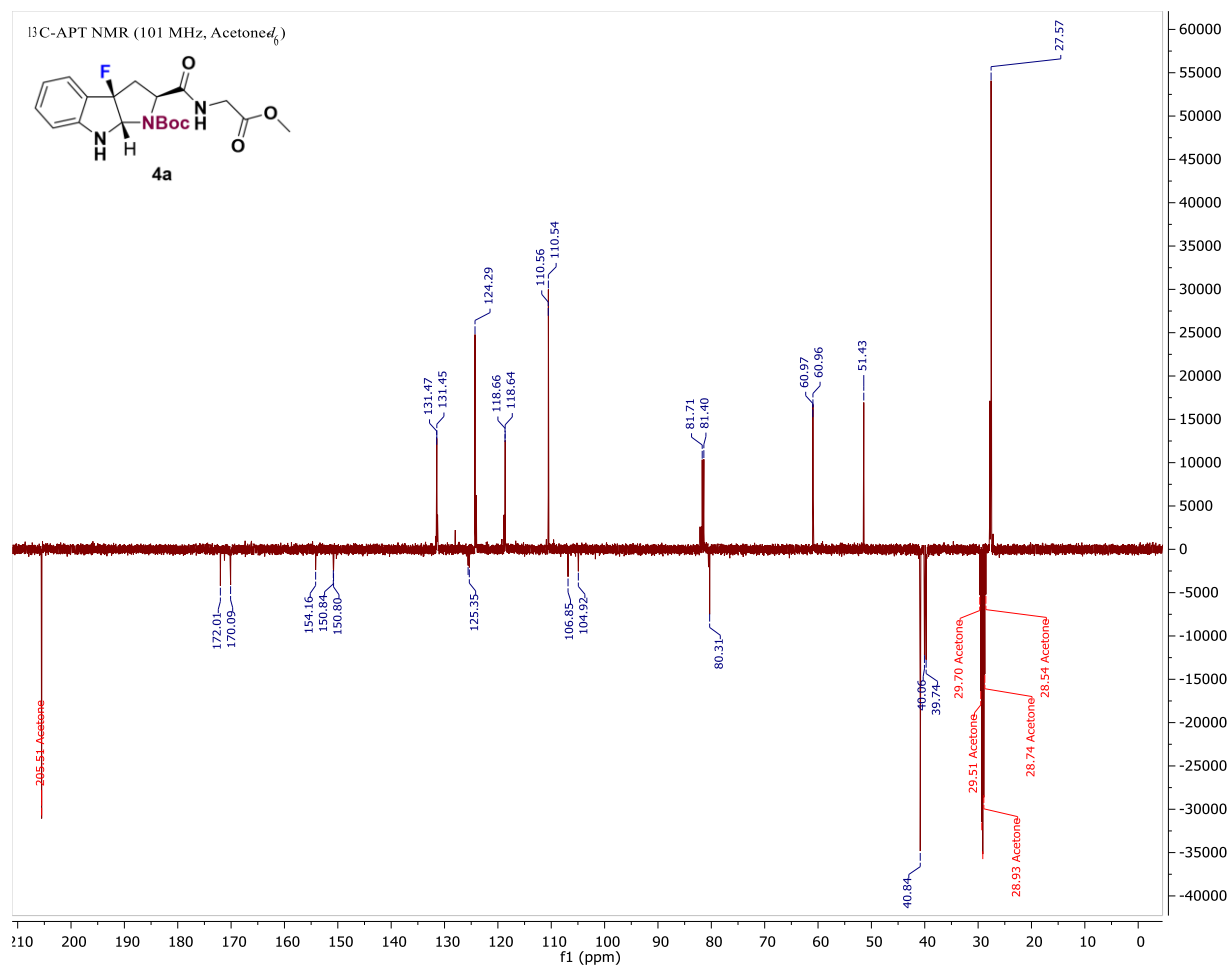

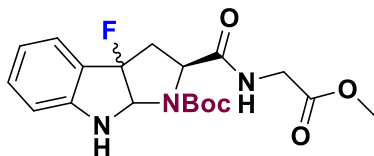

**4a,b** (1.2:1)<sup>c</sup> **68 %**

**Chemical Formula:** C<sub>19</sub>H<sub>24</sub>FN<sub>3</sub>O<sub>5</sub>

**Exact Mass:** 393.17

**Molecular Weight:** 393.42

**<sup>1</sup>H NMR** (300 MHz, Acetone-*d*<sub>6</sub>) two diastereomers and rotamers, *syn-cis:anti-cis* (1.4:1), δ (ppm) δ 7.77 – 7.54 (m, 1H), 7.34 (dd, *J* = 15.5, 7.6 Hz, 1H), 7.24 – 7.14 (m, 1H), 6.83 – 6.60 (m, 2H), 6.33 – 5.94 (m, 1H), 5.74 – 5.48 (m, 1H), 4.73 – 4.25 (m, 1H), 4.15 – 3.70 (m, 2H), 3.69, 3.59 (two s, 3H), 3.39 – 2.58 (m, 3H), 1.51, 1.39 (two s, 9H).

**<sup>19</sup>F NMR** (282 MHz, Acetone-*d*<sub>6</sub>, ref. CFC<sub>l</sub><sub>3</sub> = 0 ppm) two diastereomers and rotamers, *syn-cis:anti-cis* (1.4:1), δ (ppm) -132.95 – -133.78 (m), -132.21 – -133.64 (m), -136.96 (q, *J* = 19.3 Hz), -138.37 (td, *J* = 19.2, 13.0 Hz).

**<sup>13</sup>C NMR** (75 MHz, Acetone-*d*<sub>6</sub>) two diastereomers and rotamers, *syn-cis:anti-cis* (1.4:1), due to the complexity of the spectrum, C-F couplings were could not be determined, δ (ppm) 28.34, 28.58, 40.40, 40.51, 40.72, 40.83, 41.50, 41.61, 52.20, 61.73, 61.74, 62.47, 81.06, 81.28, 81.69, 82.00, 82.16, 82.47, 82.58, 82.88, 105.69, 107.07, 107.62, 109.01, 111.32, 111.36, 111.73, 119.40, 119.43, 119.62, 119.64, 119.98, 120.01, 124.83, 125.07, 125.63, 126.06, 126.12, 126.30, 126.35, 132.08, 132.10, 132.22, 132.25, 132.33, 132.37, 151.06, 151.10, 151.59, 151.63, 151.92, 154.58, 154.66, 154.92, 170.38, 170.87, 170.93, 171.49, 171.98, 172.76.

**HRMS** (ESI-TOF, *m/z*): [M+Na]<sup>+</sup> calculated 416.1598; found 416.1588 for C<sub>19</sub>H<sub>24</sub>FN<sub>3</sub>O<sub>5</sub>Na.

**TLC** (acetone:ethyl acetate:hexane 1:1:8 v/v/v): R<sub>f</sub> = 0.5 (UV, I<sub>2</sub>, p-anisaldehyde).

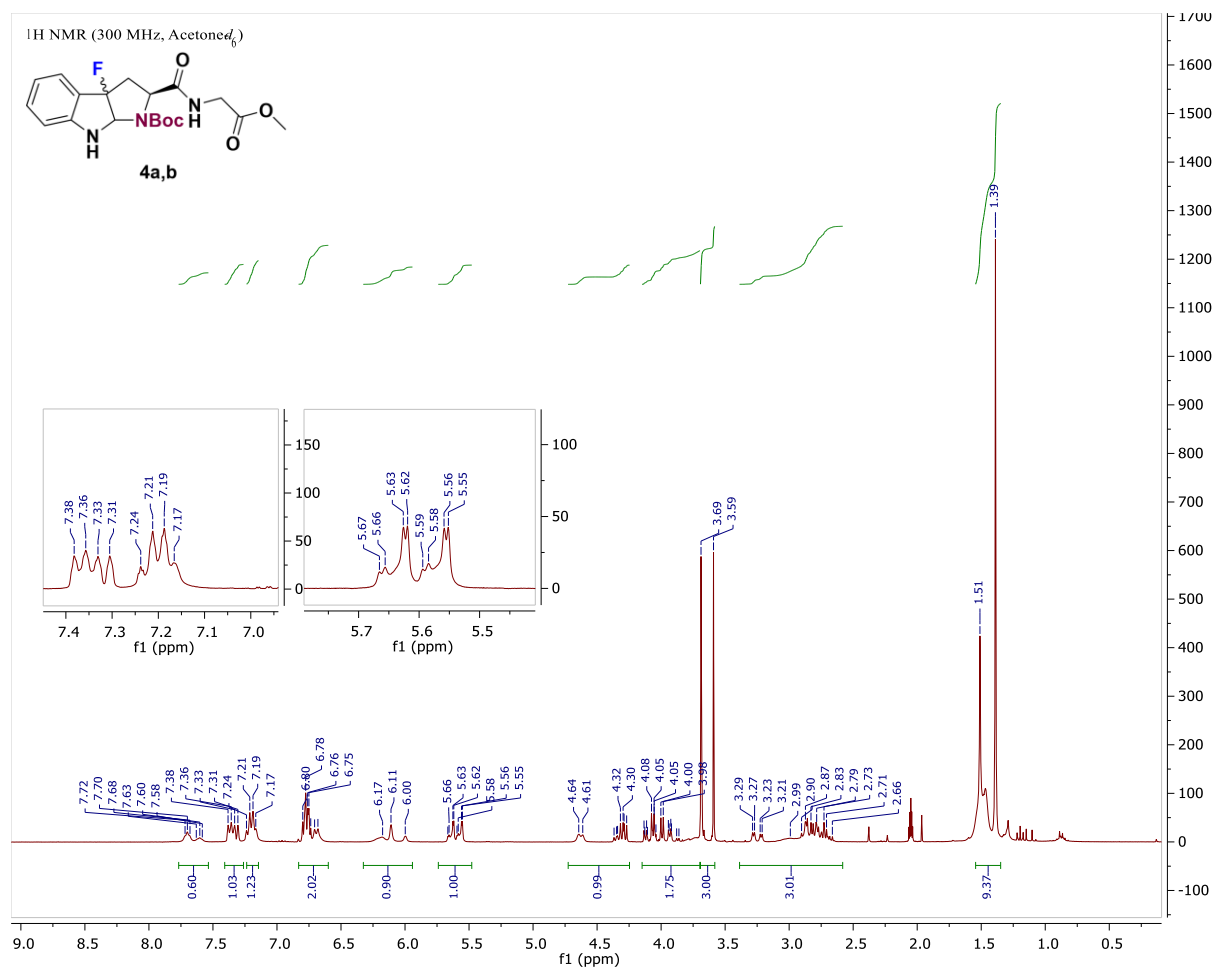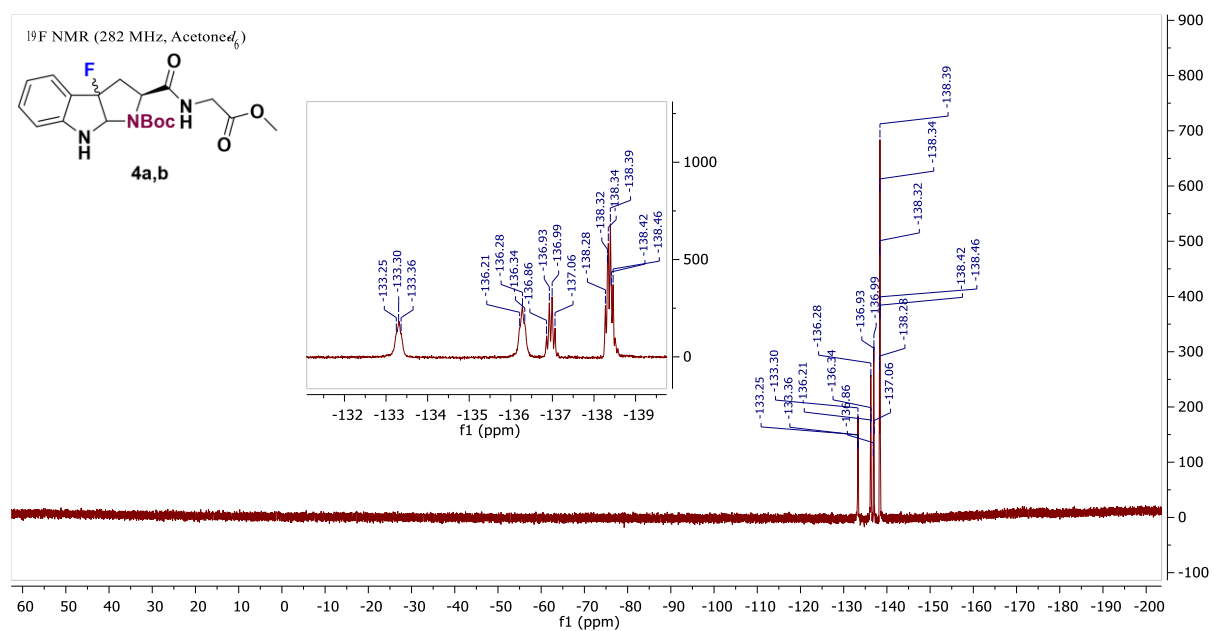

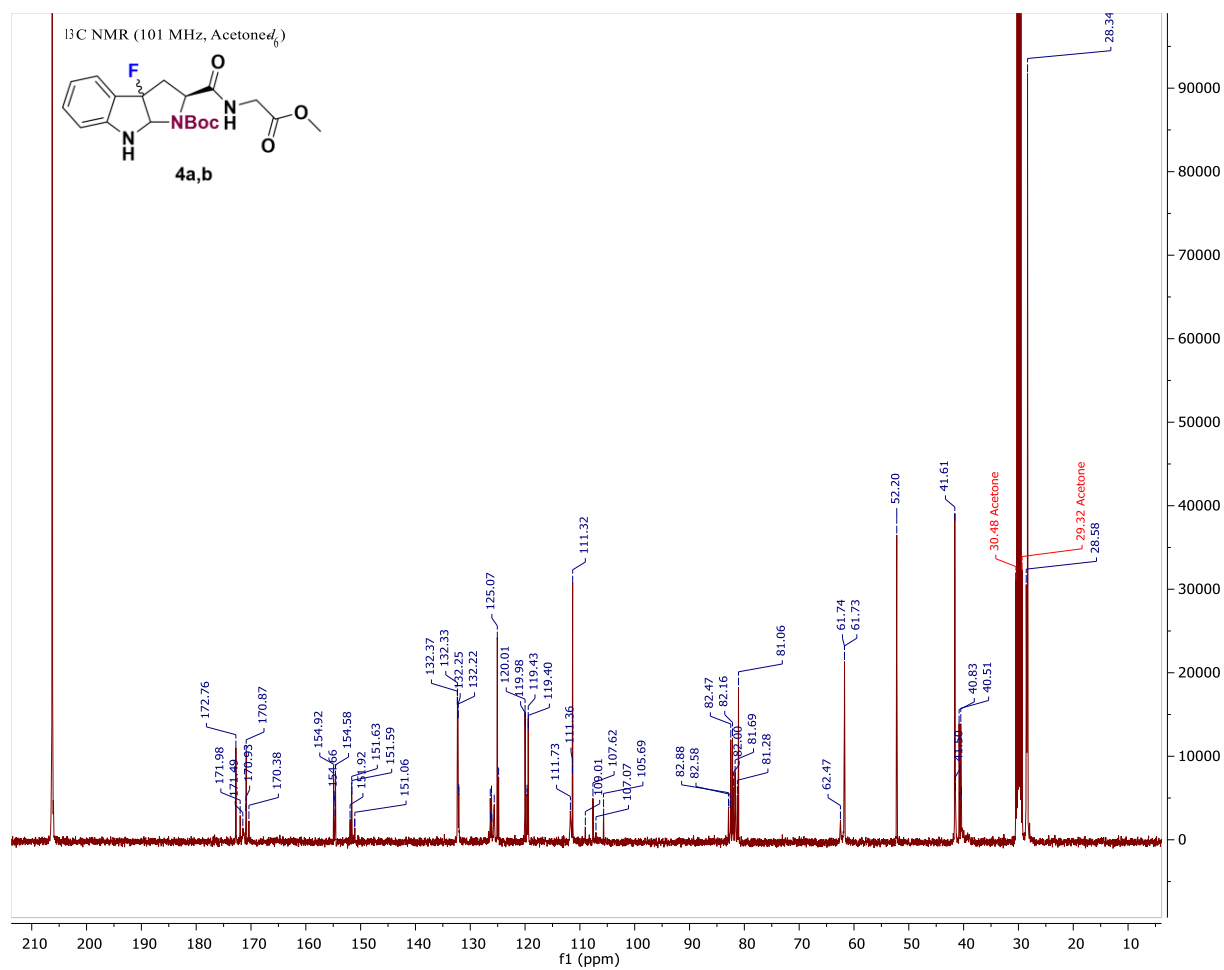



## Synthesis and characterization of compound **5a,b**

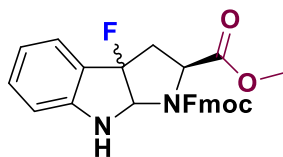

**5a,b** (1.2:1)<sup>c</sup> **85 %**  
**[ 2.0 g, 4.4 mmol ]**  
**Chemical Formula:** C<sub>27</sub>H<sub>23</sub>FN<sub>2</sub>O<sub>4</sub>  
**Exact Mass:** 458.16  
**Molecular Weight:** 458.49

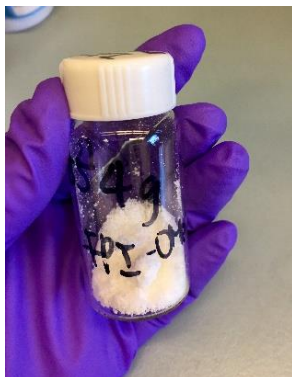

**1-((9H-fluoren-9-yl)methyl) 2-methyl (2S)-3a-fluoro-3,3a,8,8a-tetrahydropyrrolo[2,3-b]indole-1,2(2H)-dicarboxylate, N-Fmoc-FPI-OMe (**5a,b**).** A flame-dried round bottom flask under positive Ar atmosphere was charged with N-Fmoc-Trp-OMe (1.0 equiv, 2.00 g, 4.54 mmol) dissolved in 70 mL of anhydrous DCM. To this solution, added 1-fluoro-2,4,6-trimethylpyridinium triflate (1.8 equiv, 2.36 g, 8.17 mmol) in 5.7 mL of anhydrous DCM. The reaction contents were stirred for 3 h at 21 °C and the reaction progress was monitored by TLC. Upon completion, the crude (light orange, clear) was concentrated under reduced pressure and immediately purified using silica gel flash column chromatography (gradient elution, 1:9 to 1:1 diethyl ether/petroleum ether) to obtain 1.77 g (3.86 mmol) of **5a,b** as a white solid in 85 % isolated yield. Crude <sup>19</sup>F-NMR was used to determine the diastereomeric ratio (*syn-cis*:*anti-cis*) of 1.2:1. The *syn-cis* diastereomer eluted from the column first (less polar). In <sup>19</sup>F-NMR (without <sup>1</sup>H-decoupling), *syn-cis* diastereomer was observed as a multiplet in a shape resembling a quartet, while *anti-cis* diastereomer was observed as a multiplet in a shape resembling a triplet. Stability note: solid material stable for > 9 months at -20 °C.

**<sup>1</sup>H NMR** (300 MHz, Acetone-*d*<sub>6</sub>) two diastereomers and rotamers, *syn-cis*:*anti-cis* (1.2:1), δ (ppm) 8.00 – 7.69 (m, 3H), 7.61 (t, *J* = 7.2 Hz, 1H), 7.55 – 7.12 (m, 6H), 6.86 – 6.53 (m, 2H), 6.34 – 6.05 (m, 1/2H), 5.77 – 5.19 (m, 1H), 4.85 (d, *J* = 3.3 Hz, 1/2H), 4.76 – 4.14 (m, 4H), 3.70, 3.69 (s, 1.7H), 3.19, 3.19 (s, 1.3H), 3.13 – 2.62 (m, 2H).

**<sup>19</sup>F NMR** (282 MHz, Acetone-*d*<sub>6</sub>, ref. CFCl<sub>3</sub> = 0 ppm) two diastereomers and rotamers, *syn-cis*:*anti-cis* (1.2:1), δ (ppm) -137.33 (q, *J* = 20.8 Hz), -138.23 – -139.02 (m), -140.33 (dt, *J* = 43.1, 16.6 Hz).

**<sup>13</sup>C NMR** (75 MHz, Acetone-*d*<sub>6</sub>) two diastereomers and rotamers, *syn-cis*:*anti-cis* (1.2:1), due to the complexity of the spectrum, C-F couplings were could not be determined), δ (ppm) 37.52, 37.93, 38.15, 38.57, 39.17, 39.59, 40.21, 40.63, 47.13, 47.19, 47.31, 51.47, 51.68, 51.92, 52.23, 59.34, 59.40, 59.66, 59.77, 66.96, 67.03, 67.54, 79.18, 79.61, 80.04, 81.69, 82.08, 82.87, 83.26, 104.05, 104.85, 105.83, 106.41, 106.65, 107.45, 108.40, 108.99, 110.08, 110.28, 110.49, 110.80, 118.40, 118.50, 118.53, 118.86, 118.89, 119.08, 119.11, 120.09, 120.12, 120.19, 120.25, 123.90, 124.01, 124.16, 124.82, 125.04, 125.10, 125.21, 125.26, 125.34, 127.20, 127.25, 127.40, 127.45, 127.53, 127.85, 127.91, 127.95, 128.02, 131.40, 131.43, 131.49, 131.52, 131.94, 131.98, 141.35, 141.54, 144.01, 144.10, 144.16, 144.24, 144.35, 144.44, 149.65, 149.71, 150.19, 150.25, 151.82, 151.86, 152.35, 152.40, 153.72, 154.12, 154.32, 154.80, 170.43, 170.59, 171.37, 171.90.

**HRMS** (ESI-TOF, *m/z*): [M+Na]<sup>+</sup> calculated 481.1540; found 481.1544 for C<sub>27</sub>H<sub>23</sub>FN<sub>2</sub>O<sub>4</sub>Na.

**TLC** (diethyl ether:petroleum ether, 6:4 v/v): R<sub>f</sub> = 0.7 (UV, I<sub>2</sub>, p-anisaldehyde).

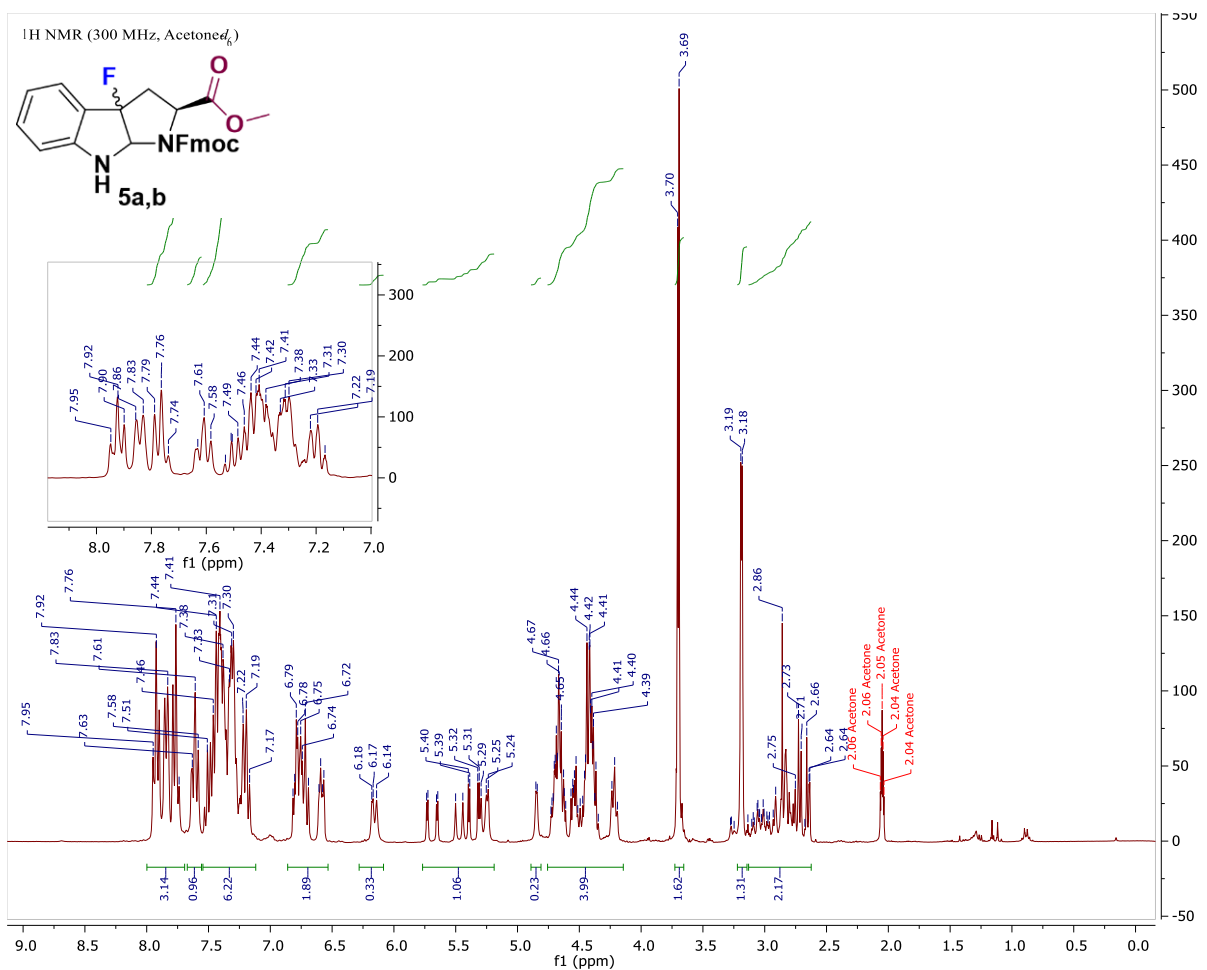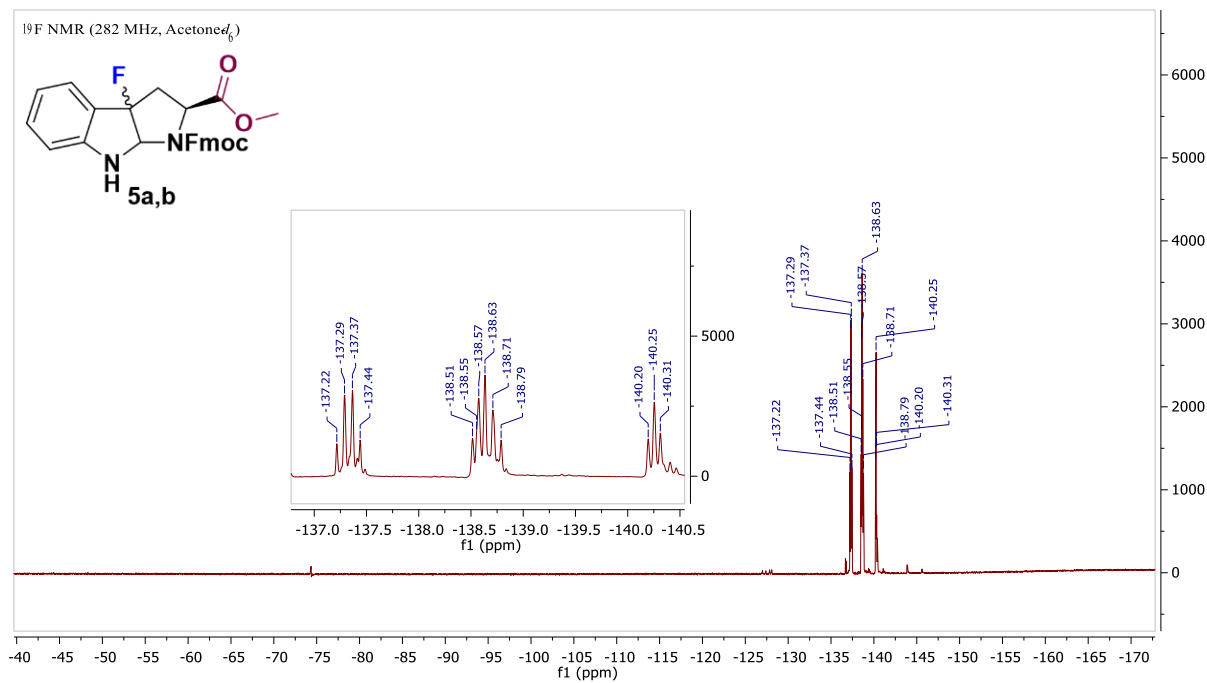

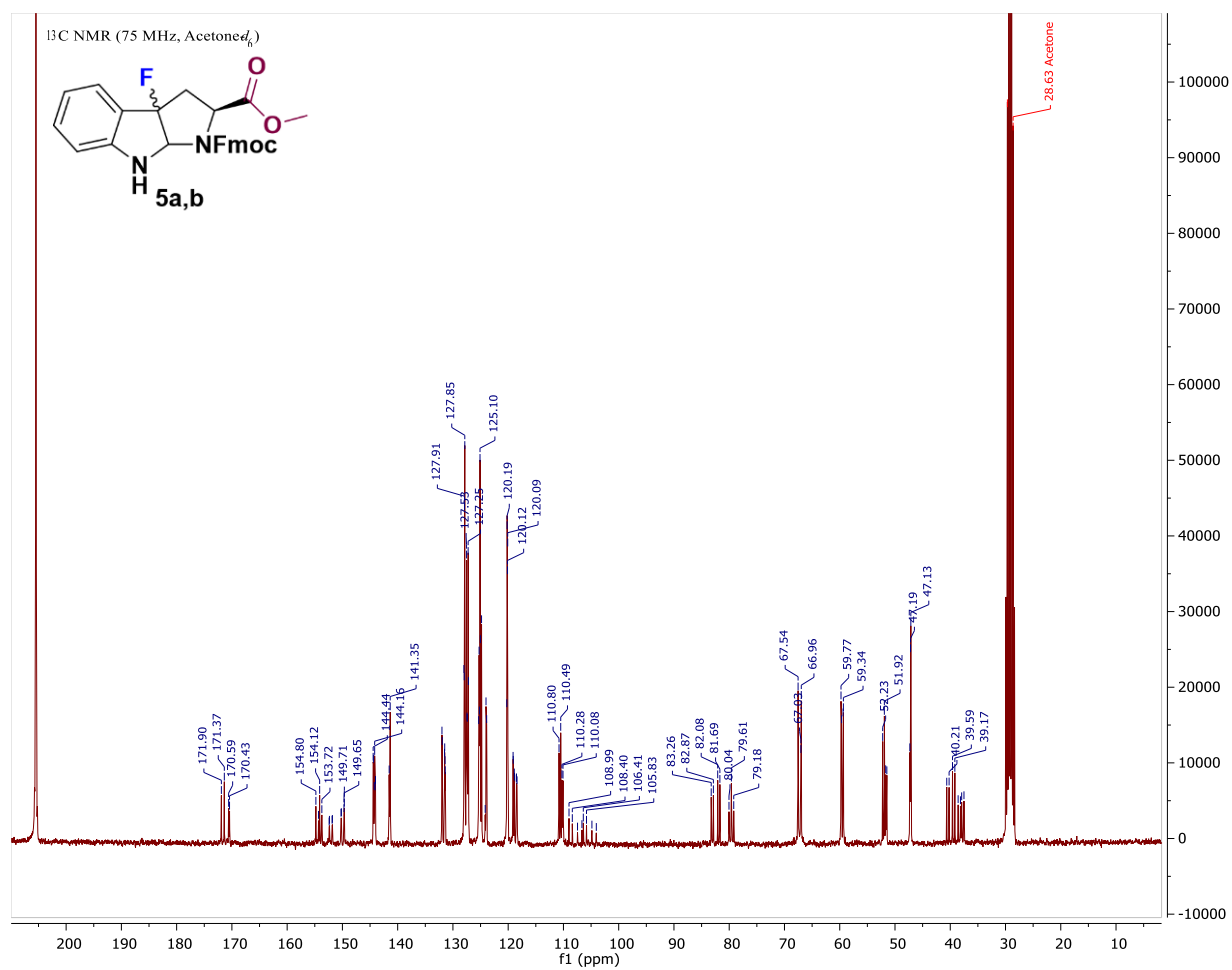

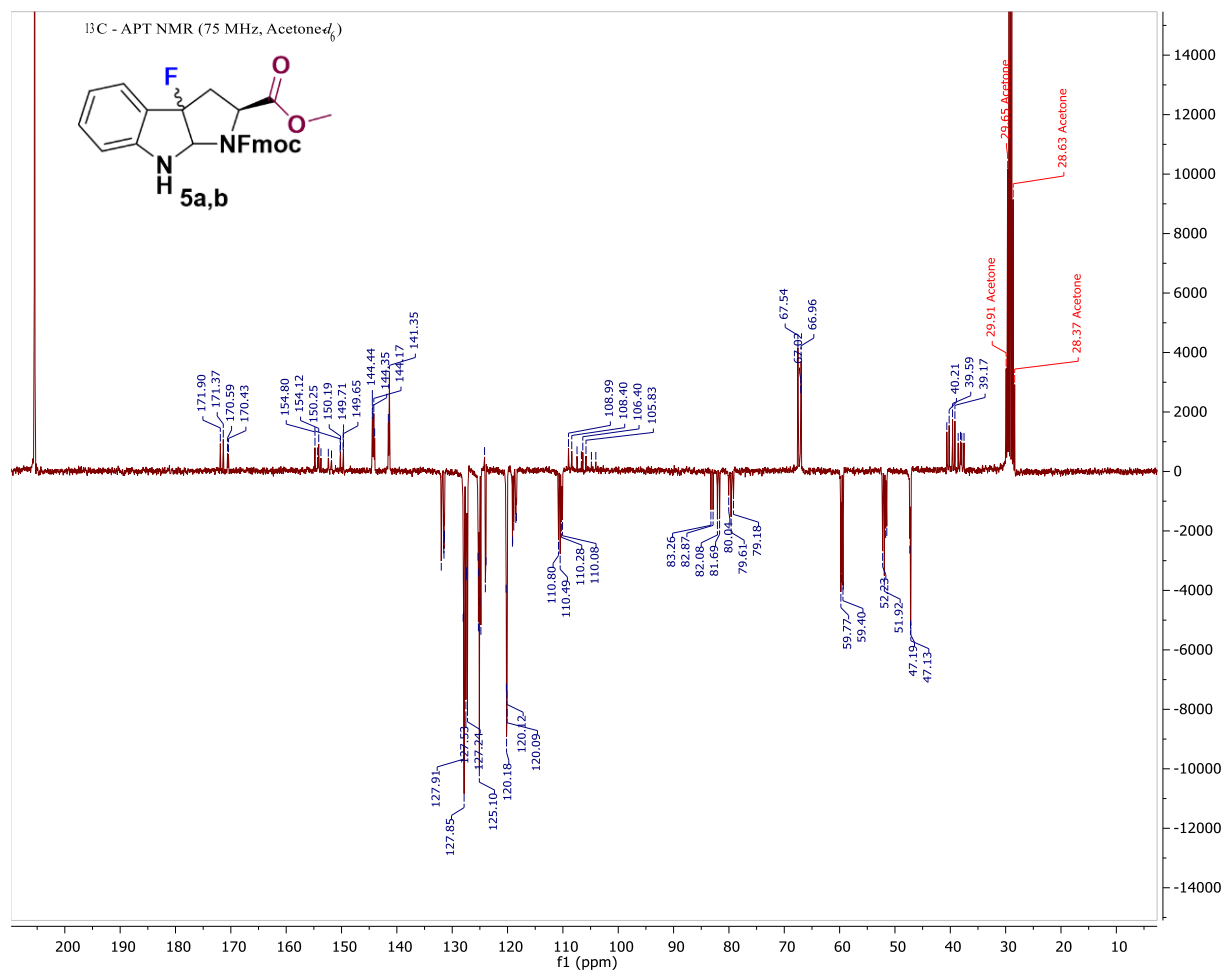

## Synthesis and characterization of compound **6a,b**

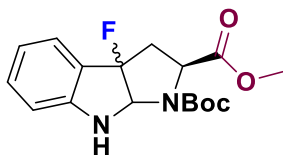

**6a,b** (1.1:1)<sup>c</sup> 81 %

**Chemical Formula:** C<sub>17</sub>H<sub>21</sub>FN<sub>2</sub>O<sub>4</sub>

**Exact Mass:** 336.15

**Molecular Weight:** 336.36

**1-(Tert-butyl) 2-methyl (2S)-3a-fluoro-3,3a,8,8a-tetrahydropyrrolo[2,3-b]indole-1,2(2H)-dicarboxylate, N-Boc-FPI-OMe (**6a,b**).** A flame-dried round bottom flask under positive Ar atmosphere was charged with N-Boc-Trp-OMe (1.0 equiv, 200 mg, 0.63 mmol) dissolved in 10.0 mL of anhydrous DCM. To this solution, added 1-fluoro-2,4,6-trimethylpyridinium triflate (1.8 equiv, 327 mg, 1.13 mmol) in 2.6 mL of anhydrous DCM. The reaction contents were stirred for 3 h at 21 °C and the reaction progress was monitored by TLC. Upon completion, the crude (orange, clear) was concentrated under reduced pressure and immediately purified using silica gel flash column chromatography (gradient elution, 1:3 to 2:1 ethyl acetate/petroleum ether) to obtain 171 mg (0.51 mmol) of **6a,b** as a beige solid in 81 % isolated yield. <sup>19</sup>F-NMR spectroscopy on the crude reaction was used to determine the diastereomeric ratio (*syn-cis*:*anti-cis*) of 1.1:1. In the <sup>19</sup>F-NMR spectrum (obtained without 1H-decoupling), the *syn-cis* diastereomer was observed as a multiplet in a shape resembling a quartet, while the splitting for the *anti-cis* diastereomer was observed as a multiplet in a shape resembling a triplet. Both diastereomers were partially separated for NMR analysis following two additional silica gel re-purifications with a slow gradient elution of diethyl ether/petroleum ether.

**<sup>1</sup>H NMR** (300 MHz, Chloroform-*d*) major diastereomer and rotamers, *syn-cis* δ (ppm) 7.44 – 7.19 (m, 2H), 6.88 (td, *J* = 7.5, 4.4 Hz, 1H), 6.72 (dd, *J* = 8.1, 1.9 Hz, 1H), 5.72 (ddd, *J* = 23.2, 12.8, 1.9 Hz, 1H), 5.29, 4.82 (brs, 1H), 4.45 (ddd, *J* = 30.7, 8.3, 5.0 Hz, 1H), 3.82 (s, 3H), 2.90 – 2.59 (m, 2H), 1.59, 1.47 (s, 9H)

**<sup>19</sup>F NMR** (282 MHz, Chloroform-*d*, ref. CFCl<sub>3</sub> = 0 ppm) major diastereomer and rotamers, *syn-cis* δ (ppm) -138.68 (q, *J* = 21.0 Hz), -139.09 (q, *J* = 19.0 Hz).

**<sup>13</sup>C NMR** (75 MHz, Chloroform-*d*) major diastereomer and major rotamer, *syn-cis* δ (ppm) 28.32, 39.96 (d, *J* = 32.1 Hz), 52.53, 59.94, 81.58 (d, *J* = 14.5 Hz), 106.17 (d, *J* = 195.9 Hz), 110.96, 119.64 (d, *J* = 2.4 Hz), 124.20, 125.07 (d, *J* = 23.3 Hz), 131.72 (d, *J* = 2.9 Hz), 149.72 (d, *J* = 4.6 Hz), 154.33, 172.40.

**HRMS** (ESI-TOF, *m/z*): [M+Na]<sup>+</sup> calculated 359.1383; found 359.1376 for C<sub>17</sub>H<sub>21</sub>FN<sub>2</sub>O<sub>4</sub>Na.

**TLC** (ethyl acetate:hexane 6:4 v/v): R<sub>f</sub> = 0.75 (UV, I<sub>2</sub>, p-anisaldehyde).



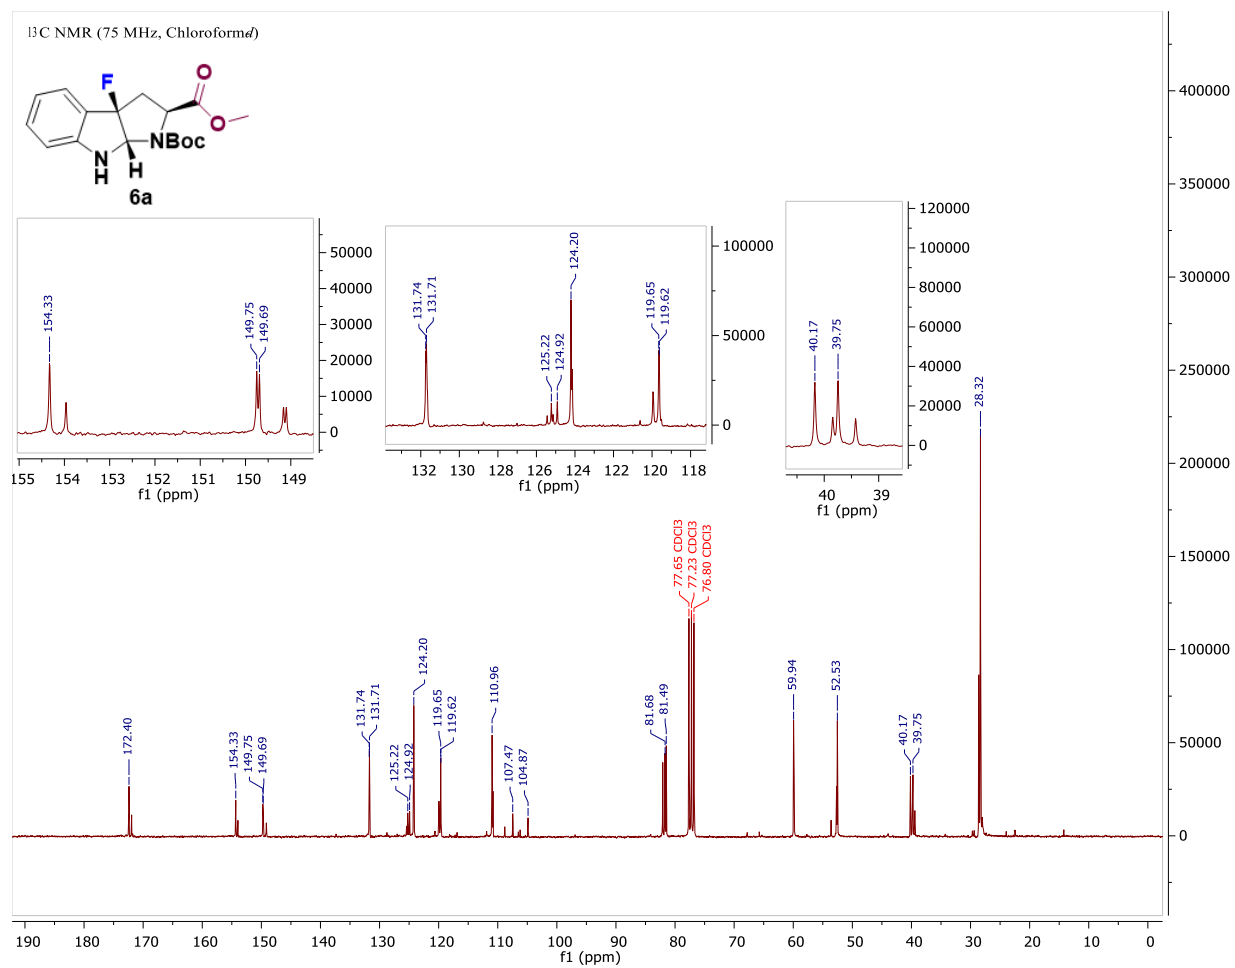

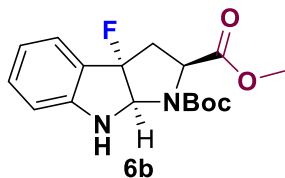

**$^1\text{H}$  NMR** (300 MHz, Chloroform-*d*) minor diastereomer and rotamers, *anti-cis*  $\delta$  (ppm) 7.35 – 7.17 (m, 2H), 6.78 (ddt,  $J$  = 21.6, 15.4, 7.6 Hz, 2H), 5.58 - 5.46(m, 1H), 4.69 (ddd,  $J$  = 42.6, 9.0, 2.4 Hz, 1H), 3.32 (s, 3H), 3.12 – 2.72 (m, 2H), 1.59, 1.46 (s, 9H).

**$^{19}\text{F}$  NMR** (282 MHz, Chloroform-*d*, ref.  $\text{CFCl}_3$  = 0 ppm) minor diastereomer and rotamers, *anti-cis*  $\delta$  (ppm) -139.61 (t,  $J$  = 16.6 Hz), -141.11 – -141.87 (m).

**$^{13}\text{C}$  NMR** (75 MHz, Chloroform-*d*) minor diastereomer and major rotamer, *anti-cis*  $\delta$  (ppm) 28.36, 38.95 (d,  $J$  = 32.2 Hz), 52.19, 59.71 (d,  $J$  = 4.5 Hz), 79.96 (d,  $J$  = 32.6 Hz), 81.32, 105.40 (d,  $J$  = 197.4 Hz), 110.52, 119.18 (d,  $J$  = 2.9 Hz), 123.93, 124.08 (d,  $J$  = 22.4 Hz), 132.09 (d,  $J$  = 3.3 Hz), 151.35 (d,  $J$  = 4.3 Hz), 154.01, 171.35.

**HRMS** (ESI-TOF,  $m/z$ ):  $[\text{M}+\text{Na}]^+$  calculated 359.1383; found 359.1386 for  $\text{C}_{17}\text{H}_{21}\text{FN}_2\text{O}_4\text{Na}$ .

**TLC** (ethyl acetate:hexane 6:4 v/v):  $R_f$  = 0.7 (UV,  $\text{I}_2$ , p-anisaldehyde).



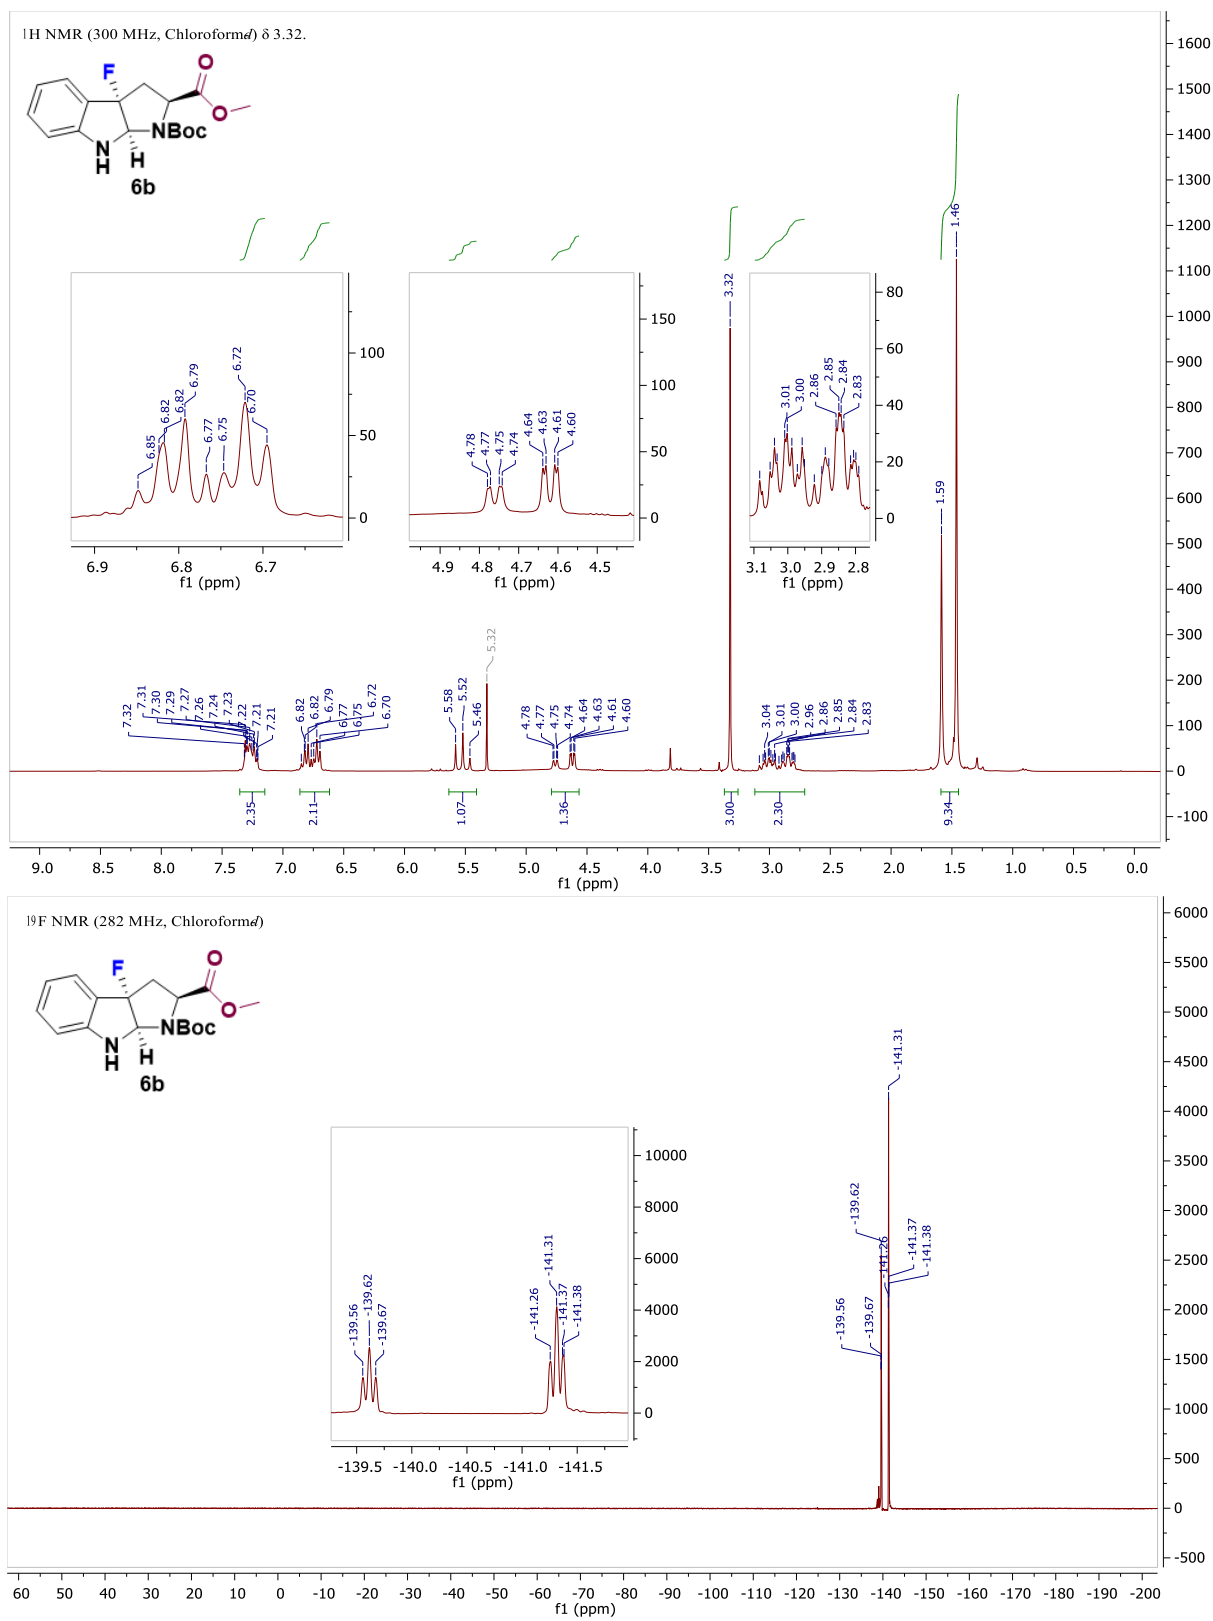

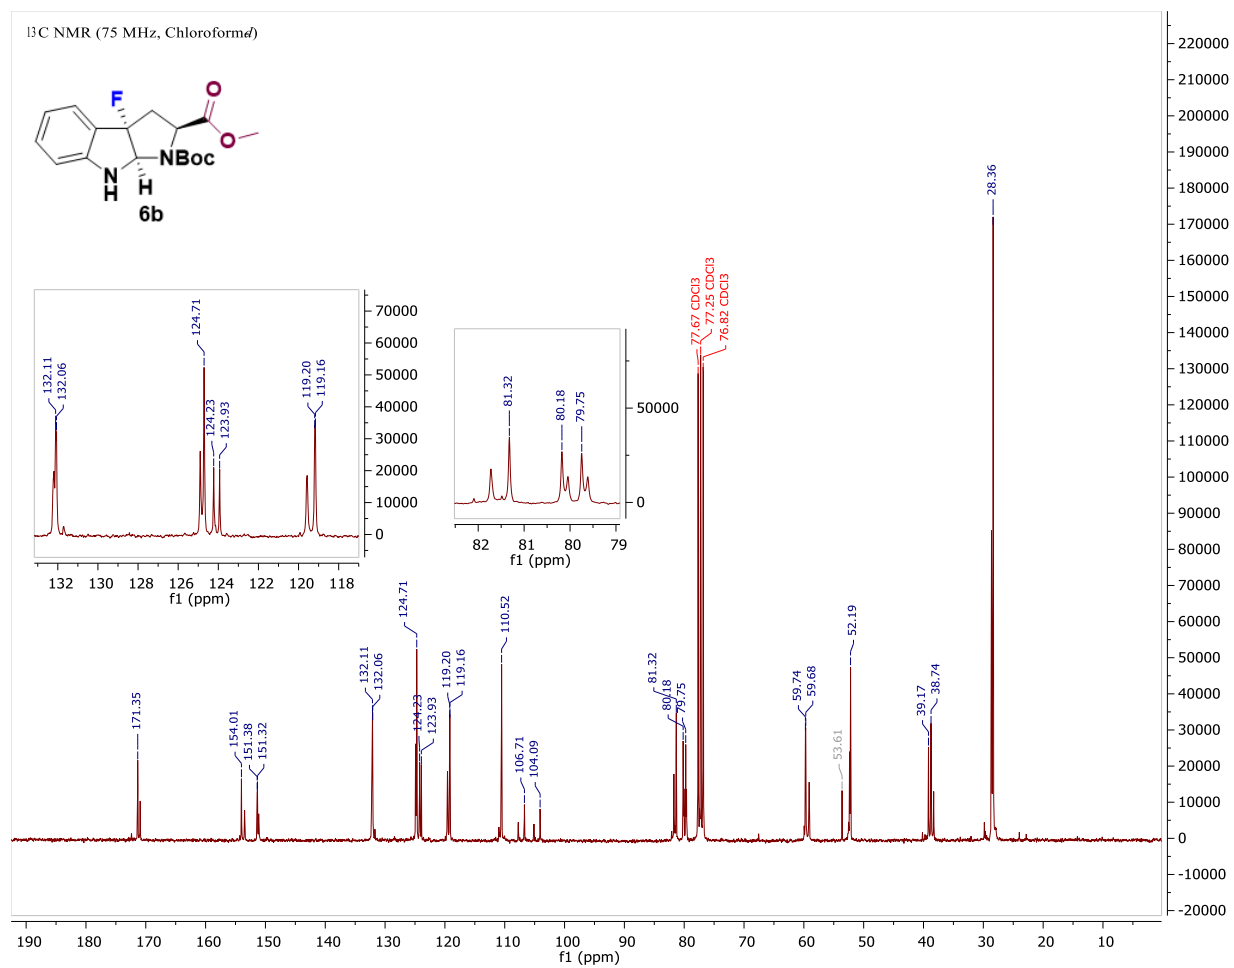

## Synthesis and characterization of compound **7a,b**

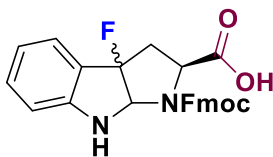

**7a,b** (1.2:1)<sup>c</sup> **85 %**

**Chemical Formula:** C<sub>26</sub>H<sub>21</sub>FN<sub>2</sub>O<sub>4</sub>

**Exact Mass:** 444.15

**Molecular Weight:** 444.46

**(2S)-1-(((9H-fluoren-9-yl)methoxy)carbonyl)-3a-fluoro-1,2,3,3a,8,8a-hexahydropyrrolo[2,3-b]indole-2-carboxylic acid, N-Fmoc-FPI-OH (**7a,b**).** A flame-dried round bottom flask under positive Ar atmosphere was charged with N-Fmoc-Trp-OH (1.0 equiv, 300 mg, 7.04 mmol) dissolved in 8.0 mL of anhydrous DCM. To this solution, added 1-fluoro-2,4,6-trimethylpyridinium triflate (1.8 equiv, 367 mg, 1.27 mmol) in 2.0 mL of anhydrous DCM. The reaction contents were stirred for 3 h at 21 °C and the reaction progress was monitored by TLC. Upon completion, the crude (light yellow/orange, clear) was concentrated under reduced pressure and immediately purified using silica gel flash column chromatography (gradient elution, 0.5:99.5 to 6:94 methanol/DCM) to obtain 266 mg (0.598 mmol) of **7a,b** as a light orange solid in 85 % isolated yield. <sup>19</sup>F-NMR spectroscopy on the crude reaction was used to determine the diastereomeric ratio (*syn-cis:anti-cis*) of 1.2:1.

**<sup>1</sup>H NMR** (300 MHz, Methylene Chloride-*d*<sub>2</sub>) two diastereomers and rotamers, *syn-cis:anti-cis* (1.2:1), δ (ppm) 7.87 (td, *J* = 7.9, 2.9 Hz, 1H), 7.79 – 7.69 (m, 1H), 7.65 (d, *J* = 7.9 Hz, 1H), 7.56 – 7.34 (m, 4H), 7.34 – 7.14 (m, 3H), 7.05 – 6.35 (m, 3H), 5.80 – 5.50 (m, 0H), 5.17 – 4.97 (m, 1H), 4.92 – 4.06 (m, 4H), 3.13 – 2.43 (m, 2H).

**<sup>19</sup>F NMR** (282 MHz, Methylene Chloride-*d*<sub>2</sub>, ref. CFCl<sub>3</sub> = 0 ppm) two diastereomers and rotamers, *syn-cis:anti-cis* (1.2:1), δ (ppm) -137.74 (td, *J* = 17.5, 5.0 Hz), -138.82, -138.88 – -139.13 (m), -139.32 (tt, *J* = 23.5, 13.1 Hz).

**<sup>13</sup>C NMR** (75 MHz, Methylene Chloride-*d*<sub>2</sub>) two diastereomers and rotamers, *syn-cis:anti-cis* (1.2:1) due to the complexity of the spectrum, C-F couplings were could not be determined, δ (ppm) 37.64, 38.07, 38.62, 39.23, 39.66, 40.24, 40.67, 47.11, 47.33, 59.22, 59.57, 66.75, 67.32, 68.08, 79.74, 80.16, 81.69, 82.08, 82.73, 83.12, 104.81, 105.57, 106.06, 106.72, 107.42, 108.16, 108.66, 110.40, 110.55, 110.85, 111.04, 119.55, 119.73, 120.07, 120.23, 120.31, 123.87, 123.96, 124.46, 124.58, 124.66, 124.73, 124.78, 124.88, 124.97, 125.20, 127.22, 127.27, 127.50, 127.55, 127.73, 127.83, 127.88, 128.03, 128.10, 131.60, 131.70, 132.17, 132.29, 141.25, 141.35, 141.41, 141.44, 141.66, 141.73, 143.73, 143.86, 143.94, 143.98, 144.03, 144.10, 148.89, 148.96, 149.37, 149.43, 150.41, 150.45, 151.10, 154.55, 154.76, 155.17, 173.79, 174.60, 175.28, 176.06.

**HRMS** (ESI-TOF, *m/z*): [M+H]<sup>+</sup> calculated 445.1564; found 445.1549 for C<sub>26</sub>H<sub>22</sub>FN<sub>2</sub>O<sub>4</sub>.

**TLC** (acetic acid:methanol:DCM 0.1:5:95.9 v/v): R<sub>f</sub> = 0.7 (UV, I<sub>2</sub>, bromocresol green).

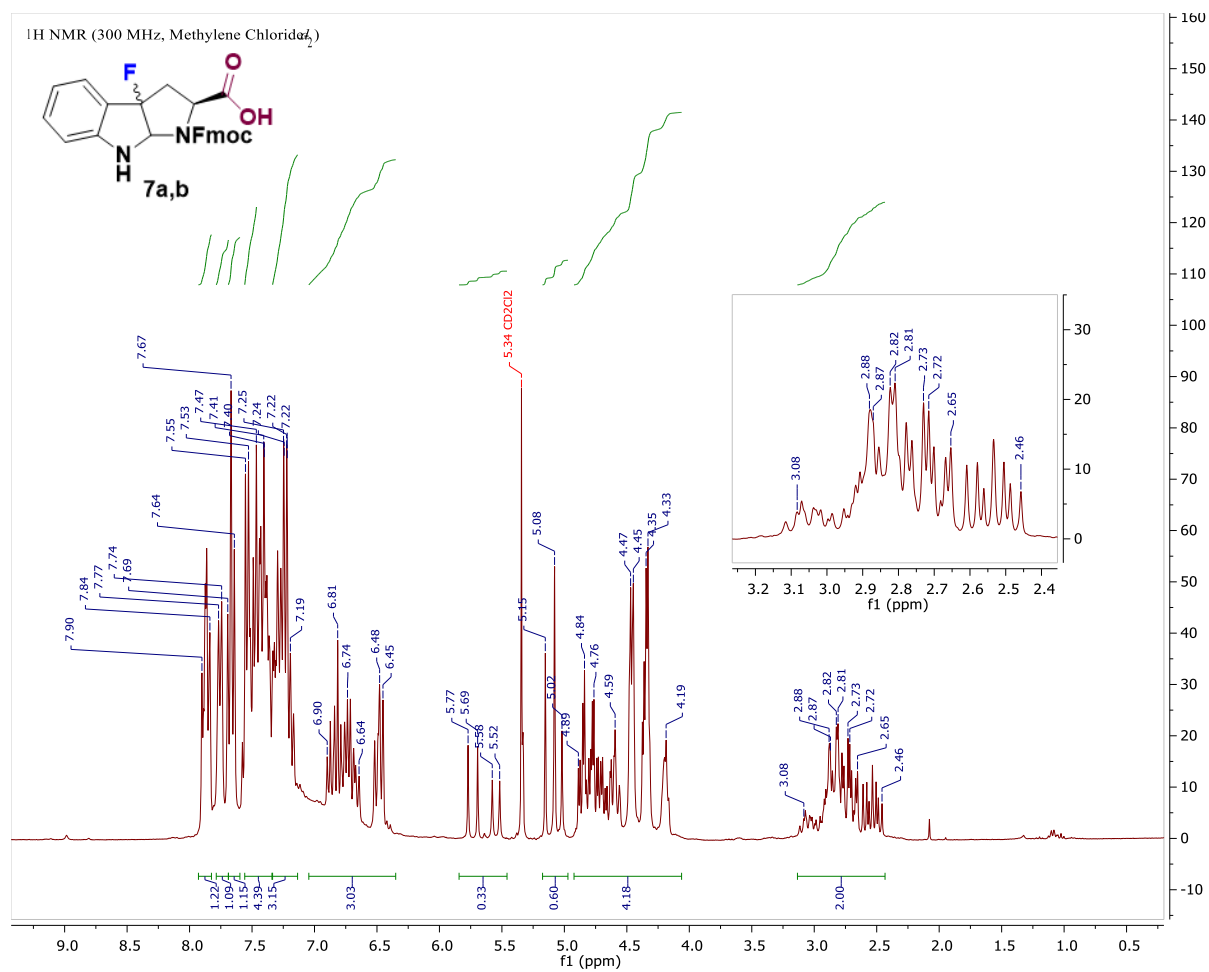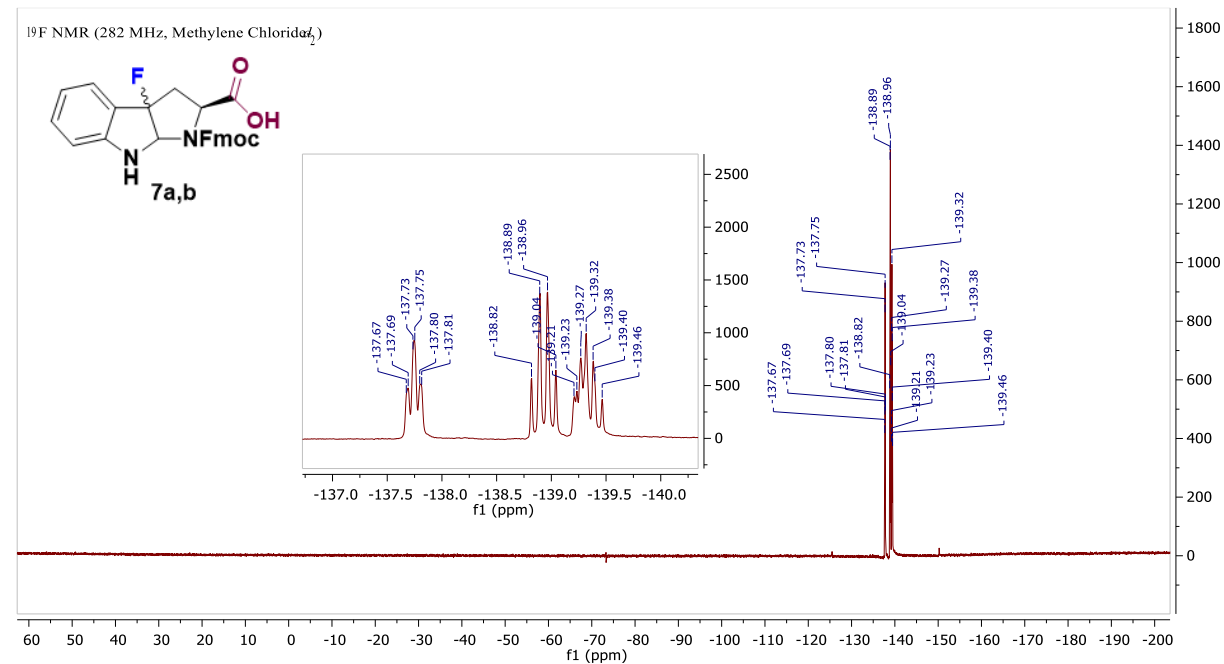

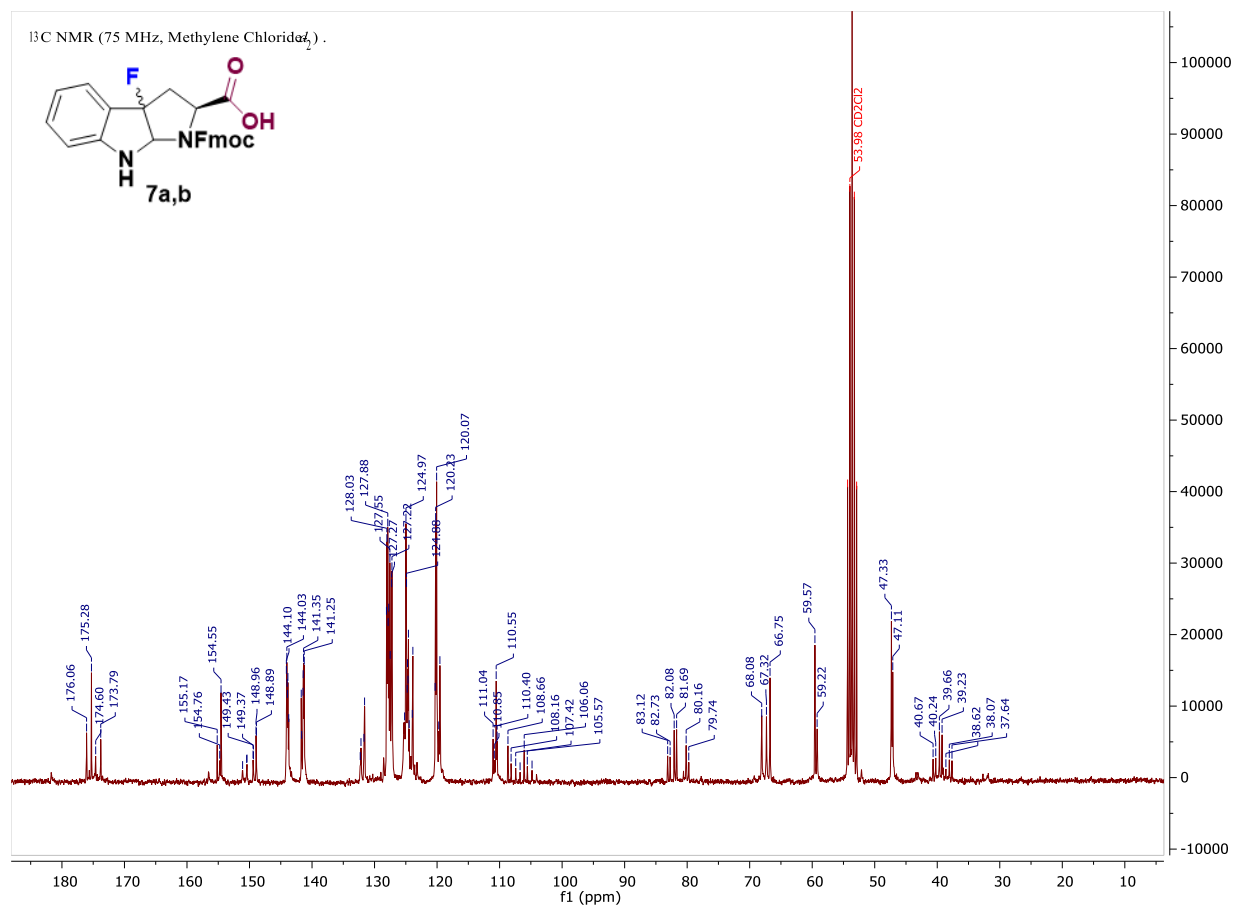

## Synthesis and characterization of compound **8a,b**

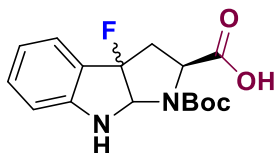

**8a,b** (1.1:1)<sup>c</sup> 74 %

**Chemical Formula:** C<sub>16</sub>H<sub>19</sub>FN<sub>2</sub>O<sub>4</sub>

**Exact Mass:** 322.13

**Molecular Weight:** 322.34

**(2S)-1-(tert-butoxycarbonyl)-3a-fluoro-1,2,3,3a,8,8a-hexahydropyrrolo[2,3-b]indole-2-carboxylic acid, N-Boc-FPI-OH (**8a,b**).** A flame-dried round bottom flask under positive Ar atmosphere was charged with N-Boc-Trp-OH (1.0 equiv, 150 mg, 0.493 mmol) dissolved in 6.0 mL of anhydrous DCM. To this solution, added 1-fluoro-2,4,6-trimethylpyridinium triflate (1.8 equiv, 257 mg, 0.89 mmol) in 1.0 mL of anhydrous DCM. The reaction contents were stirred for 3 h at 21 °C and the reaction progress was monitored by TLC. Upon completion, the crude (light orange-brown, clear) was concentrated under reduced pressure and immediately purified using silica gel flash column chromatography (gradient elution, 0.2:99.8 to 5:95 methanol:chloroform) to obtain 118 mg (0.365 mmol) of **8a,b** as a beige solid in 74 % isolated yield. <sup>19</sup>F-NMR spectroscopy on the crude reaction was used to determine the diastereomeric ratio (*syn-cis:anti-cis*) of 1.1:1.

**<sup>1</sup>H NMR** (300 MHz, Methylene Chloride-*d*<sub>2</sub>) two diastereomers and rotamers, *syn-cis:anti-cis* (1.4:1), δ (ppm) 7.44 – 7.23 (m, 2H), 6.87 (t, *J* = 7.2 Hz, 1H), 6.74 (t, *J* = 7.1 Hz, 1H), 5.77 – 5.45 (m, 1H), 4.80 – 4.34 (m, 1H), 3.16 – 2.63 (m, 2H), 1.51 (d, *J* = 36.4 Hz, 9H).

**<sup>19</sup>F NMR** (282 MHz, Methylene Chloride-*d*<sub>2</sub>, ref. CFCl<sub>3</sub> = 0 ppm) two diastereomers and rotamers, *syn-cis:anti-cis* (1.4:1), δ (ppm) -137.43 (dt, *J* = 21.6, 12.0 Hz), -139.05 (q, *J* = 19.3 Hz), -139.25 – -139.57 (m), -139.83 (q, *J* = 22.0 Hz).

**<sup>13</sup>C NMR** (75 MHz, Methylene Chloride-*d*<sub>2</sub>) two diastereomers and rotamers, *syn-cis:anti-cis* (1.4:1), due to the complexity of the spectrum, C-F couplings could not be determined, δ (ppm) 27.86, 28.15, 37.45, 37.89, 38.75, 39.08, 39.17, 39.47, 39.50, 39.90, 59.08, 59.49, 59.61, 59.66, 80.04, 80.27, 80.47, 80.69, 81.60, 81.70, 81.81, 81.86, 81.96, 82.00, 82.25, 82.32, 104.99, 106.26, 107.58, 108.86, 110.67, 110.78, 119.38, 119.41, 119.74, 119.77, 123.87, 123.97, 124.15, 124.40, 124.69, 124.79, 125.00, 125.30, 128.38, 131.48, 131.51, 131.55, 131.59, 131.97, 132.08, 148.93, 148.99, 149.69, 149.74, 150.45, 150.73, 153.90, 154.20, 174.02, 175.37, 175.76, 176.98.

**HRMS** (ESI-TOF, *m/z*): [M+Na]<sup>+</sup> calculated 345.1227; found 345.1233 for C<sub>16</sub>H<sub>19</sub>FN<sub>2</sub>O<sub>4</sub>Na.

**TLC** (acetic acid:methanol:DCM, 0.1:6:93.9 v/v): R<sub>f</sub> = 0.65 (UV, I<sub>2</sub>, bromocresol green).

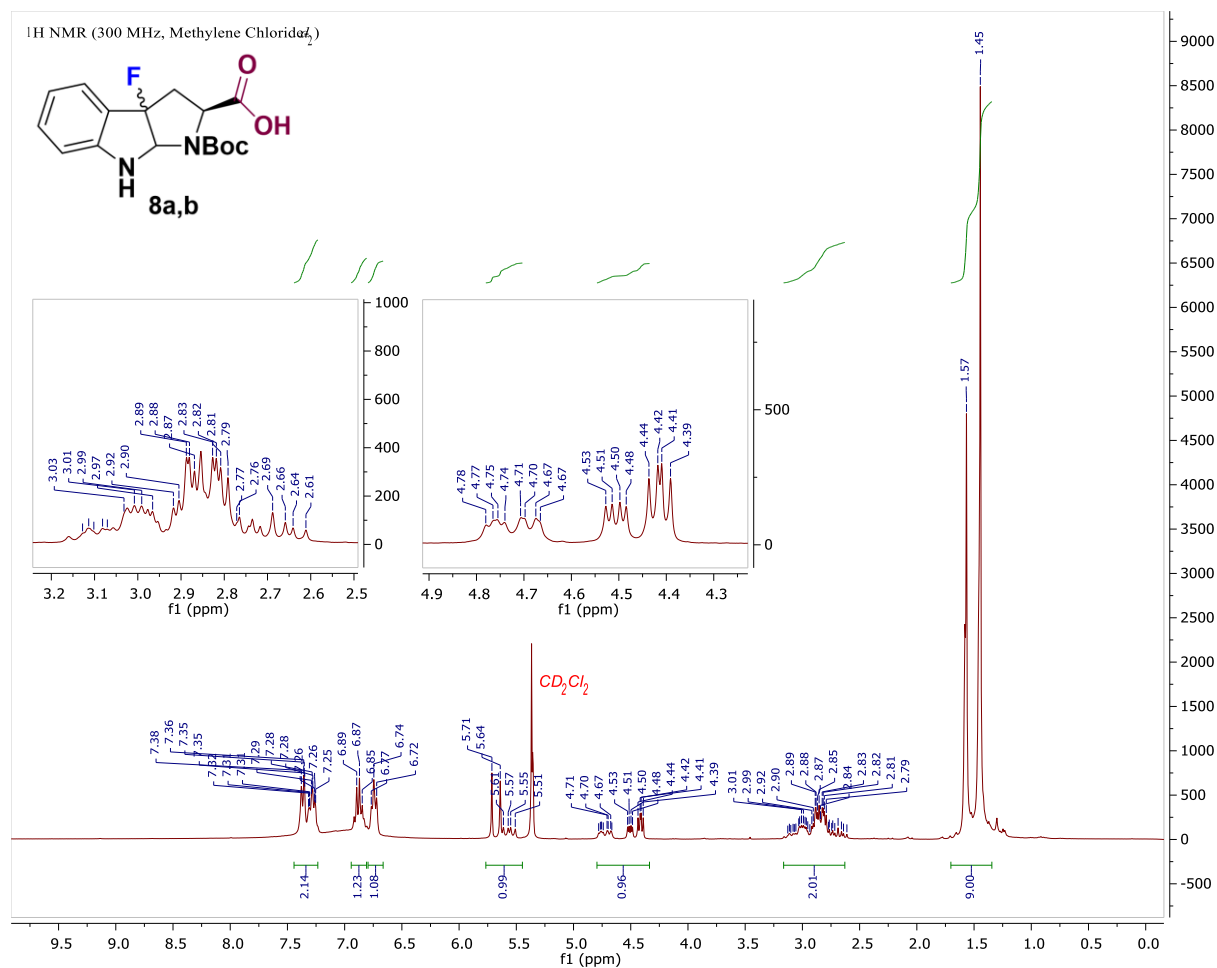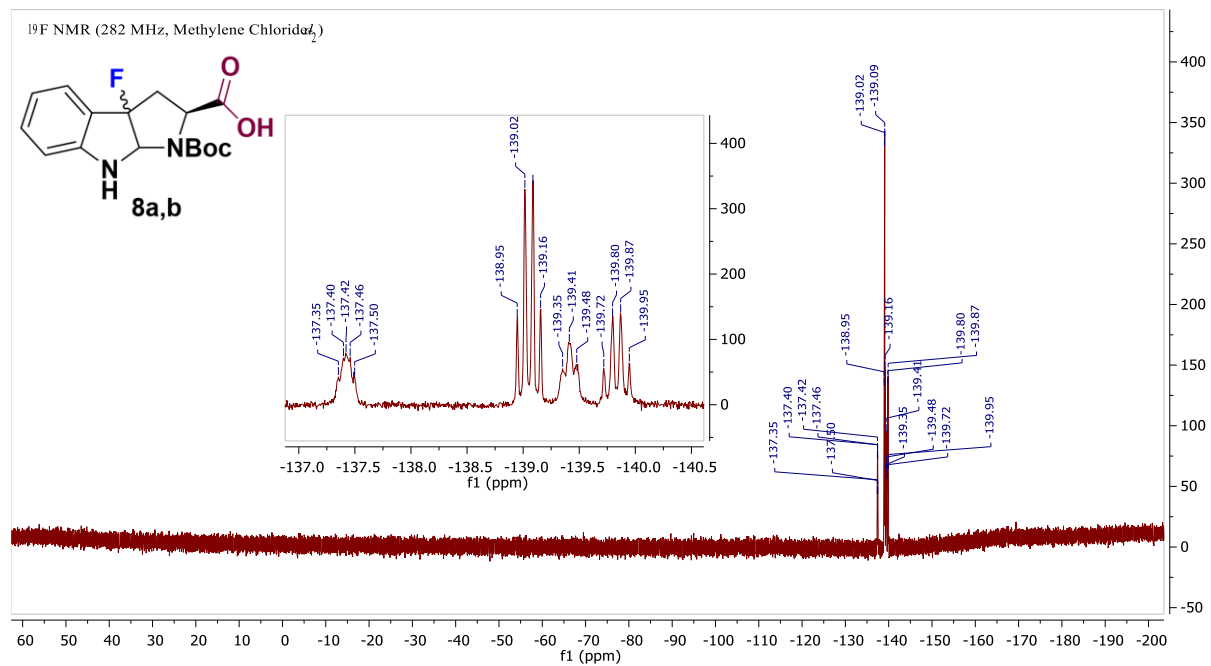

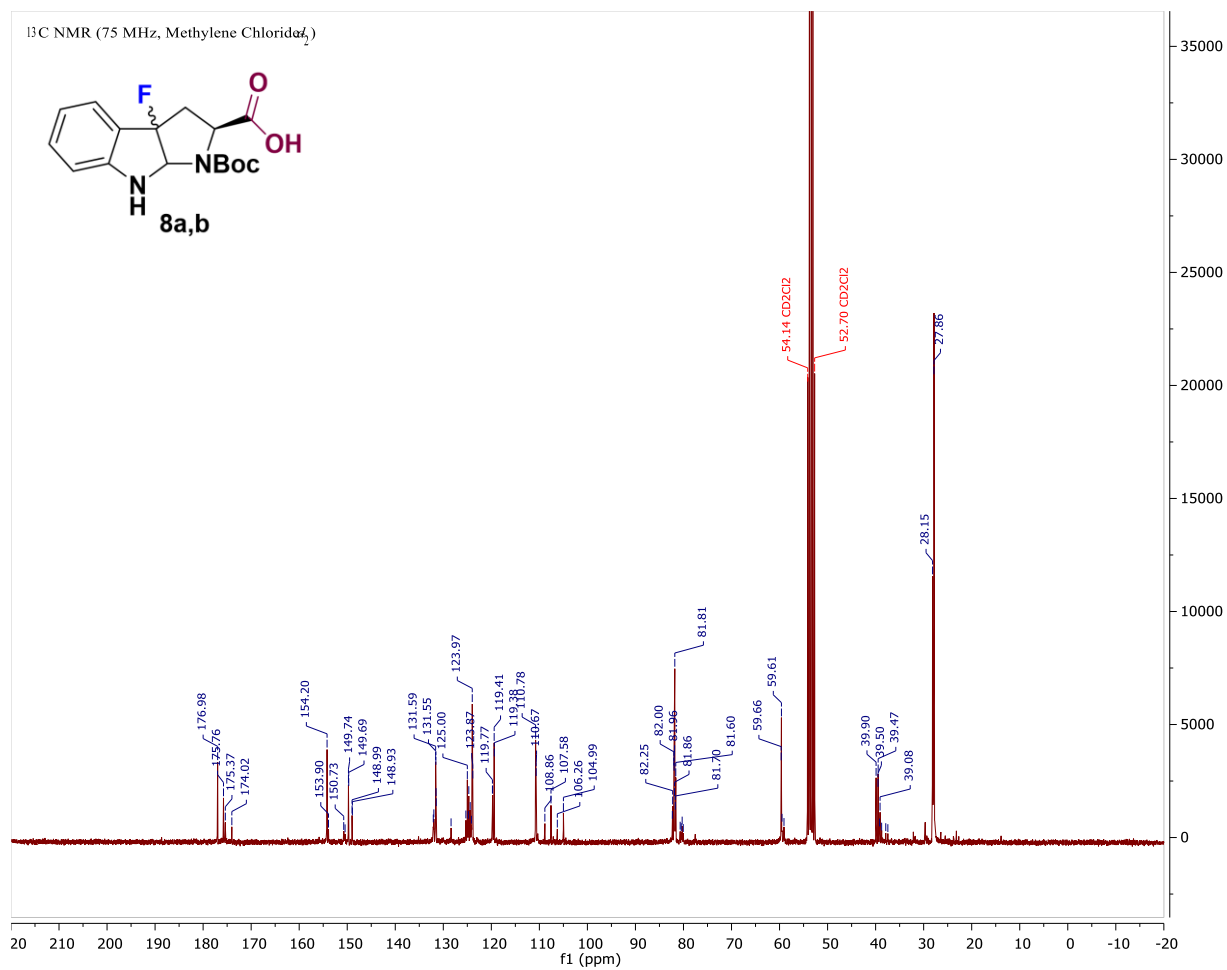



## Synthesis and characterization of compound **9**

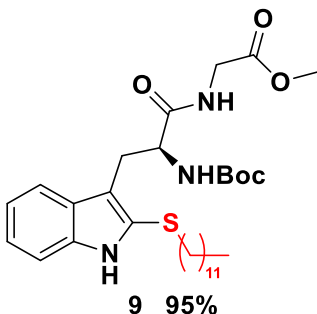

Chemical Formula: C<sub>31</sub>H<sub>49</sub>N<sub>3</sub>O<sub>5</sub>S

Exact Mass: 575.34

Molecular Weight: 575.81

**Methyl (S)-2-(((tert-butoxycarbonyl)amino)-3-(2-(dodecylthio)-1H-indol-3-yl)propanoyl)glycinate (**9**).** A flame-dried round bottom flask under positive Ar atmosphere was charged with N-Boc-FPI-Gly-OMe (**4a,b**, 1 equiv, 35 mg, 0.089 mmol) in 1.42 mL of anhydrous DCM, followed by 1-dodecanethiol (2.5 equiv, 44.9 mg, 53.2  $\mu$ L, 0.222 mmol) and 0.36 mL of HFIP. The reaction contents were stirred for 30 min at 21°C. Upon completion, the crude (light yellow, clear) was concentrated under reduced pressure. The crude was purified by silica gel flash column chromatography (gradient elution, 9:1 to 8:2 petroleum ether/ethyl acetate) to obtain 49 mg (0.085 mmol) of **9** as a beige solid in 95 % yield.

**<sup>1</sup>H NMR** (300 MHz, Methylene Chloride-*d*<sub>2</sub>)  $\delta$  (ppm) 8.56 (s, 1H), 7.60 (d, *J* = 8.0 Hz, 1H), 7.33 (d, *J* = 8.1 Hz, 1H), 7.23 – 7.13 (m, 1H), 7.13 – 7.04 (m, 1H), 6.45 (t, *J* = 5.2 Hz, 1H), 5.34 (s, 1H), 4.42 (q, *J* = 7.0, 6.3 Hz, 1H), 4.03 – 3.78 (m, 2H), 3.68 (s, 3H), 3.42 – 3.19 (m, 2H), 2.87 – 2.70 (m, 2H), 1.57 (p, *J* = 7.5, 7.0 Hz, 2H), 1.37 (s, 9H), 1.32 – 1.19 (m, 18H), 0.93 – 0.85 (m, 3H).

**<sup>13</sup>C NMR** (75 MHz, Methylene Chloride-*d*<sub>2</sub>)  $\delta$  (ppm) 13.99, 22.80, 28.06, 28.19, 28.80, 29.29, 29.46, 29.64, 29.70, 29.74, 30.25, 32.03, 36.90, 41.33, 52.25, 55.38, 79.92, 110.79, 116.19, 119.04, 119.86, 123.00, 127.37, 127.90, 136.77, 155.46, 169.98, 171.94.

**HRMS** (ESI-TOF, *m/z*): [M+Na]<sup>+</sup> calculated 598.3291; found 598.3293 for C<sub>31</sub>H<sub>49</sub>N<sub>3</sub>O<sub>5</sub>SNa.

**TLC** (petroleum ether:ethyl acetate 8:2 v/v): R<sub>f</sub> = 0.5 (UV, I<sub>2</sub>, potassium permanganate).

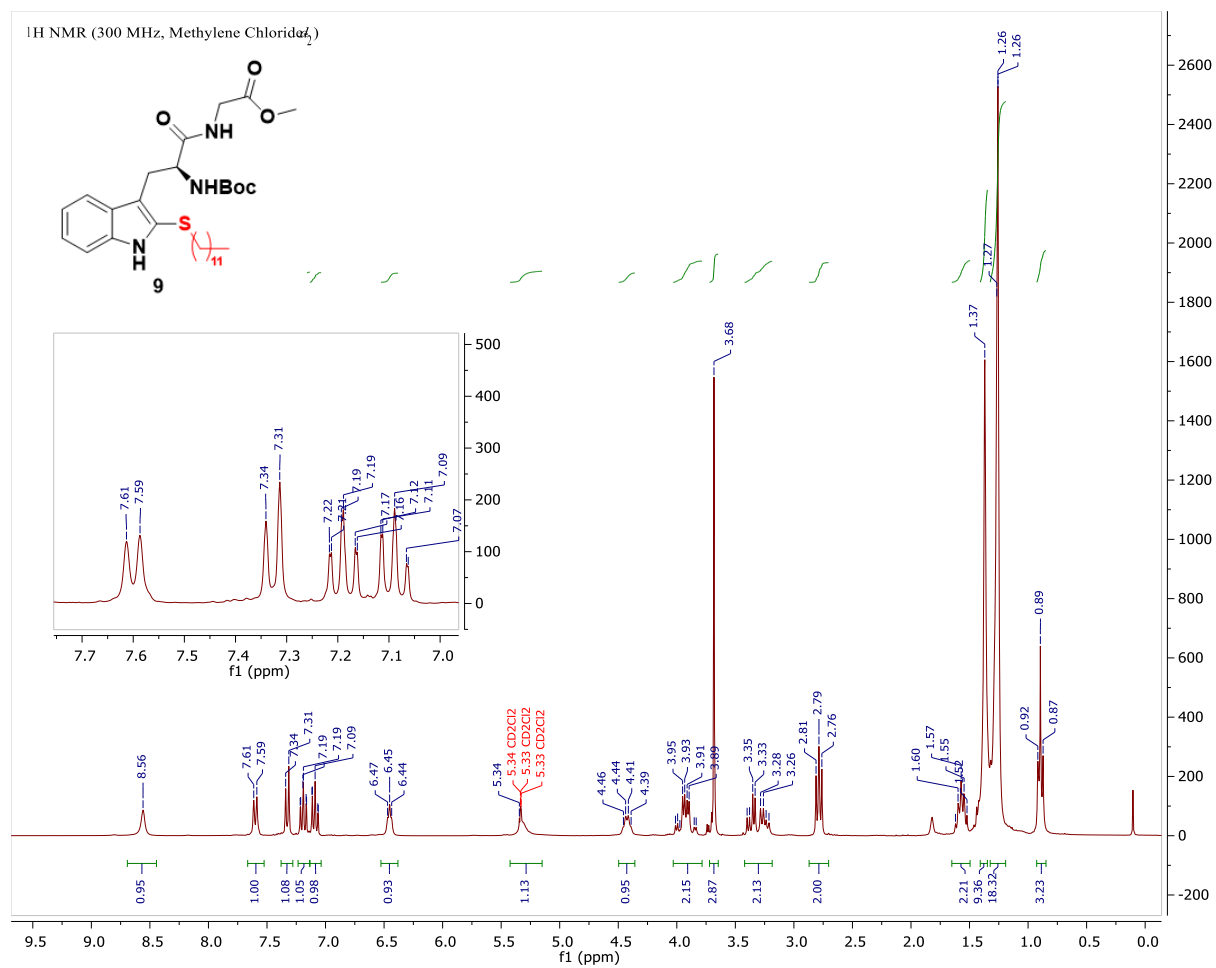

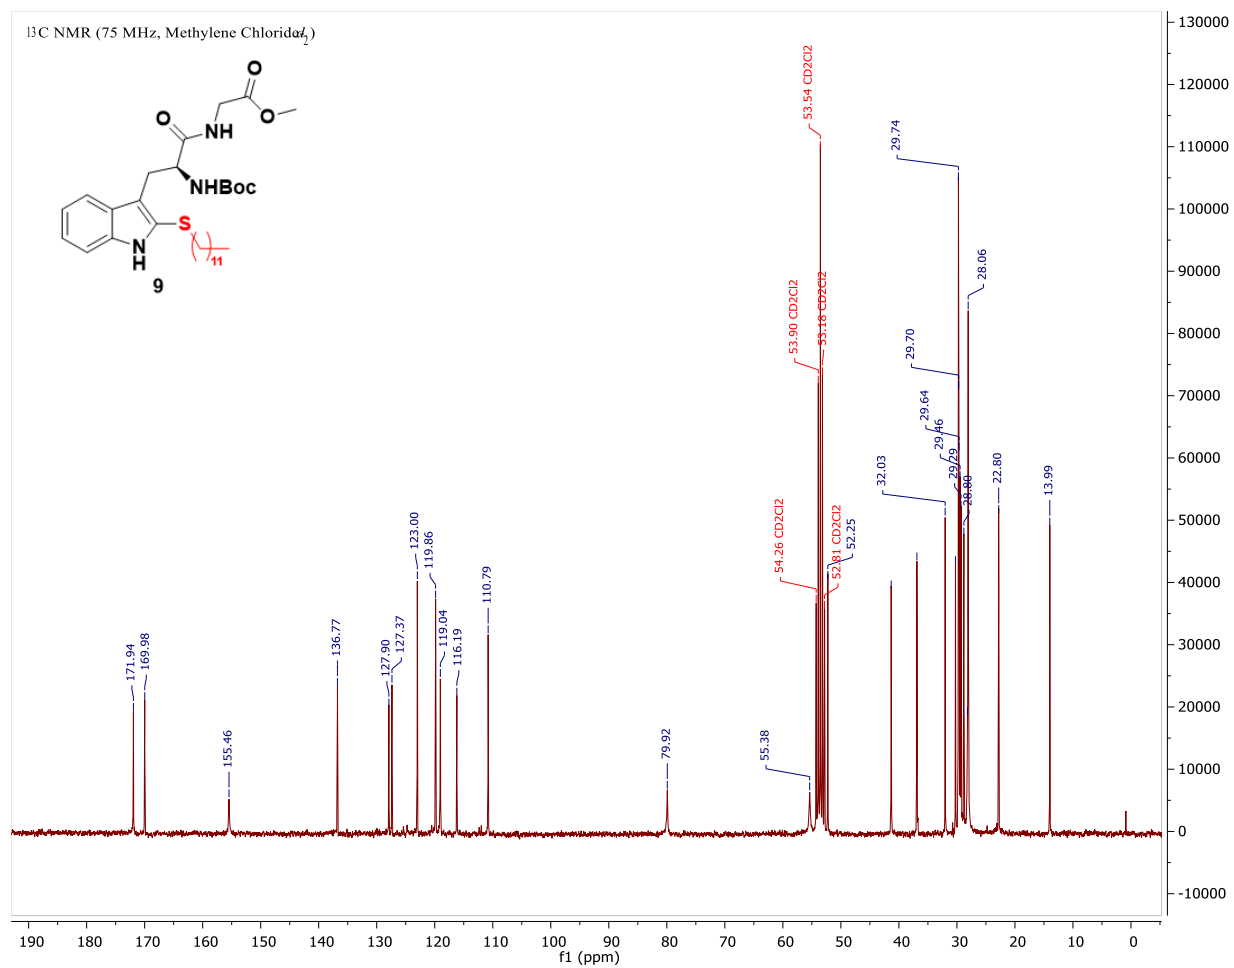

## Synthesis and characterization of compound **10**

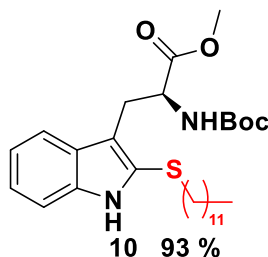

**Chemical Formula:** C<sub>29</sub>H<sub>46</sub>N<sub>2</sub>O<sub>4</sub>S

**Exact Mass:** 518.3178

**Molecular Weight:** 518.7570

**Methyl (S)-2-((tert-butoxycarbonyl)amino)-3-(2-(dodecylthio)-1H-indol-3-yl)propanoate (10).** A flame-dried round bottom flask was charged with N-Boc-FPI-OMe (**6a,b**, 1 equiv, 100 mg, 0.30 mmol) in 4.1 mL of anhydrous DCM, followed by 1-dodecanethiol (2.5 equiv, 150 mg, 178  $\mu$ L, 0.74 mmol) and 1.8 mL of HFIP. The reaction contents were stirred for 30 min at 21 °C. Upon completion, the crude reaction mixture (light yellow, clear) was concentrated under reduced pressure. The concentrate was purified by silica gel flash column chromatography (isocratic elution, 1:9 ethyl acetate/hexane) to obtain 143 mg (0.28 mmol) of **10** as a white solid in 93 % yield.

**<sup>1</sup>H NMR** (300 MHz, Methylene Chloride-*d*<sub>2</sub>)  $\delta$  (ppm) 8.46 (br s, 1H), 7.54 (d, *J* = 7.9 Hz, 1H), 7.32 (d, *J* = 8.0 Hz, 1H), 7.26 – 7.16 (m, 1H), 7.16 – 6.99 (m, 1H), 5.19 (br d, *J* = 7.9 Hz, 1H), 4.58 (q, *J* = 6.4 Hz, 1H), 3.69 (s, 3H), 3.33 (tq, *J* = 14.2, 6.6, 6.2 Hz, 2H), 2.78 (t, *J* = 7.4 Hz, 2H), 1.62 – 1.52 (m, 2H), 1.40 (s, 9H), 1.33 – 1.27 (m, 18H), 0.91 (t, *J* = 6.7 Hz, 3H).

**<sup>13</sup>C NMR** (75 MHz, Methylene Chloride-*d*<sub>2</sub>)  $\delta$  (ppm) 14.48, 23.28, 28.45, 28.63, 29.24, 29.76, 29.94, 30.11, 30.17, 30.22, 30.67, 32.51, 37.34, 52.73, 54.84, 80.05, 111.30, 116.13, 119.32, 120.29, 123.41, 128.03, 128.55, 137.20, 155.62, 173.28.

**HRMS** (ESI-TOF, *m/z*): [M+Na]<sup>+</sup> calculated 518.3178; found 518.3179 for C<sub>29</sub>H<sub>46</sub>N<sub>2</sub>O<sub>4</sub>SNa.

**TLC** (ethyl acetate:hexane 1:2 v/v): R<sub>f</sub> = 0.7 (UV, I<sub>2</sub>, potassium permanganate).

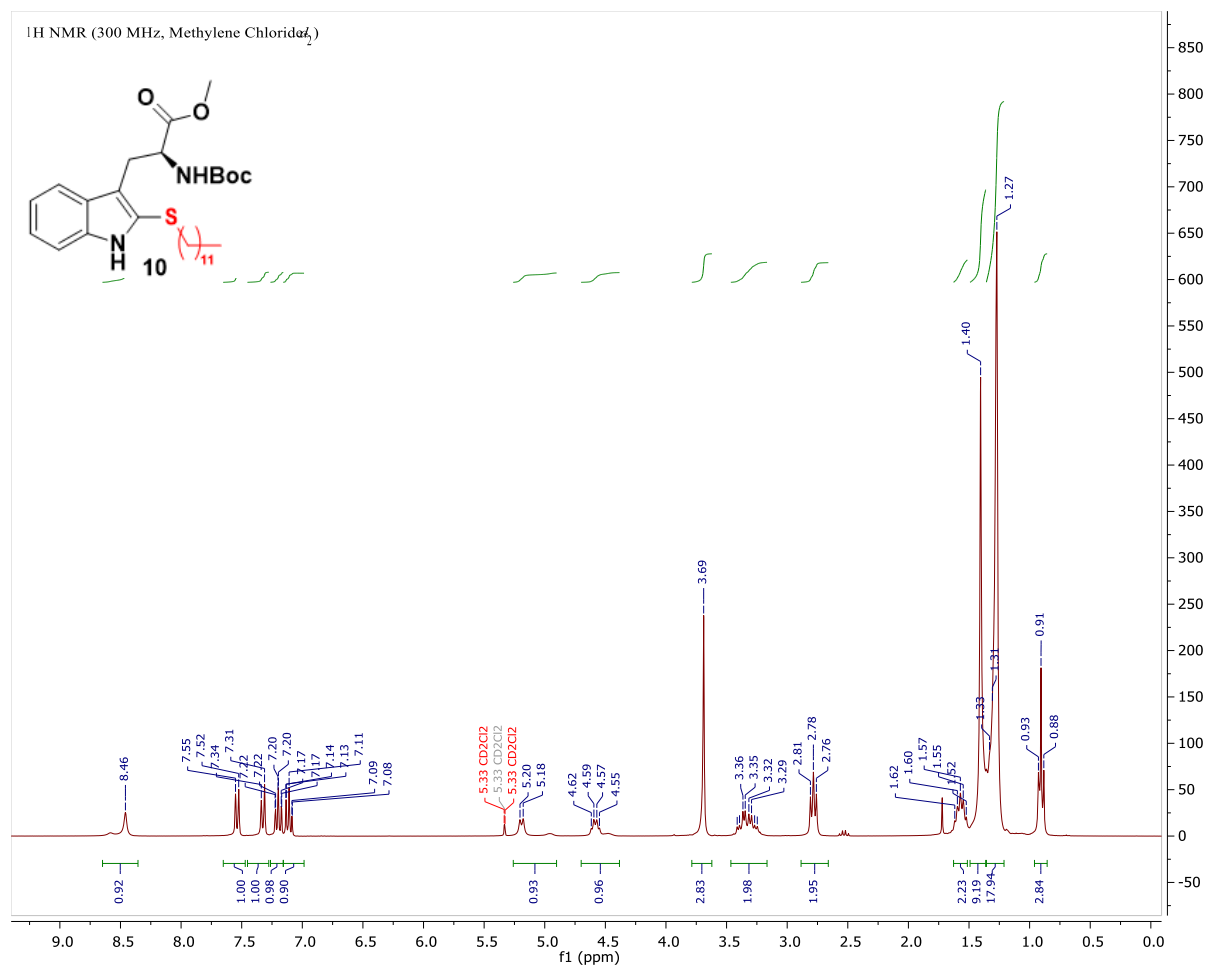

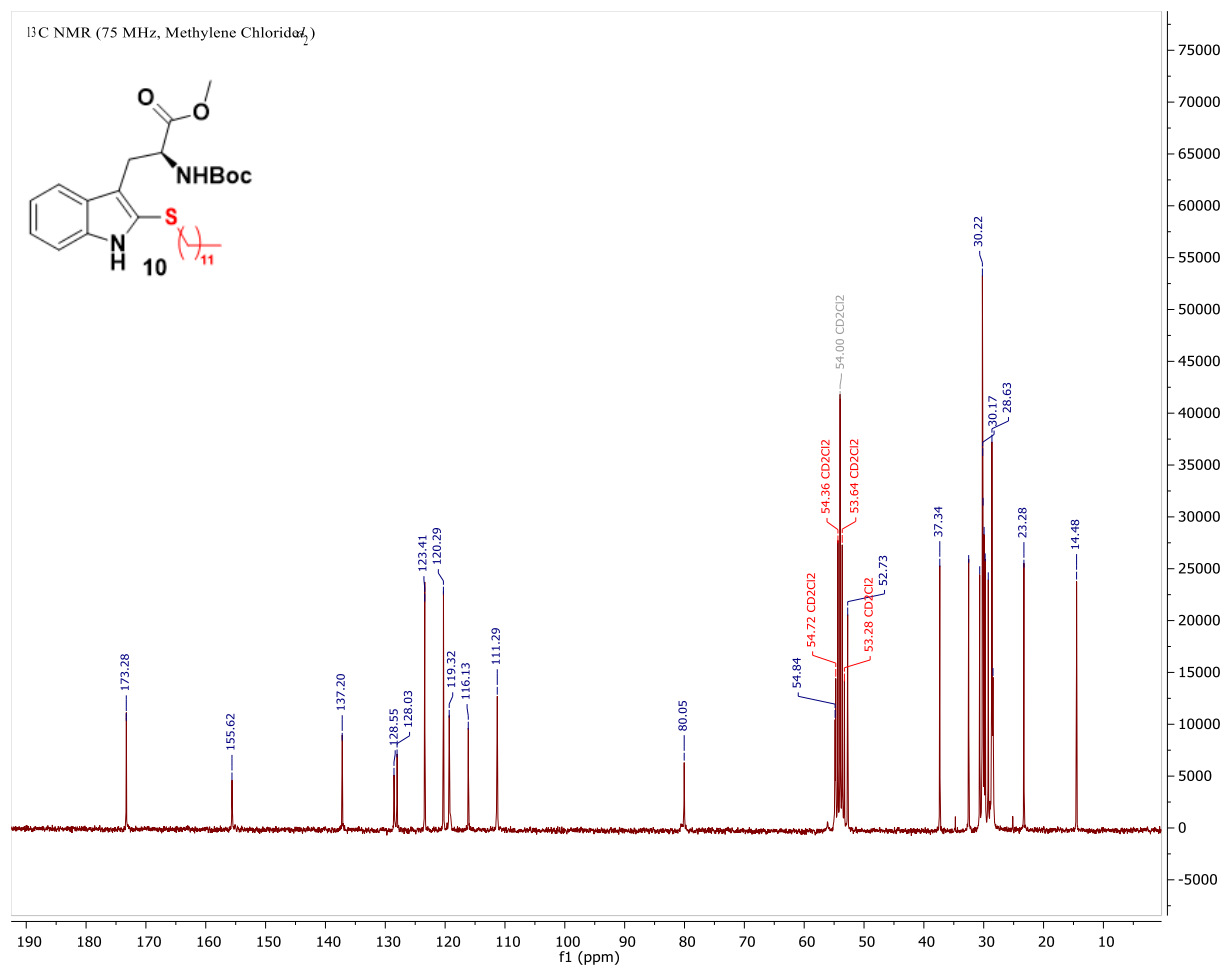

## Synthesis and characterization of compound **11**

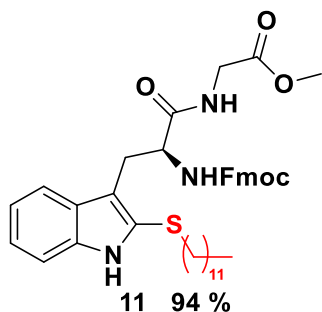

**Chemical Formula:** C<sub>41</sub>H<sub>51</sub>N<sub>3</sub>O<sub>5</sub>S

**Exact Mass:** 697.3549

**Molecular Weight:** 697.9350

**Methyl (S)-2-((((9H-fluoren-9-yl)methoxy)carbonyl)amino)-3-(2-(dodecylthio)-1H-indol-3-yl)propanoyl)glycinate (**11**).** A flame-dried round bottom flask was charged with N-Fmoc-FPI-Gly-OMe (**3a,b**, 1 equiv, 78 mg, 0.15 mmol) in 2.1 mL of anhydrous DCM, followed by 1-dodecanethiol (2.5 equiv, 76.6 mg, 90  $\mu$ L, 0.38 mmol) and 0.9 mL of HFIP. The reaction contents were stirred for 30 min at 21°C. Upon completion, the crude reaction mixture (light yellow, clear) was concentrated under reduced pressure. The concentrate was purified by silica gel flash column chromatography (gradient elution, 3:7 to 4.5:5.5 ethyl acetate/hexane) to obtain 98 mg (0.085 mmol) of **11** as a white solid in 94 % yield.

**<sup>1</sup>H NMR** (300 MHz, Methylene Chloride-*d*<sub>2</sub>)  $\delta$  (ppm) 8.55 (br s, 1H), 7.78 (d, *J* = 7.5 Hz, 2H), 7.60 (dd, *J* = 23.0, 7.6 Hz, 3H), 7.41 (t, *J* = 7.5 Hz, 2H), 7.37 – 7.25 (m, 3H), 7.23 – 7.16 (m, 1H), 7.15 – 7.05 (m, 1H), 6.42 (br t, *J* = 5.4 Hz, 1H), 5.76 (br d, *J* = 7.3 Hz, 1H), 4.52 (q, *J* = 5.7 Hz, 1H), 4.35 – 4.28 (m, 2H), 4.19 (t, *J* = 7.0 Hz, 1H), 3.93 (qd, *J* = 18.2, 5.1 Hz, 2H), 3.66 (s, 3H), 3.46 – 3.26 (m, 2H), 2.78 (t, *J* = 7.5 Hz, 2H), 1.65 – 1.47 (m, 2H), 1.37 – 1.25 (m, 18H), 0.98 – 0.85 (t, *J* = 6.5 Hz, 3H).

**<sup>13</sup>C NMR** (75 MHz, Methylene Chloride-*d*<sub>2</sub>)  $\delta$  (ppm) 14.03, 22.82, 28.24, 28.81, 29.31, 29.48, 29.66, 29.73, 29.76, 30.27, 32.05, 36.93, 41.39, 47.23, 52.30, 55.81, 67.20, 110.90, 116.06, 118.93, 120.01, 123.13, 125.29, 125.31, 127.15, 127.42, 127.74, 127.87, 136.78, 141.34, 144.01, 144.07, 156.08, 169.93, 171.55.

**HRMS** (ESI-TOF, *m/z*): [M+H]<sup>+</sup> calculated 687.3549; found 697.3552 for C<sub>41</sub>H<sub>52</sub>N<sub>3</sub>O<sub>5</sub>S.

**TLC** (ethyl acetate:hexane 3:7 v/v): R<sub>f</sub> = 0.4 (UV, I<sub>2</sub>, potassium permanganate).

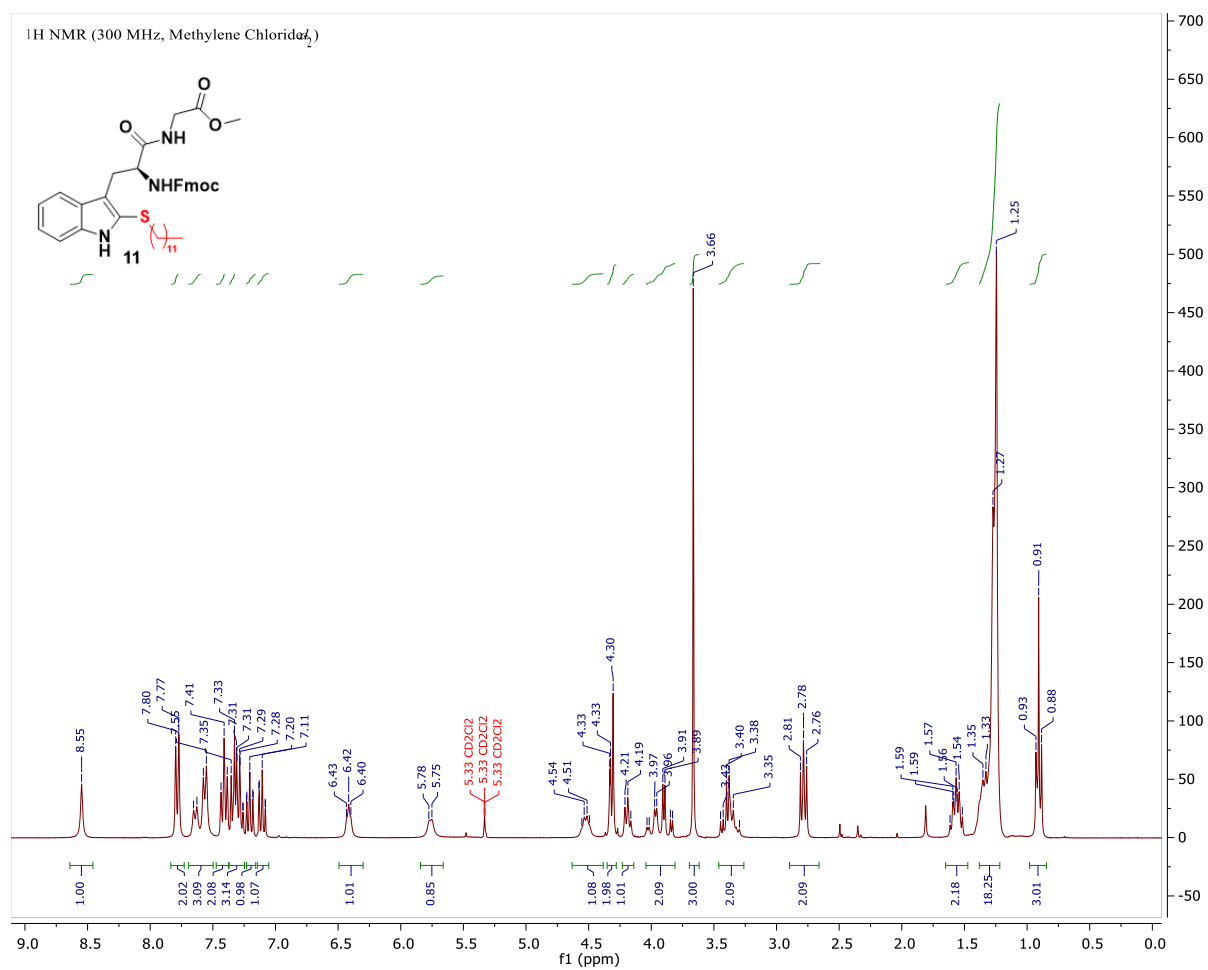



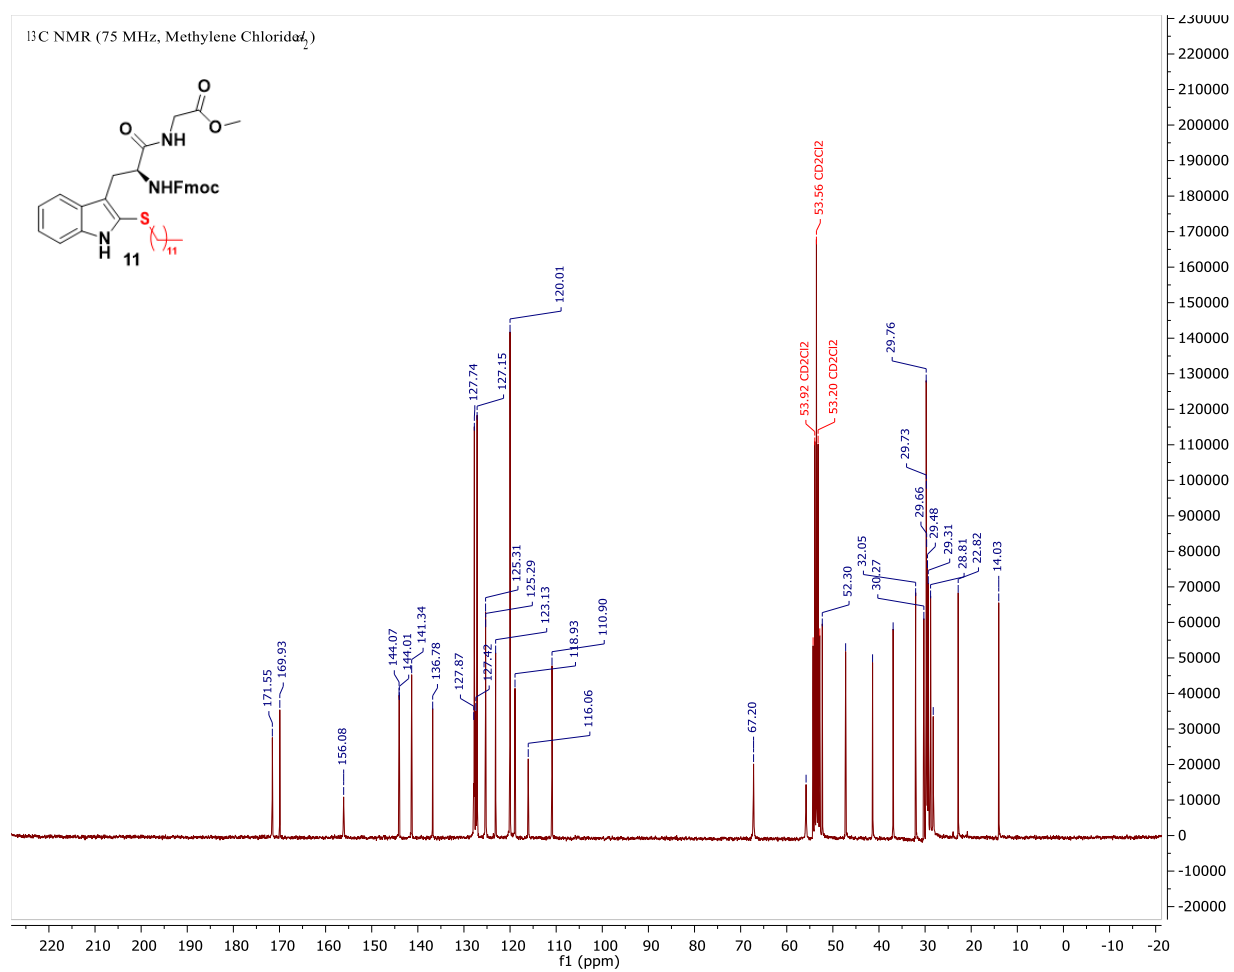

## Synthesis and characterization of compound **12**

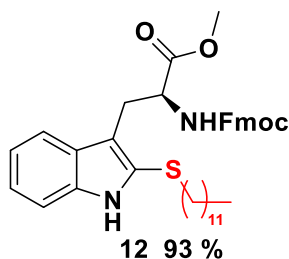

**Chemical Formula:** C<sub>39</sub>H<sub>48</sub>N<sub>2</sub>O<sub>4</sub>S

**Exact Mass:** 640.33

**Molecular Weight:** 640.88

### **Methyl (S)-2-(((9H-fluoren-9-yl)methoxy)carbonyl)amino)-3-(2-(dodecylthio)-1H-indol-3-yl)propanoate (**12**).**

A flame-dried round bottom flask under positive Ar atmosphere was charged with N-Fmoc-FPI-OMe (**5a,b**, 1 equiv, 100 mg, 0.22 mmol) in 2.5 mL of anhydrous DCM, followed by 1-dodecanethiol (2.5 equiv, 110 mg, 131  $\mu$ L, 0.55 mmol) and 0.62 mL of HFIP. The reaction contents were stirred for 30 min at 21 °C. Upon completion, the crude (yellow, clear) was concentrated under reduced pressure. The crude was purified by silica gel flash column chromatography (gradient elution, 9:1 to 8:2 petroleum ether/ethyl acetate) to obtain 130 mg (0.20 mmol) of **12** as a light yellow solid in 93 % yield.

**<sup>1</sup>H NMR** (300 MHz, Methylene Chloride-*d*<sub>2</sub>)  $\delta$  (ppm) 8.30 (s, 1H), 7.78 (d, *J* = 7.5 Hz, 2H), 7.64 – 7.46 (m, 3H), 7.46 – 7.26 (m, 5H), 7.25 – 7.18 (m, 1H), 7.16 – 7.08 (m, 1H), 5.50 (d, *J* = 8.3 Hz, 1H), 4.66 (q, *J* = 6.8 Hz, 1H), 4.35 – 4.14 (m, 3H), 3.71 (s, 3H), 3.39 (qd, *J* = 14.3, 6.2 Hz, 2H), 2.78 (t, *J* = 7.4 Hz, 2H), 1.64 – 1.50 (m, 2H), 1.26 (d, *J* = 5.7 Hz, 18H), 0.90 (t, *J* = 6.6 Hz, 3H).

**<sup>13</sup>C NMR** (75 MHz, Methylene Chloride-*d*<sub>2</sub>)  $\delta$  (ppm) 14.46, 23.27, 28.36, 29.20, 29.74, 29.92, 30.09, 30.15, 30.20, 30.68, 32.49, 37.38, 47.71, 52.89, 55.19, 67.49, 111.32, 116.05, 119.18, 120.42, 120.48, 123.55, 125.76, 127.57, 128.06, 128.17, 128.46, 137.14, 141.77, 144.55, 156.13, 172.90.

**HRMS** (ESI-TOF, *m/z*): [M+H]<sup>+</sup> calculated 641.3413; found 641.3414 for C<sub>39</sub>H<sub>49</sub>N<sub>2</sub>O<sub>4</sub>S.

**TLC** (petroleum ether:ethyl acetate 8:2 v/v): R<sub>f</sub> = 0.6 (UV, I<sub>2</sub>, potassium permanganate).

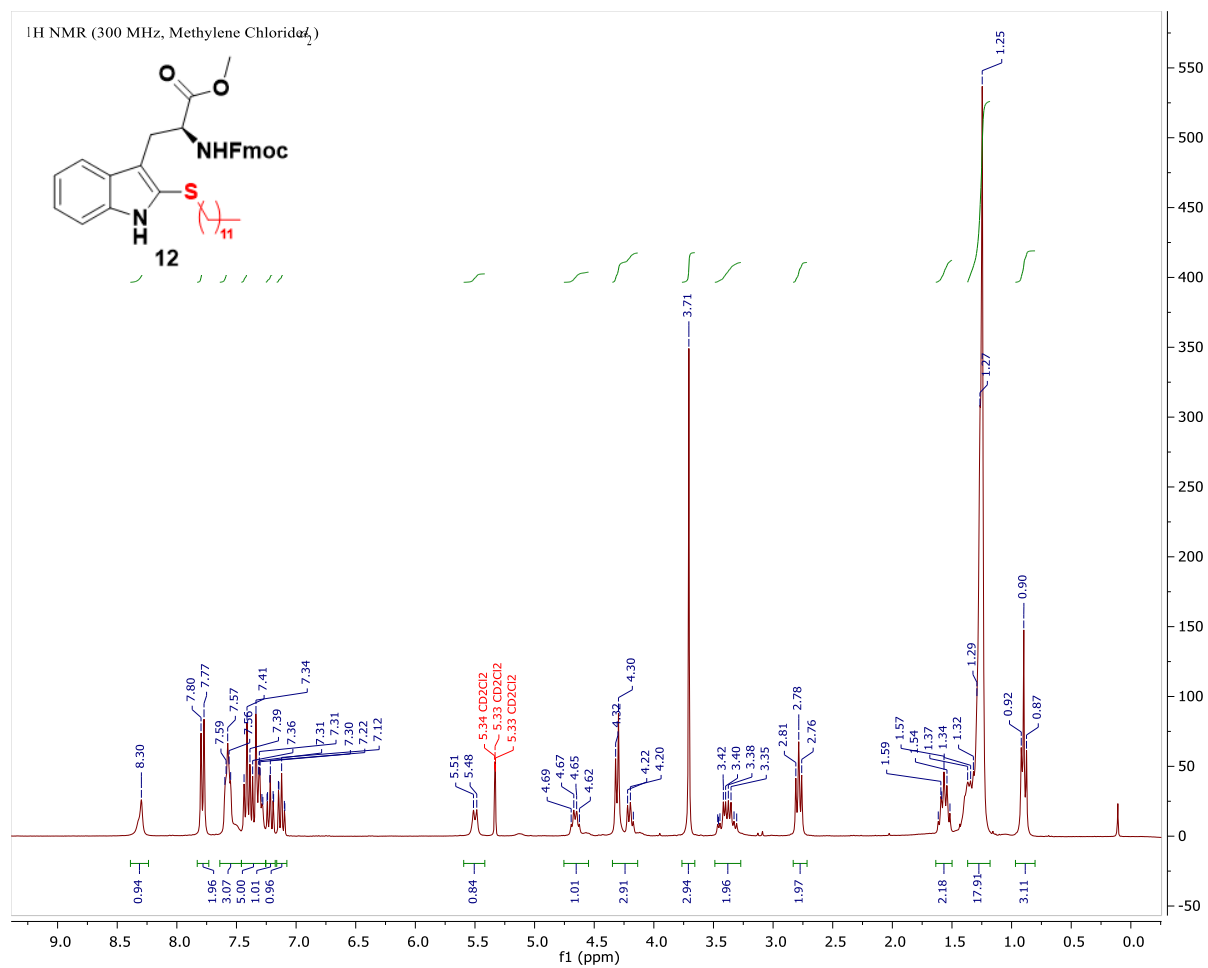

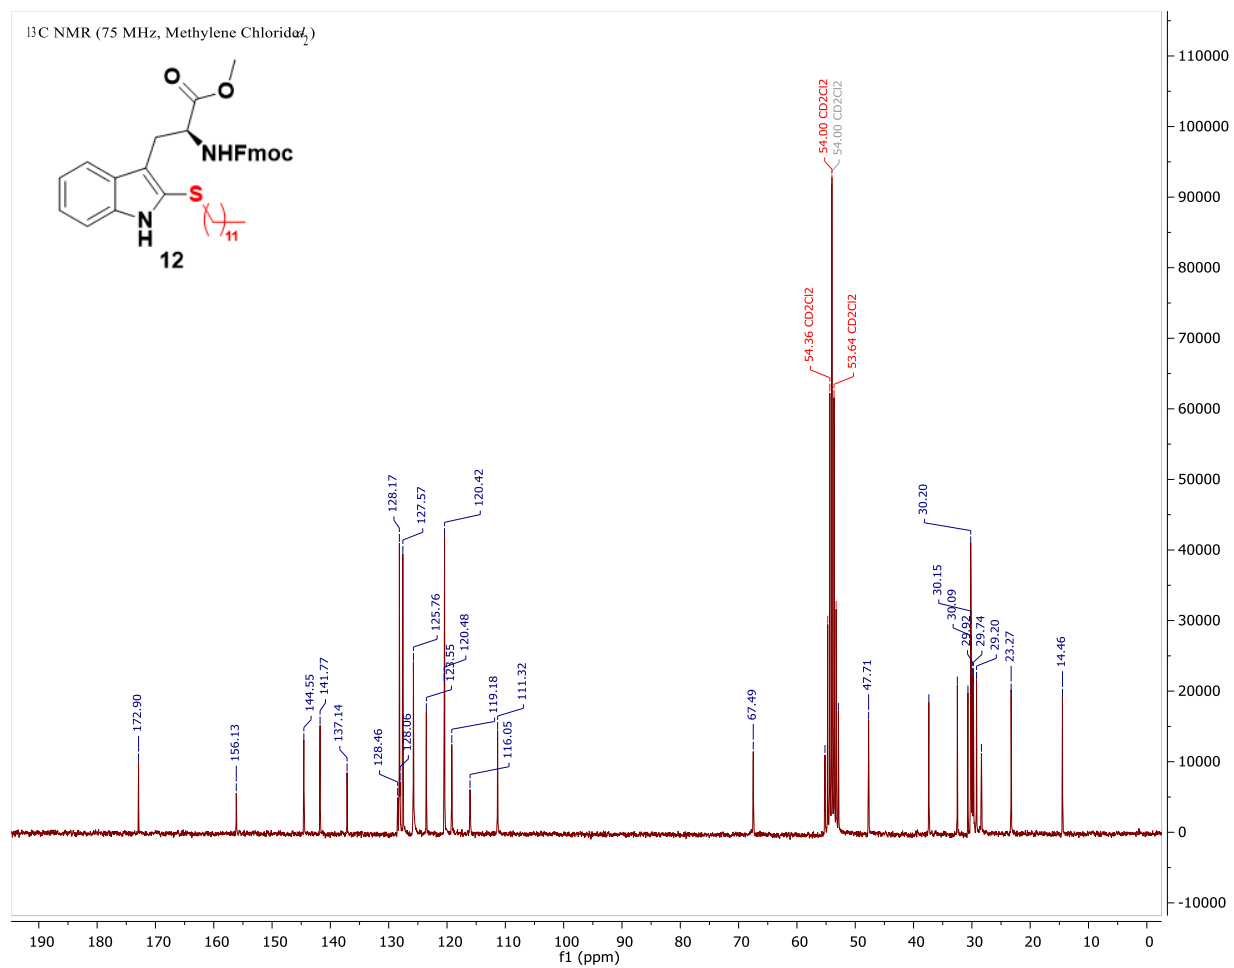

## Procedures for Table 1, Entries 1 – 8

**Table 1, Entry 1.** A flame-dried round bottom flask under positive Ar atmosphere was charged with N-Boc-FPI-Gly-OMe (**4a,b**, 1 equiv, 35 mg, 0.089 mmol) in 1.78 mL of anhydrous DCM, followed by 1-dodecanethiol (2.5 equiv, 44.9 mg, 53.2  $\mu$ L, 0.222 mmol) and B-chlorocatecholborane (1.2 equiv, 17 mg, 0.110 mmol). The reaction contents were stirred for 1 h at 21 °C. Upon completion, the crude (light brown, clear) was concentrated under reduced pressure. The crude was purified by silica gel flash column chromatography (gradient elution, 9:1 to 8:2 petroleum ether/ethyl acetate) to obtain 45 mg (0.079 mmol) of **9** as a beige solid in 89 % yield.

**Table 1, Entry 2.** A flame-dried round bottom flask under positive Ar atmosphere was charged with N-Boc-FPI-Gly-OMe (**4a,b**, 1 equiv, 35 mg, 0.089 mmol) in 1.78 mL of anhydrous ACN, followed by 1-dodecanethiol (2.5 equiv, 44.9 mg, 53.2  $\mu$ L, 0.222 mmol) and anhydrous CeCl<sub>3</sub> (1.5 equiv, 33 mg, 0.134 mmol). The reaction contents were stirred for 3 h at 50 °C. Upon completion, the crude (yellow, clear) was filtered and concentrated under reduced pressure. The crude was purified by silica gel flash column chromatography (gradient elution, 9:1 to 8:2 petroleum ether/ethyl acetate) to obtain 46 mg (0.080 mmol) of **9** as a beige solid in 90 % yield.

**Table 1, Entry 3.** A flame-dried round bottom flask under positive Ar atmosphere was charged with N-Boc-FPI-Gly-OMe (**4a,b**, 1 equiv, 35 mg, 0.089 mmol) in 1.78 mL of anhydrous DMF, followed by 1-dodecanethiol (2.5 equiv, 44.9 mg, 53.2  $\mu$ L, 0.222 mmol) and BaCl<sub>2</sub> (1.5 equiv, 28 mg, 0.134 mmol). The reaction contents were stirred for 3 h at 65 °C. Upon completion, the crude (yellow, clear) was filtered and concentrated under reduced pressure. The crude was purified by silica gel flash column chromatography (gradient elution, 9:1 to 8:2 petroleum ether/ethyl acetate) to obtain 44 mg (0.076 mmol) of **9** as a beige solid in 85 % yield.

**Table 1, Entry 4.** A flame-dried round bottom flask under positive Ar atmosphere was charged with N-Boc-FPI-Gly-OMe (**4a,b**, 1 equiv, 35 mg, 0.089 mmol) in 1.78 mL of anhydrous DCM, followed by 1-dodecanethiol (2.5 equiv, 44.9 mg, 53.2  $\mu$ L, 0.222 mmol) and BF<sub>3</sub>·O(Et)<sub>2</sub> (1.2 equiv, 15.6 mg, 13.8  $\mu$ L, 0.110 mmol). The reaction contents were stirred for 1 h at 21 °C. Upon completion, the crude (light brown, clear) was concentrated under reduced pressure. The crude was purified by silica gel flash column chromatography (gradient elution, 9:1 to 8:2 petroleum ether/ethyl acetate) to obtain 42 mg (0.072 mmol) of **9** as a beige solid in 81 % yield.

**Table 1, Entry 5.** A flame-dried round bottom flask under positive Ar atmosphere was charged with N-Boc-FPI-Gly-OMe (**4a,b**, 1 equiv, 35 mg, 0.089 mmol) in 1.78 mL of anhydrous DCM, followed by 1-dodecanethiol (2.5 equiv, 44.9 mg, 53.2  $\mu$ L, 0.222 mmol) and trifluoroacetic acid (2 equiv, 20.3 mg, 13.6  $\mu$ L, 0.178 mmol). The reaction contents were stirred for 30 min at 21 °C. Upon completion, the crude (beige, clear) was concentrated under reduced pressure. The crude was purified by silica gel flash column chromatography (gradient elution, 9:1 to 8:2 petroleum ether/ethyl acetate) to obtain 49 mg (0.085 mmol) of **9** as a beige solid in 95 % yield.

**Table 1, Entry 6.** A flame-dried round bottom flask under positive Ar atmosphere was charged with N-Boc-FPI-Gly-OMe (**4a,b**, 1 equiv, 35 mg, 0.089 mmol) in 1.78 mL of anhydrous ACN, followed by 1-dodecanethiol (2.5 equiv, 44.9 mg, 53.2  $\mu$ L, 0.222 mmol) and anhydrous CeCl<sub>3</sub> (0.2 equiv, 4.4 mg, 17.8  $\mu$ mol). The reaction contents were stirred for 5 h at 60 °C. Upon completion, the crude (yellow, clear) was filtered and concentrated under reduced pressure. The crude was purified by silica gel flash column chromatography (gradient elution, 9:1 to 8:2 petroleum ether/ethyl acetate) to obtain 48 mg (0.083 mmol) of **9** as a beige solid in 93 % yield.

**Table 1, Entry 8.** A flame-dried round bottom flask under positive Ar atmosphere was charged with N-Boc-FPI-Gly-OMe (**4a,b**, 1 equiv, 35 mg, 0.089 mmol) in 1.42 mL of anhydrous DCM, followed by 1-dodecanethiol (2.5 equiv, 44.9 mg, 53.2  $\mu$ L, 0.222 mmol) and 0.36 mL of trifluoroethanol. The reaction contents were stirred for 2 h at 21 °C. Upon completion, the crude (light yellow, clear) was concentrated under reduced pressure. The was purified by silica gel flash column chromatography (gradient elution, 9:1 to 8:2 petroleum ether/ethyl acetate) obtain 46 mg (0.080 mmol) of **9** as a beige solid in 90 % yield.

## Synthesis and characterization of compound **13a,b**

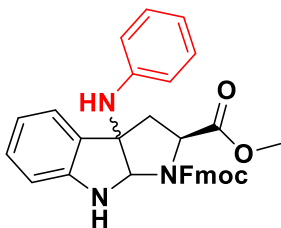

**13a,b** 95%<sup>c,e,f</sup>

Chemical Formula: C<sub>33</sub>H<sub>29</sub>N<sub>3</sub>O<sub>4</sub>

Exact Mass: 531.22

Molecular Weight: 531.61

**1-((9H-fluoren-9-yl)methyl) 2-methyl (2S)-3a-(phenylamino)-3,3a,8,8a-tetrahydropyrrolo[2,3-b]indole-1,2(2H)-dicarboxylate (13a,b).** A flame-dried round bottom flask under positive Ar atmosphere was charged with N-Fmoc-FPI-OMe (**5a,b**, 1 equiv, 0.070 mg, 0.153 mmol) in 2.4 mL of anhydrous dichloroethane (DCE) followed by aniline (5 equiv, 71 mg, 70  $\mu$ L, 0.764 mmol) and 0.6 mL of HFIP. The reaction contents were stirred at 50°C for 2 h. Upon completion, the solvent was evaporated under reduced pressure and the crude was purified by silica gel flash column chromatography (gradient elution, 100 % petroleum ether to 2:8 petroleum ether/diethyl ether) to afford 77 mg (0.145 mmol) of **13a,b** as a white solid in 95 % yield.

**<sup>1</sup>H NMR** (300 MHz, Methylene Chloride-*d*<sub>2</sub>) major diastereomer and rotamers, *syn-cis*,  $\delta$  (ppm) 7.86 – 7.70 (m, 2H), 7.66 – 7.43 (m, 3H), 7.43 – 7.25 (m, 3H), 7.22 – 7.02 (m, 4H), 6.86 – 6.52 (m, 3H), 6.46 (d, *J* = 7.7 Hz, 1H), 6.40 – 6.29 (m, 1H), 5.94, 5.68, 5.40 (two s, 1H), 4.74 – 4.58 (m, 1H), 4.47 – 3.87 (m, 4H), 3.70, 3.74, 3.25, 3.20 (four s, 3H), 2.74 – 2.37 (m, 2H).

**<sup>13</sup>C NMR** (75 MHz, Methylene Chloride-*d*<sub>2</sub>) major diastereomer and rotamers, *syn-cis*,  $\delta$  (ppm) 42.01, 42.92, 47.28, 47.36, 52.56, 58.45, 58.61, 66.58, 67.70, 71.62, 72.38, 78.41, 79.38, 109.68, 110.08, 115.45, 115.67, 118.58, 118.72, 119.09, 119.26, 120.03, 120.12, 122.87, 123.01, 124.63, 124.88, 124.95, 125.04, 127.17, 127.41, 127.45, 127.77, 127.83, 127.98, 129.12, 129.24, 129.64, 129.76, 130.07, 130.36, 141.22, 141.33, 141.39, 141.67, 144.04, 144.14, 144.20, 145.15, 145.19, 147.71, 148.03, 154.33, 154.96, 172.93, 173.22.

**HRMS** (ESI-TOF, *m/z*): [M+Na]<sup>+</sup> calculated 554.2056; found 554.2076 C<sub>33</sub>H<sub>29</sub>N<sub>3</sub>O<sub>4</sub>Na.

**TLC** (hexane:ethyl acetate, 1:1 v/v): R<sub>f</sub> = 0.65 (UV, I<sub>2</sub>, potassium permanganate).

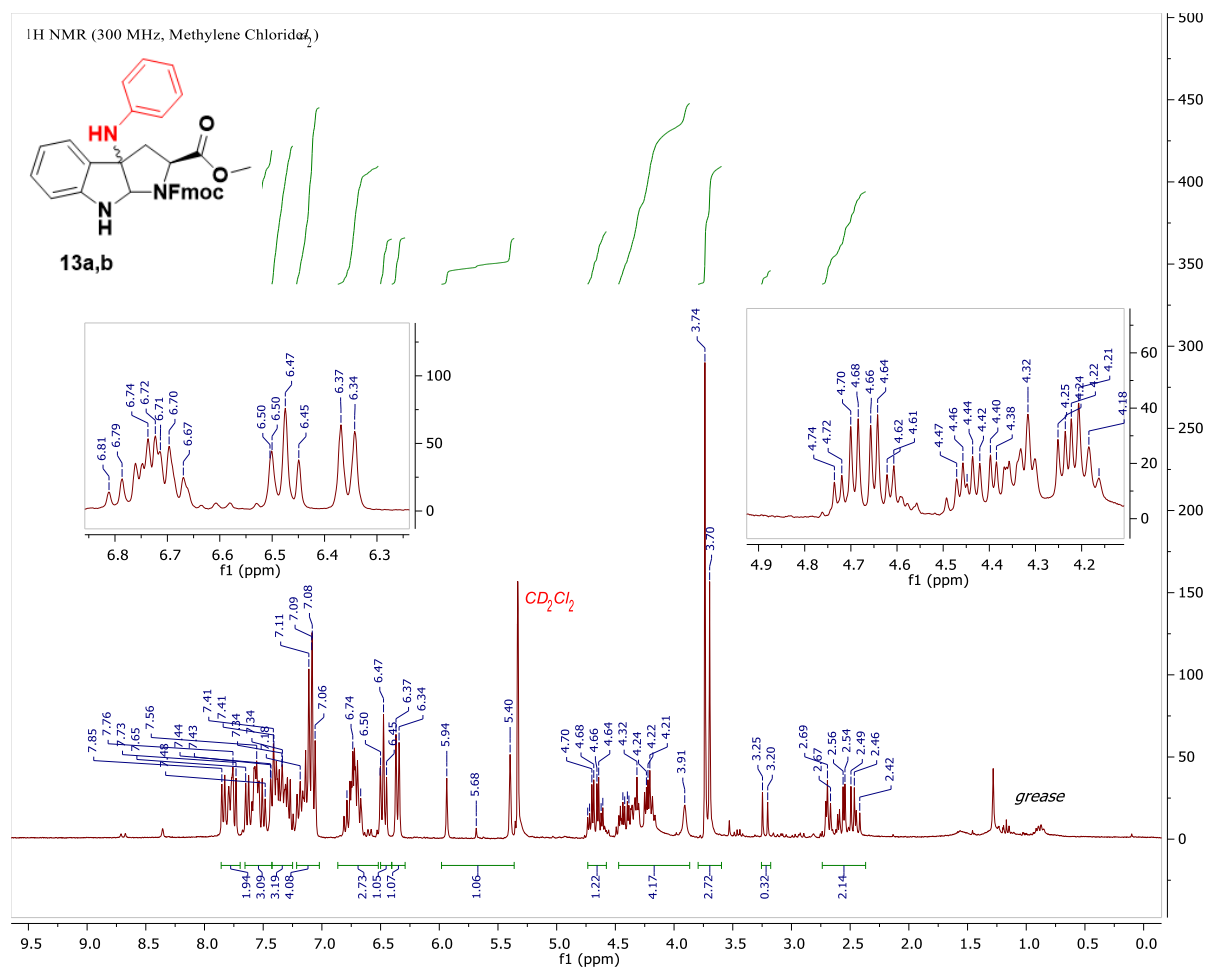

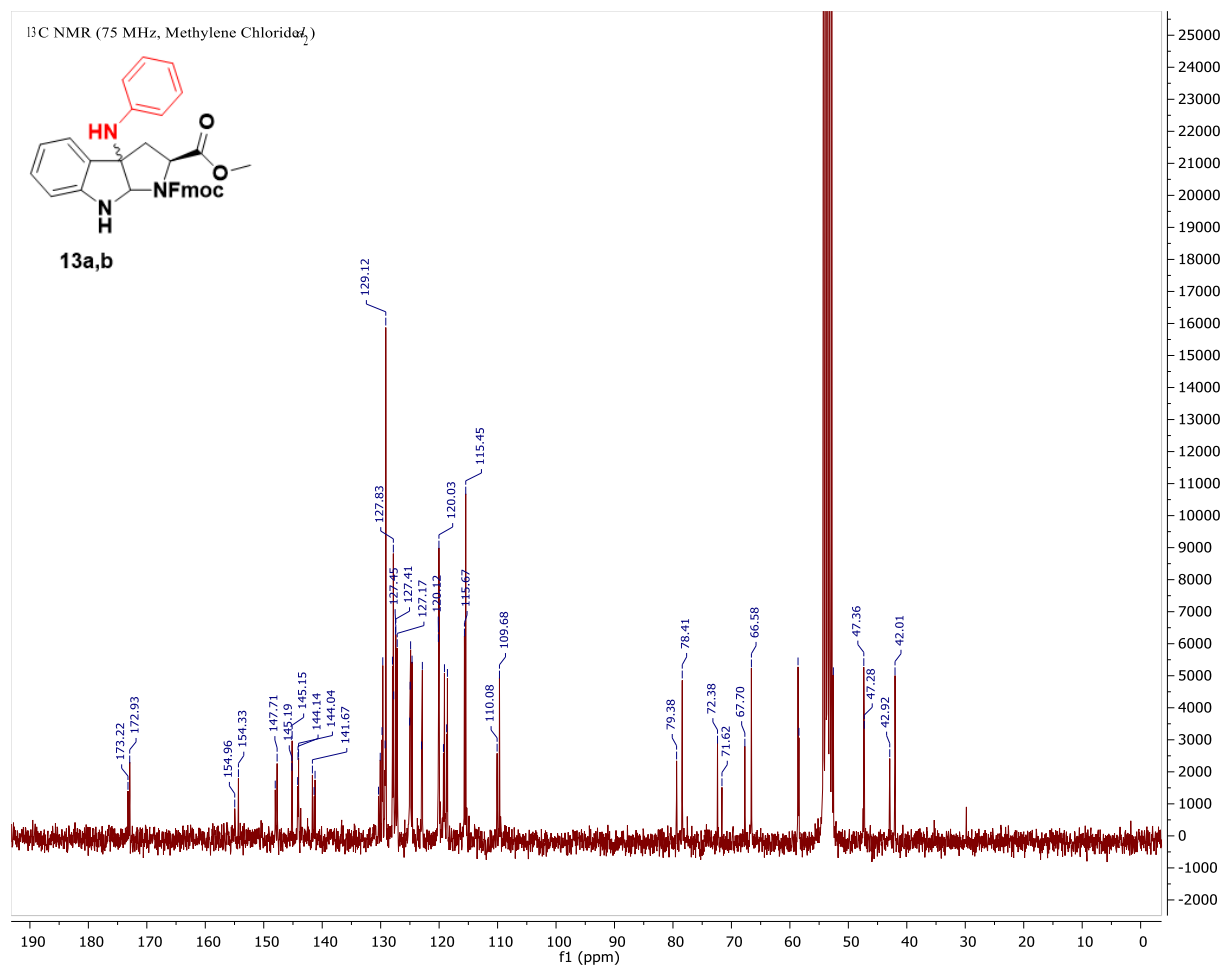



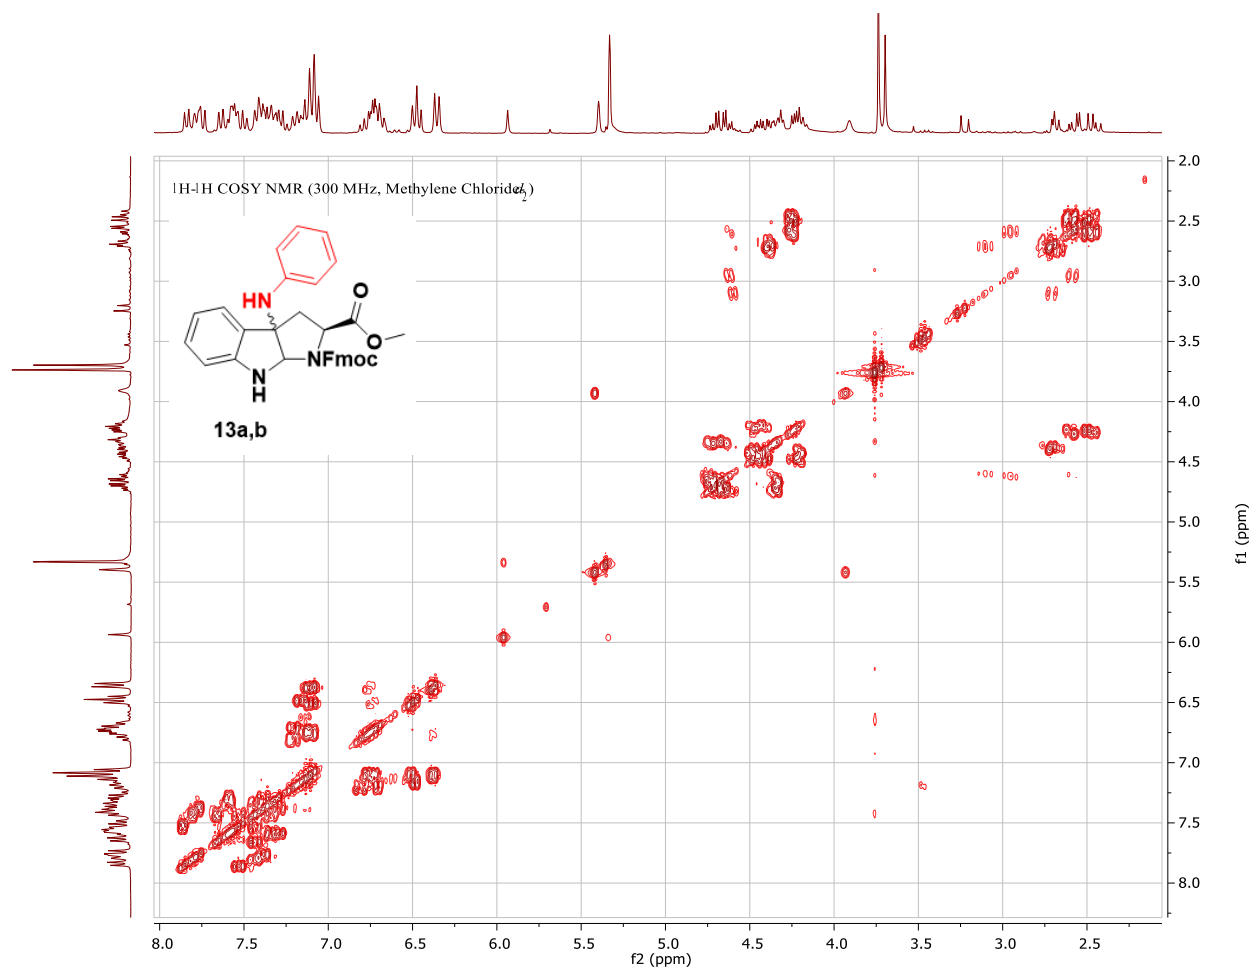

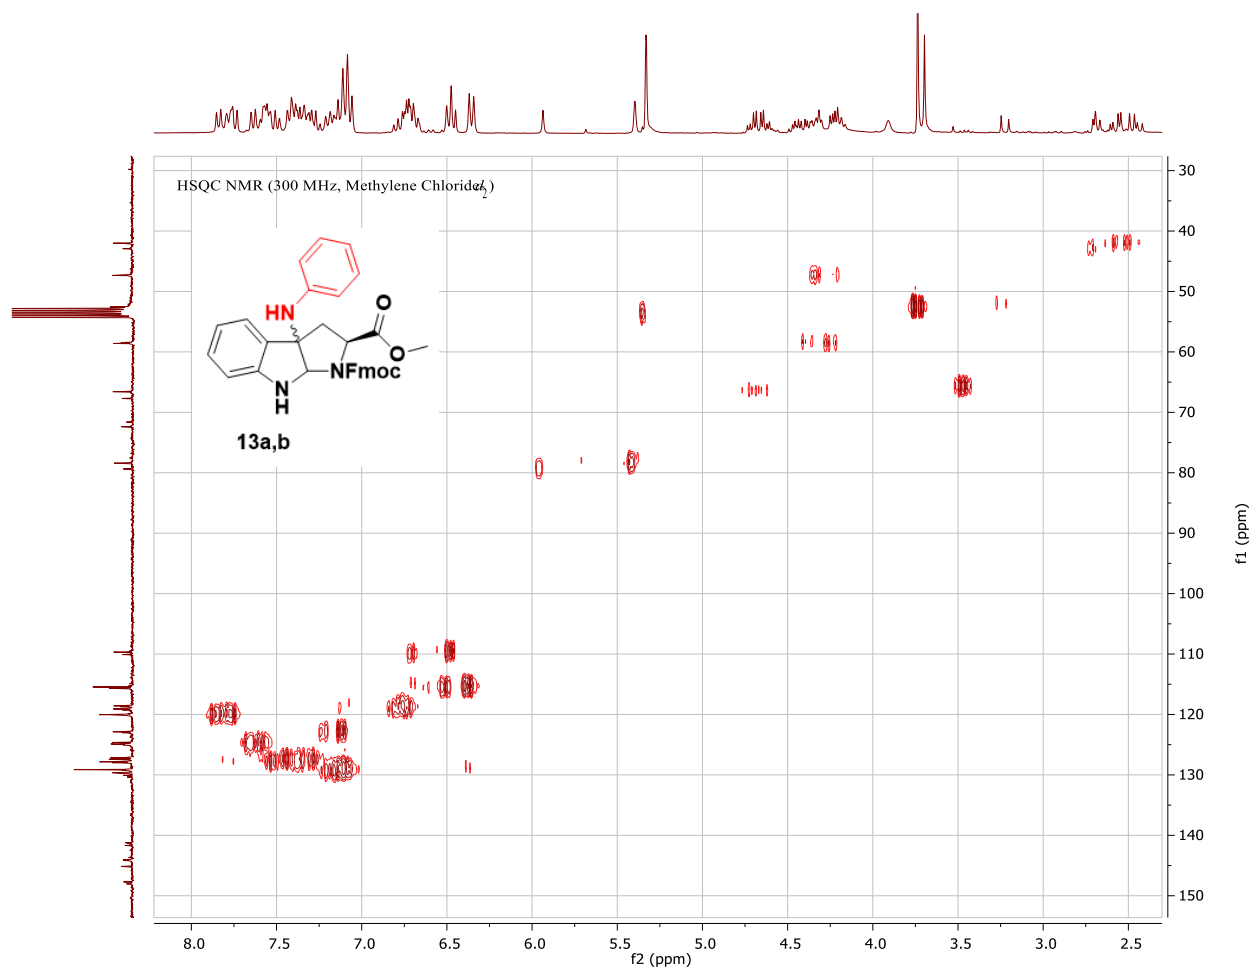

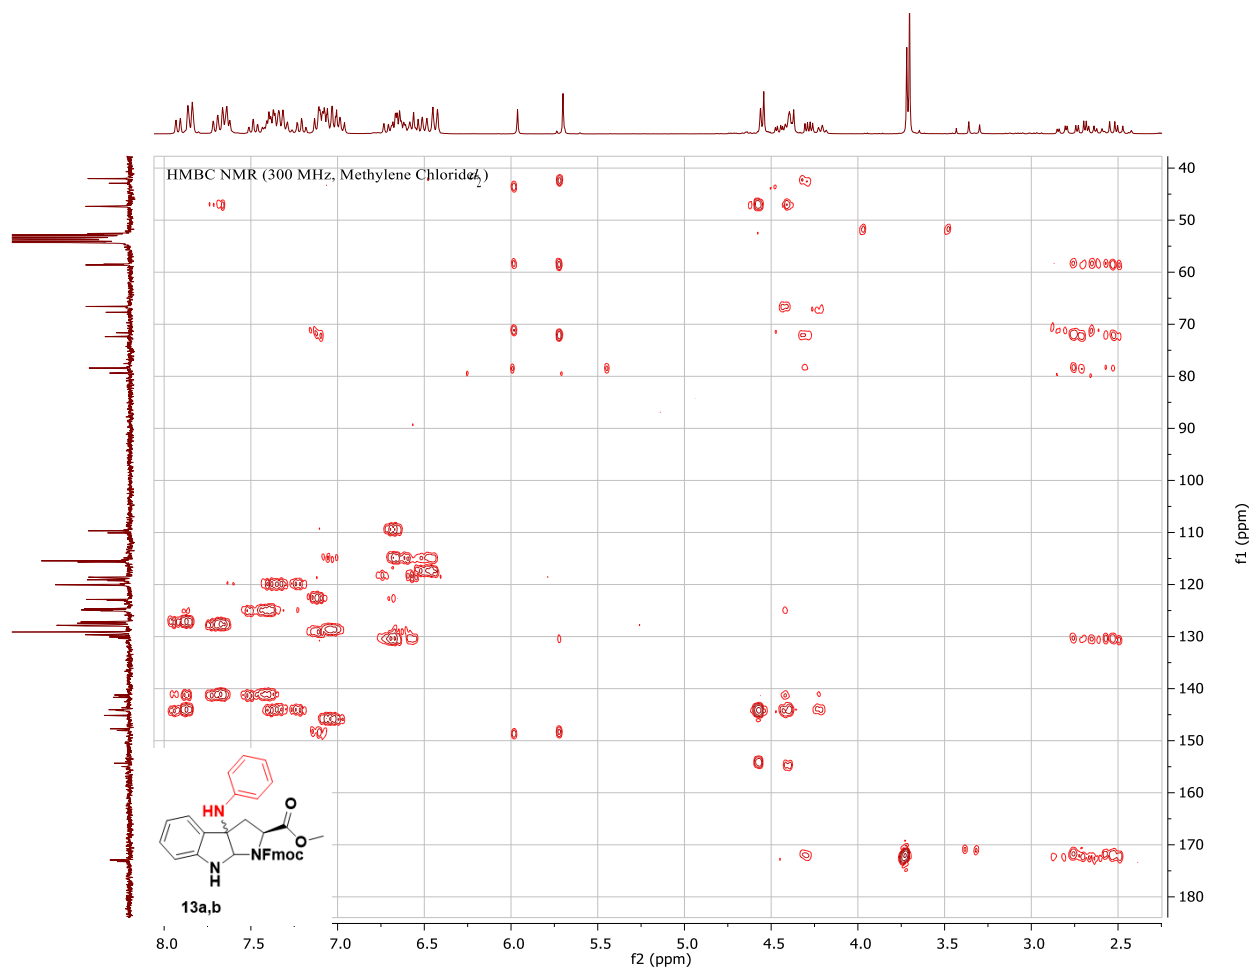

## Synthesis and characterization of compound **14a,b**

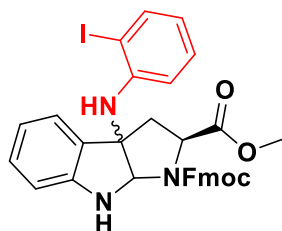

**14a,b** 63%<sup>c,e,f</sup>

Chemical Formula: C<sub>33</sub>H<sub>28</sub>IN<sub>3</sub>O<sub>4</sub>

Exact Mass: 657.11

Molecular Weight: 657.51

**1-((9H-fluoren-9-yl)methyl) 2-methyl (2S)-3a-((2-iodophenyl)amino)-3,3a,8,8a-tetrahydropyrrolo[2,3-b]indole-1,2(2H)-dicarboxylate (14a,b).** A flame-dried round bottom flask under positive Ar atmosphere was charged with N-Fmoc-FPI-OMe (**5a,b**, 1 equiv, 0.120 mg, 0.26 mmol) in 3.36 mL of anhydrous DCE followed by 2-iodoaniline (1.5 equiv, 86 mg, 0.39 mmol) and 0.84 mL of HFIP. The reaction contents were stirred at 50°C for 45 min. Upon completion, the crude (yellow, clear) was concentrated under reduced pressure and purified by silica gel flash column chromatography (gradient elution, 100% petroleum ether to 3:7 petroleum ether/diethyl ether) to afford 109 mg (0.166 mmol) of **14a,b** as a white solid in 63 % yield.

**<sup>1</sup>H NMR** (300 MHz, Acetone-*d*<sub>6</sub>) two diastereomers and rotamers, *syn-cis:anti-cis* (1:1) δ (ppm) 7.97 – 6.89 (m, 12H), 6.89 – 6.07 (m, 4H), 6.03 – 5.38 (m, 1H), 5.04 – 4.20 (m, 5H), 3.80, 3.78 (two s, 1.5H), 3.20, 3.28 (two s, 1.5H), 3.18 – 2.48 (m, 2H).

**<sup>13</sup>C NMR** (75 MHz, Acetone-*d*<sub>6</sub>) two diastereomers and rotamers, *syn-cis:anti-cis* (1:1) δ (ppm) 41.86, 42.33, 43.43, 43.48, 44.87, 47.16, 47.19, 47.31, 51.54, 51.75, 52.37, 52.74, 58.36, 58.48, 58.55, 66.87, 67.02, 67.49, 71.69, 71.76, 72.45, 72.54, 72.67, 72.74, 78.22, 78.56, 78.61, 78.87, 79.64, 86.61, 86.69, 87.25, 109.49, 109.53, 109.61, 109.69, 109.84, 109.89, 113.14, 113.27, 113.78, 113.90, 118.61, 118.67, 118.81, 118.86, 119.62, 119.97, 120.01, 120.08, 120.12, 120.16, 120.21, 122.49, 122.55, 123.36, 123.49, 125.06, 125.14, 125.24, 127.21, 127.25, 127.33, 127.43, 127.48, 127.83, 127.87, 128.01, 128.85, 128.89, 129.28, 129.61, 129.67, 130.02, 130.09, 139.46, 139.56, 139.61, 139.68, 141.28, 141.32, 141.38, 141.48, 141.59, 144.03, 144.08, 144.17, 144.28, 144.32, 144.45, 144.49, 144.54, 144.61, 144.80, 144.89, 148.35, 148.86, 150.19, 150.85, 153.84, 154.23, 154.56, 155.00, 170.81, 170.98, 171.85, 172.28.

**HRMS** (ESI-TOF, *m/z*): [M+Na]<sup>+</sup> calculated 680.1022; found 680.0993 for C<sub>33</sub>H<sub>28</sub>IN<sub>3</sub>O<sub>4</sub>Na.

**TLC** (hexane:ethyl acetate, 1:1 v/v): R<sub>f</sub> = 0.6 (UV, I<sub>2</sub>, potassium permanganate).

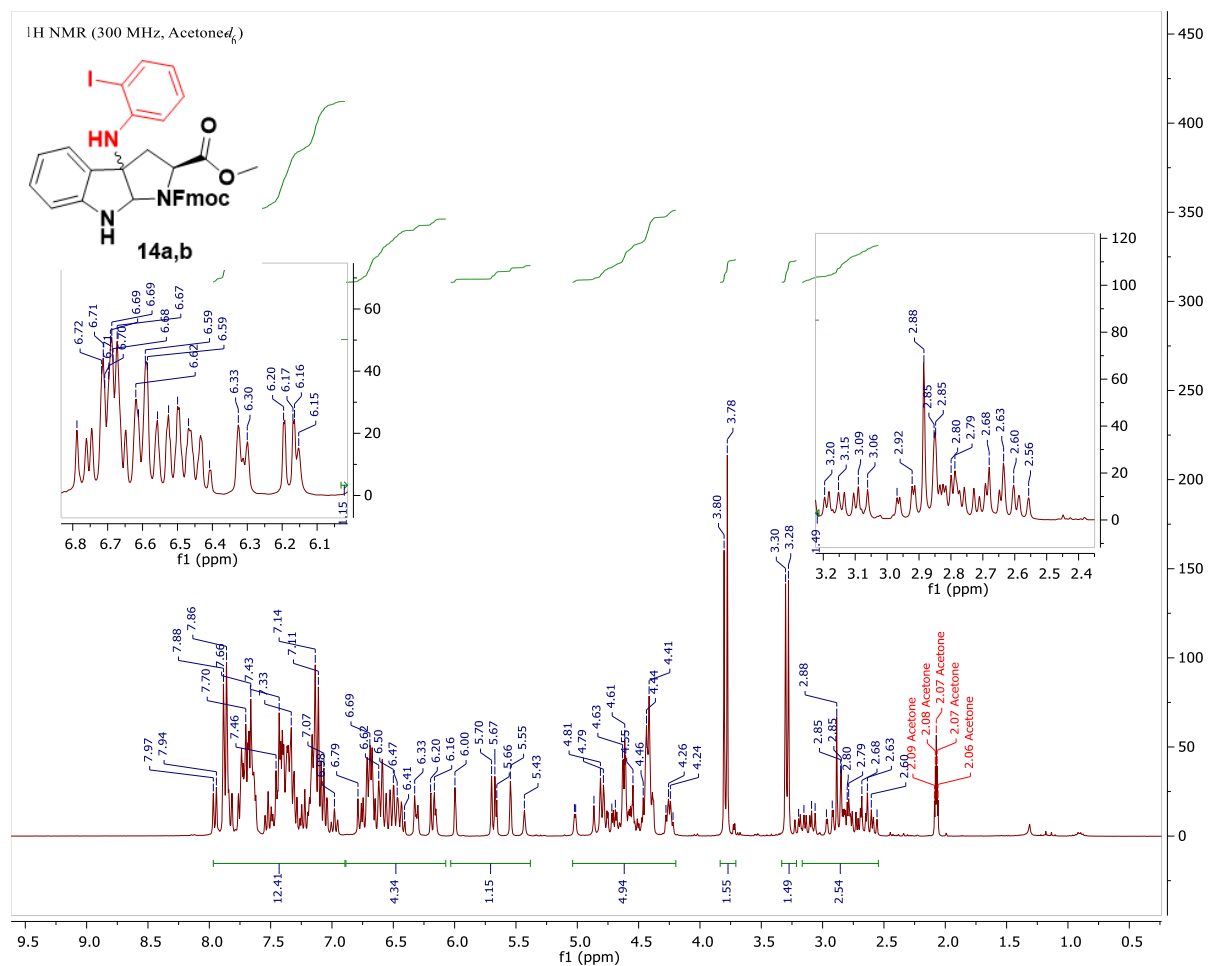

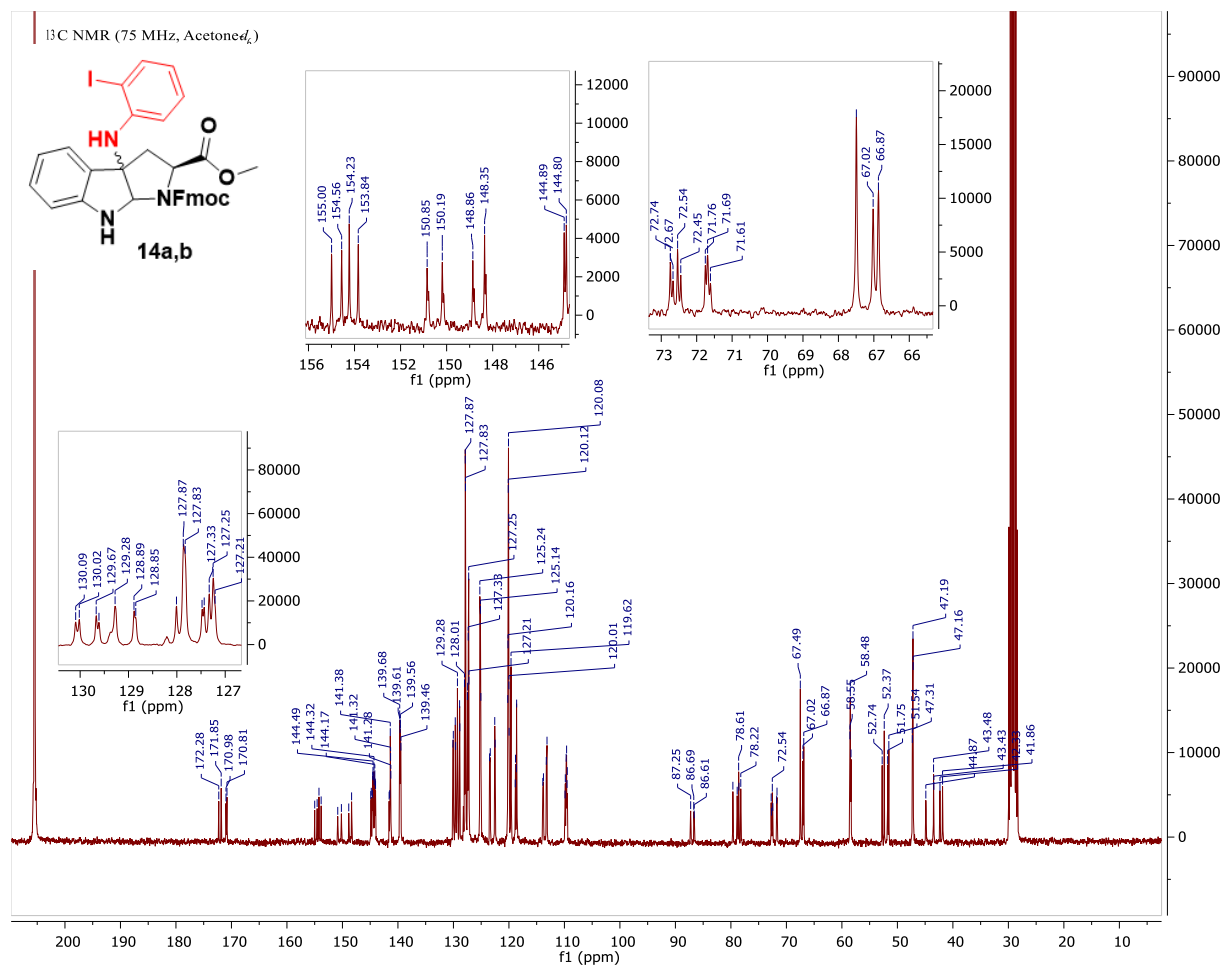

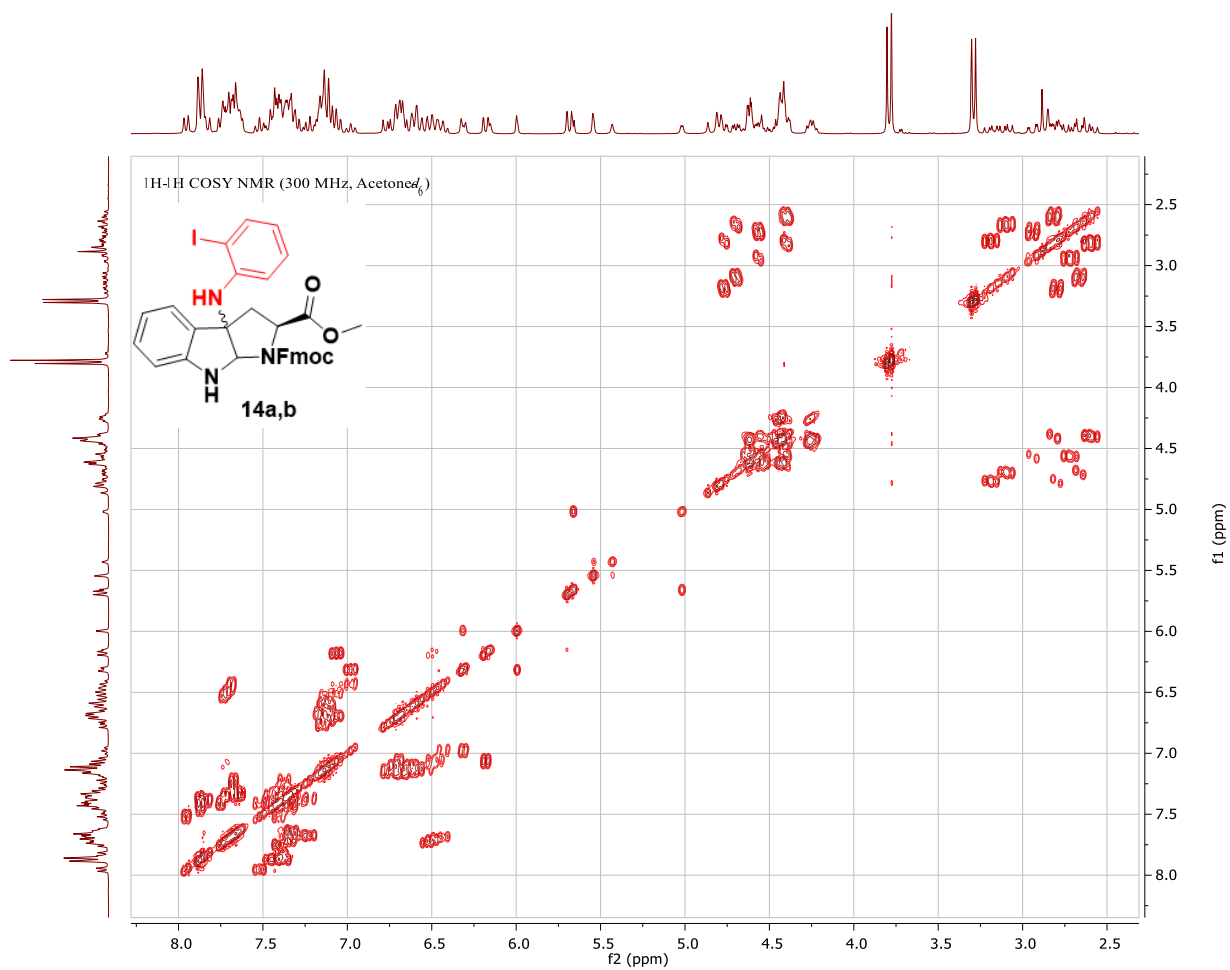

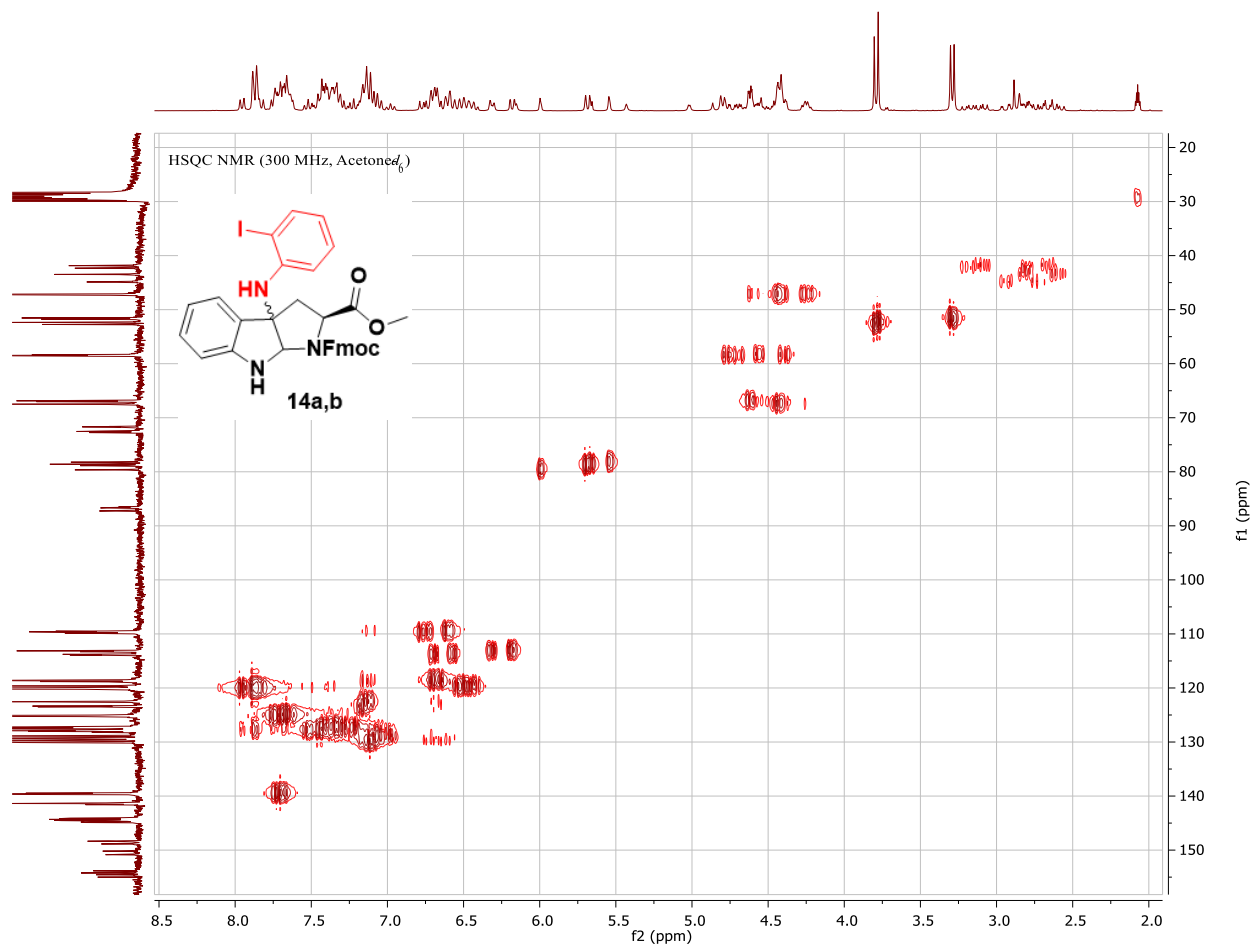



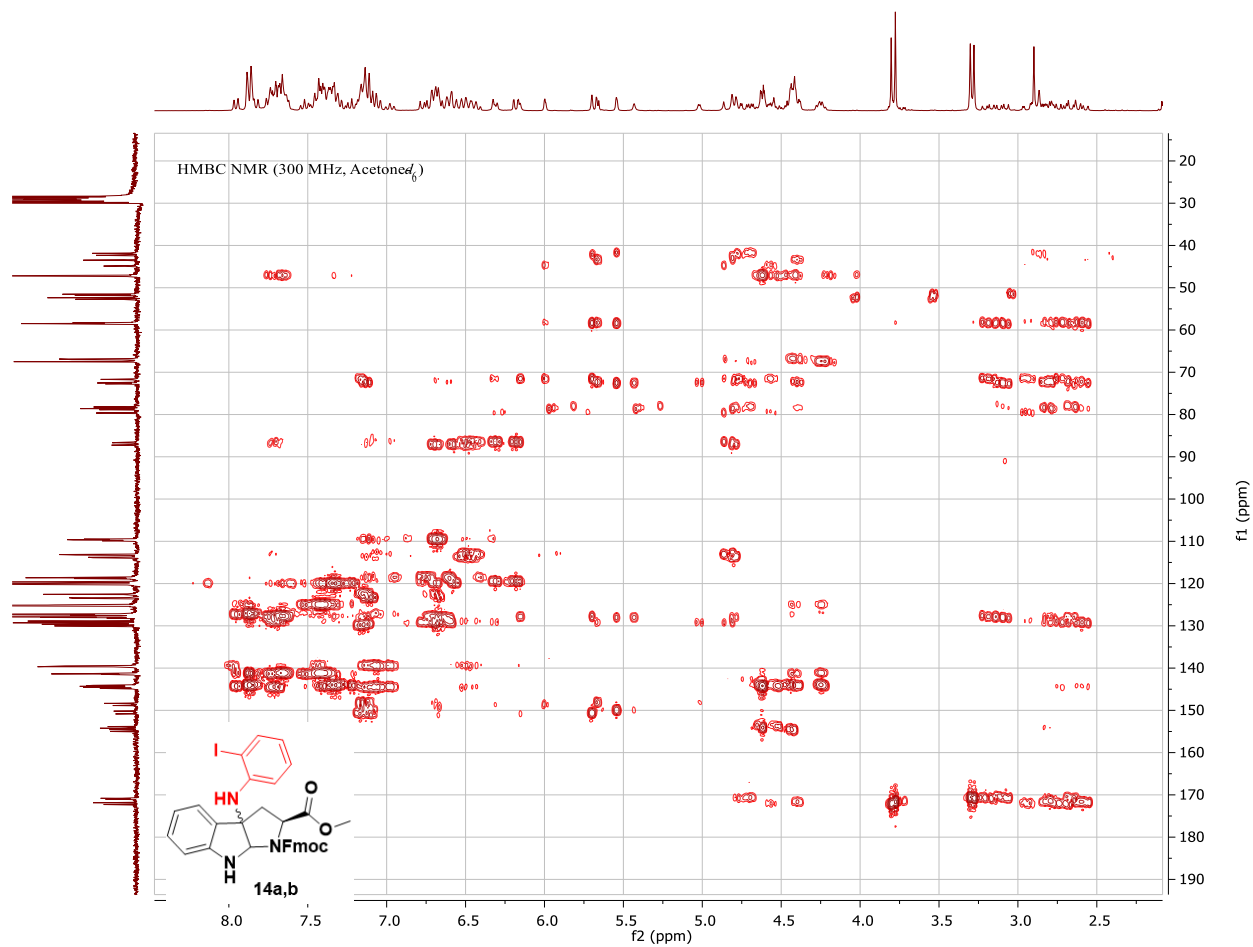

## Synthesis and characterization of compound **15a,b**

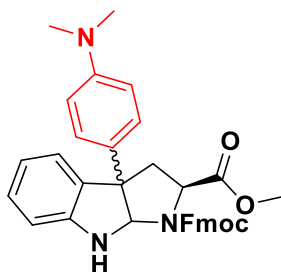

**15a,b** 79%<sup>c,e,f</sup>

Chemical Formula: C<sub>35</sub>H<sub>33</sub>N<sub>3</sub>O<sub>4</sub>

Exact Mass: 559.25

Molecular Weight: 559.67

**1-((9H-fluoren-9-yl)methyl) 2-methyl (2S)-3a-(4-(dimethylamino)phenyl)-3,3a,8,8a-tetrahydropyrrolo[2,3-b]indole-1,2(2H)-dicarboxylate (15a,b)** A flame-dried round bottom flask under positive Ar atmosphere was charged with N-Fmoc-FPI-OMe (**5a,b**, 1 equiv, 0.100 mg, 0.22 mmol) in 3.5 mL of anhydrous DCE followed by *N,N*-dimethylaniline (5 equiv, 132 mg, 138  $\mu$ L, 1.09 mmol) and 0.87 mL of HFIP. The reaction contents were stirred at 50°C for 1 h. Upon completion, the solvent was evaporated under reduced pressure and the crude was purified by silica gel flash column chromatography (gradient elution, 100% petroleum ether to 2:8 petroleum ether/diethyl ether) to afford 96 mg (0.17 mmol) of **15a,b** as a white solid in 79 % yield.

**<sup>1</sup>H NMR** (300 MHz, Acetone-*d*<sub>6</sub>) two diastereomers and rotamers, *syn-cis:anti-cis* (1:1.1)  $\delta$  (ppm) 8.03 – 7.68 (m, 3H), 7.66 – 6.91 (m, 9H), 6.86 – 6.39 (m, 4H), 6.02, 5.8, 5.6, 5.48, 5.23, 5.17, 4.93 (s, 1H), 4.82 – 3.90 (m, 4H), 3.66 (s, 1.4H), 3.16, 3.11 (two s, 1.6H), 3.03-2.94 (m, 1H), 2.89 (s, 3H), 2.88 (s, 3H), 2.86 – 2.54 (m, 1H).

**<sup>13</sup>C NMR** (75 MHz, Acetone-*d*<sub>6</sub>) two diastereomers and rotamers, *syn-cis:anti-cis* (1:1.1)  $\delta$  (ppm) 28.32, 28.58, 28.84, 29.09, 29.35, 29.61, 29.86, 39.79, 39.81, 39.86, 40.00, 40.54, 40.62, 41.25, 47.16, 47.24, 47.29, 47.48, 51.21, 51.45, 51.59, 51.94, 58.81, 59.58, 59.75, 59.84, 60.14, 66.37, 66.49, 67.20, 67.29, 83.41, 83.49, 83.57, 83.64, 84.14, 84.22, 84.50, 84.59, 109.40, 109.67, 109.72, 110.26, 112.50, 112.58, 112.61, 118.17, 118.80, 118.94, 120.03, 120.06, 120.17, 120.22, 120.27, 120.39, 123.97, 124.26, 124.30, 124.87, 124.99, 125.11, 125.21, 125.28, 126.34, 126.51, 127.15, 127.19, 127.22, 127.33, 127.34, 127.47, 127.50, 127.79, 127.83, 128.00, 128.41, 128.44, 130.35, 130.65, 131.35, 131.42, 131.97, 132.22, 132.35, 133.12, 141.34, 141.47, 141.54, 141.63, 143.72, 144.19, 144.29, 144.36, 144.47, 148.43, 148.93, 149.84, 149.88, 149.98, 150.38, 150.44, 153.55, 153.61, 154.10, 154.35, 171.14, 171.26, 171.95, 172.69, 205.37.

**HRMS** (ESI-TOF, *m/z*): [M+H]<sup>+</sup> calculated 560.2549; found 560.2553 for C<sub>35</sub>H<sub>35</sub>N<sub>3</sub>O<sub>4</sub>.

**TLC** (petroleum ether:diethyl ether, 1:1 v/v): R<sub>f</sub> = 0.3 (UV, I<sub>2</sub>, potassium permanganate).

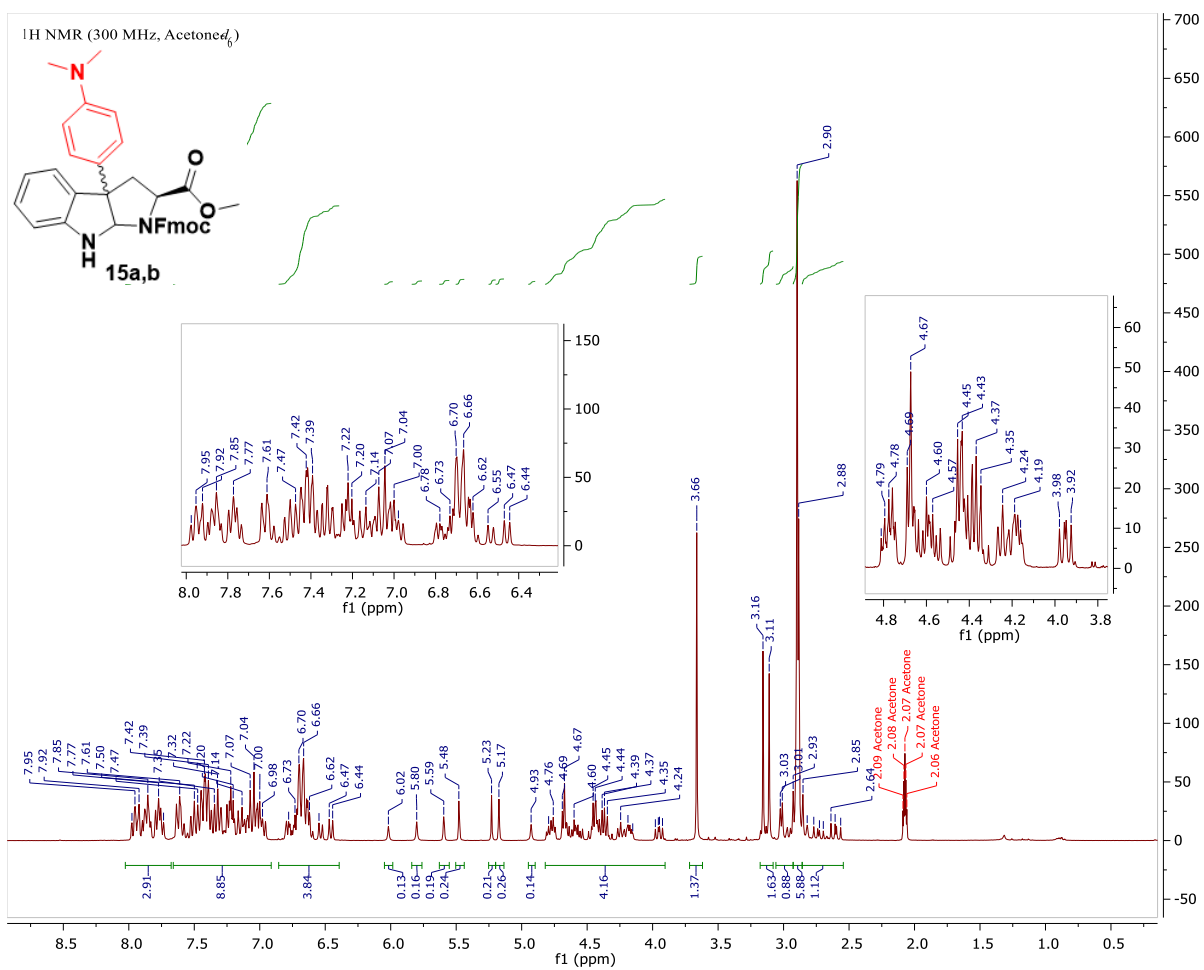

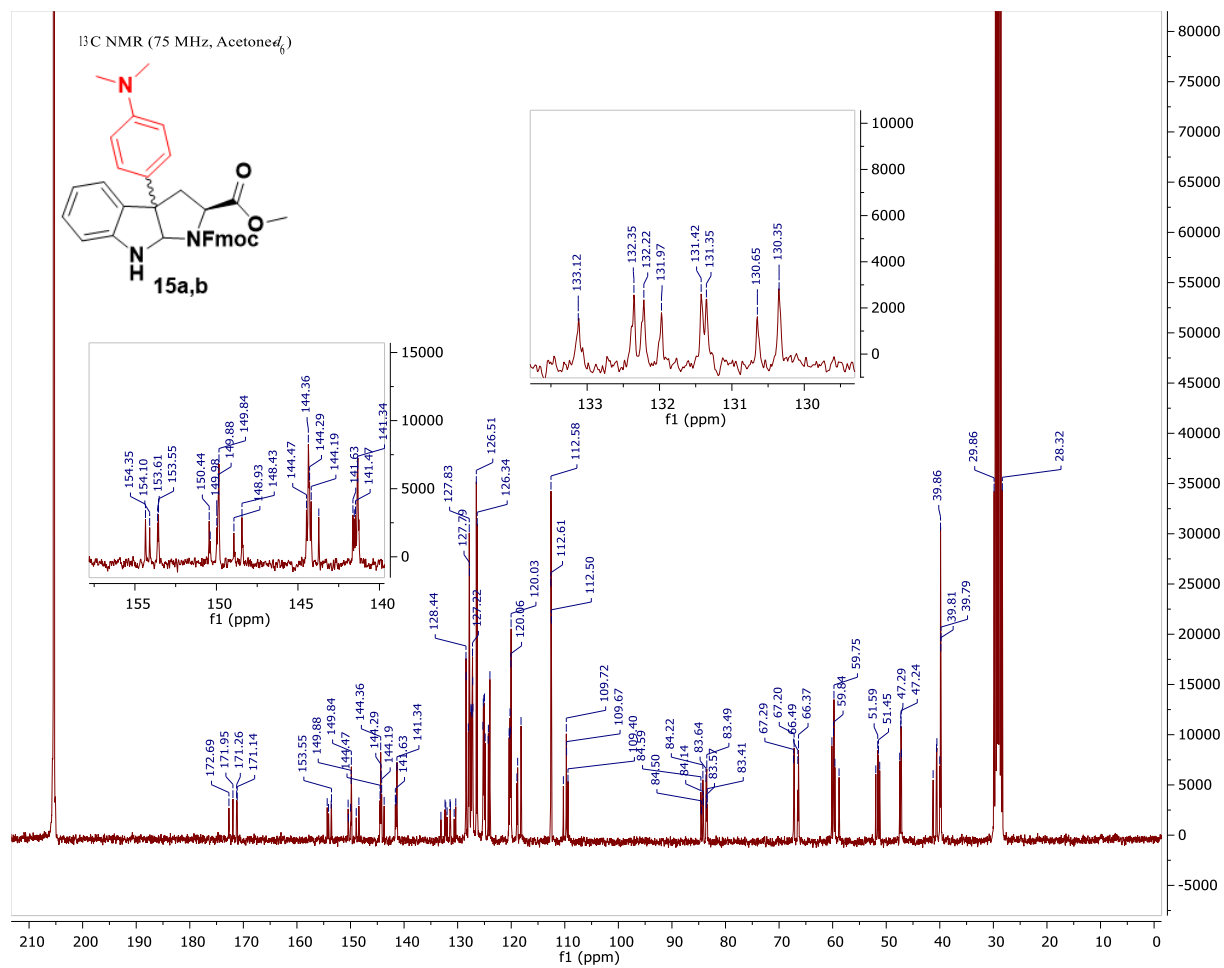

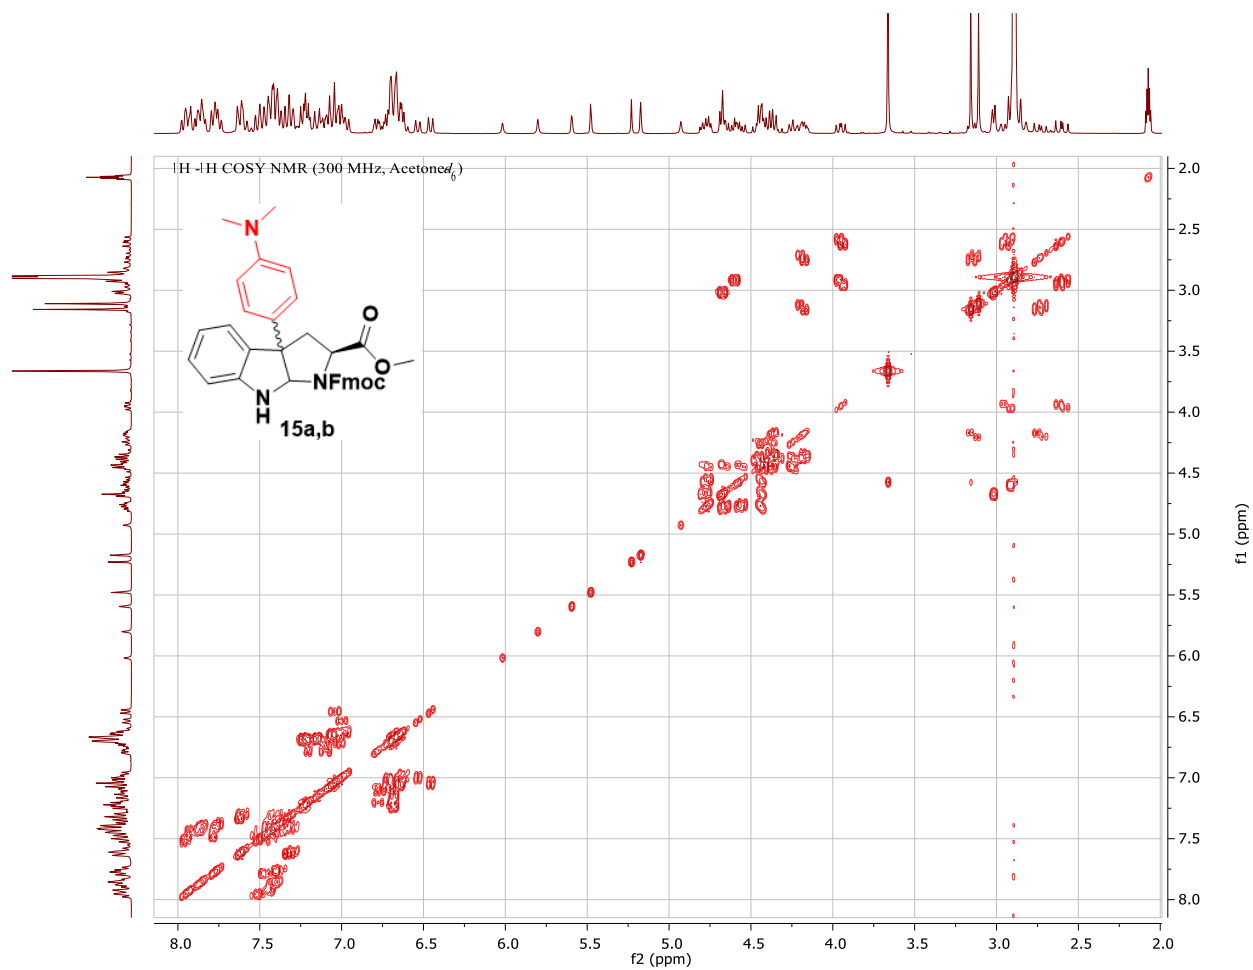

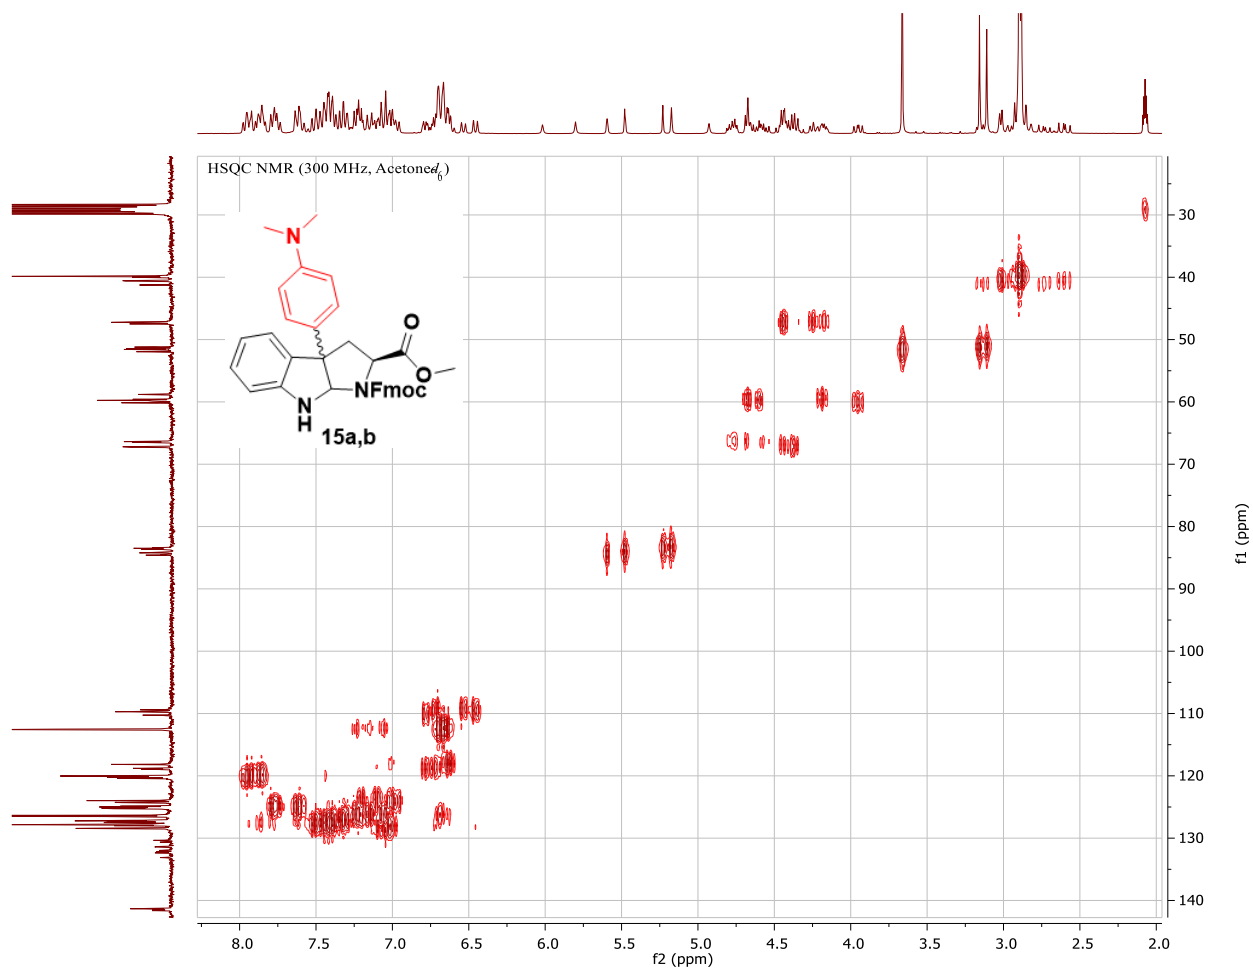

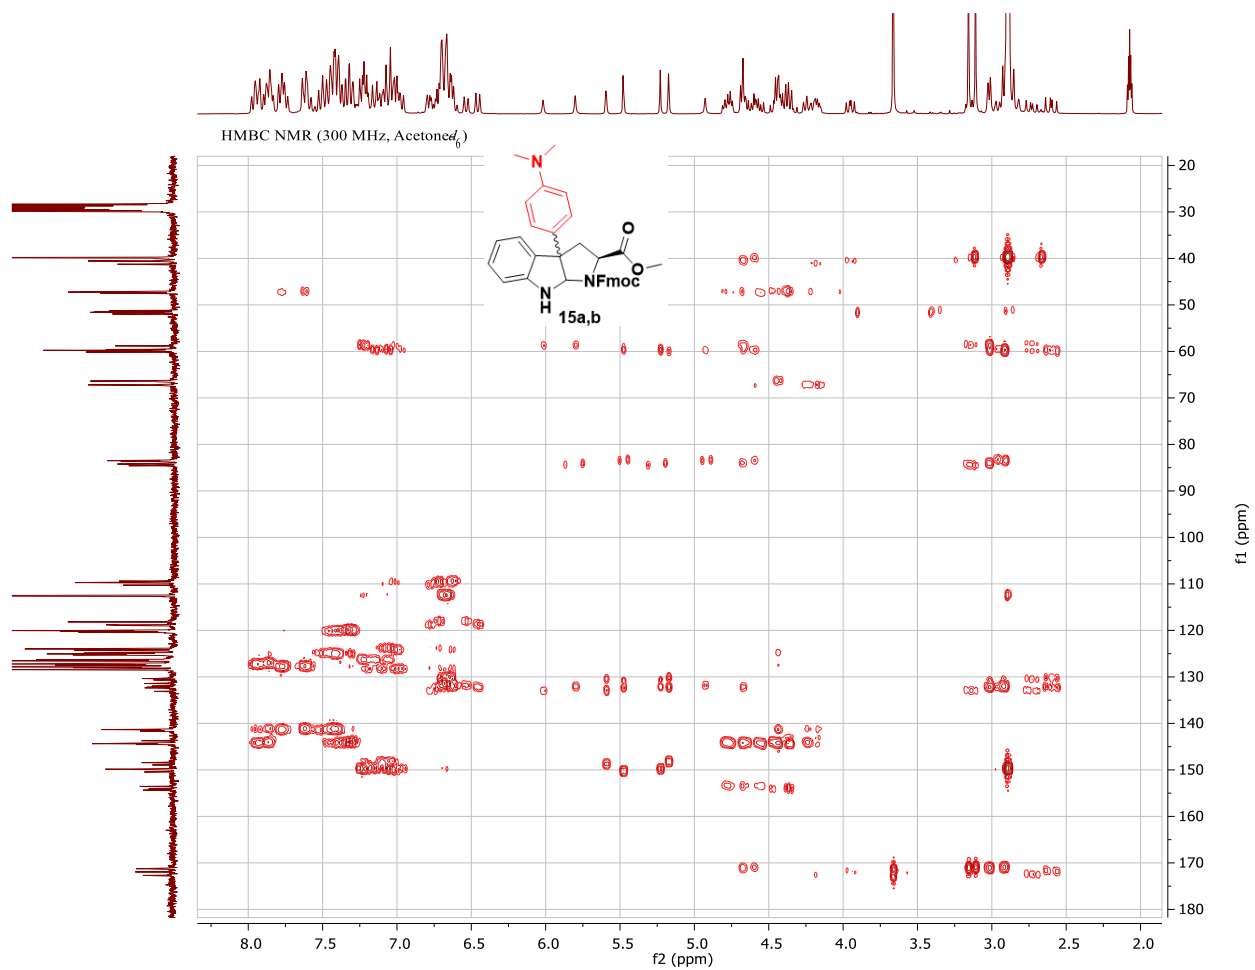

## Synthesis and characterization of compound **16a,b**

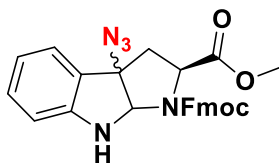

**16a,b** 84%<sup>b,f</sup>

Chemical Formula: C<sub>27</sub>H<sub>23</sub>N<sub>5</sub>O<sub>4</sub>

Exact Mass: 481.18

Molecular Weight: 481.51

**1-((9H-fluoren-9-yl)methyl) 2-methyl (2S)-3a-azido-3,3a,8,8a-tetrahydropyrrolo[2,3-b]indole-1,2(2H)-dicarboxylate (16a,b)** A flame-dried round bottom flask under positive Ar atmosphere was charged with N-Fmoc-FPI-OMe (**5a,b**, 1 equiv, 43 mg, 94  $\mu$ mol) in 0.75 mL of anhydrous DCM followed by azidotrimethylsilane (3.3 equiv, 35.7 mg, 40.7  $\mu$ L, 0.031 mmol) and 0.19 mL of HFIP. The reaction contents were stirred at 21 °C for 2 h. Upon completion, the crude (beige and clear) was concentrated under reduced pressure and purified by silica gel flash column chromatography (isocratic elution, 2:3 petroleum ether/diethyl ether) to afford 38 mg (79  $\mu$ mol) of **16a,b** as a white solid in 84 % yield. Note: product has the same R<sub>f</sub> as the starting material (diethyl ether:petroleum ether, 6:4 v/v).

**<sup>1</sup>H NMR**(300 MHz, Methylene Chloride-*d*<sub>2</sub>) two diastereomers and rotamers, *syn-cis:anti-cis* (1.5:1)  $\delta$  (ppm) 7.98 – 7.83 (m, 1H), 7.82 – 7.72 (m, 1H), 7.72 – 7.62 (m, 1H), 7.60 – 7.34 (m, 4H), 7.34 – 7.09 (m, 3H), 6.95 – 6.69 (m, 1H), 6.53 (d, *J* = 7.9 Hz, 0H), 6.41 (d, *J* = 7.9 Hz, 0H), 5.56 (s, 0H), 5.37 (s, 0H), 4.95 – 4.78 (m, 1H), 4.72 (dd, *J* = 10.7, 3.9 Hz, 0H), 4.63 (dd, *J* = 10.7, 4.8 Hz, 0H), 4.55 – 4.30 (m, 2H), 4.29 – 4.03 (m, 1H), 3.70, 3.67 (two s, 1.7H), 3.15, 3.14 (two s, 1.1H), 2.86 – 2.23 (m, 2H).

**<sup>13</sup>C NMR** (75 MHz, Methylene Chloride-*d*<sub>2</sub>) two diastereomers and rotamers, *syn-cis:anti-cis* (1.5:1)  $\delta$  (ppm) 38.91, 39.65, 39.72, 40.51, 47.64, 47.67, 47.81, 47.98, 52.54, 52.67, 52.91, 53.09, 59.62, 59.85, 66.85, 67.11, 68.16, 75.46, 75.91, 76.20, 76.56, 81.15, 81.81, 81.86, 82.98, 110.45, 110.67, 110.84, 111.24, 119.51, 119.73, 120.10, 120.47, 120.68, 120.72, 120.81, 123.98, 124.17, 124.24, 124.66, 124.73, 124.95, 125.10, 125.17, 125.36, 125.43, 127.56, 127.62, 127.83, 127.94, 128.10, 128.25, 128.44, 128.54, 131.42, 131.56, 131.82, 131.94, 141.71, 141.78, 141.81, 142.18, 144.02, 144.39, 144.43, 144.51, 149.05, 149.56, 150.74, 151.28, 153.96, 154.12, 154.86, 154.96, 170.93, 171.06, 171.76, 172.21.

**HRMS** (ESI-TOF, *m/z*): [M+Na]<sup>+</sup> calculated 504.1648; found 504.1656 for C<sub>27</sub>H<sub>23</sub>N<sub>5</sub>O<sub>4</sub>Na

**TLC** (diethyl ether:petroleum ether, 6:4 v/v): R<sub>f</sub> = 0.7 (UV, I<sub>2</sub>, p-anisaldehyde).

**FT-IR**  $\nu$  (cm<sup>-1</sup>): 2101 (strong, N=N=N).



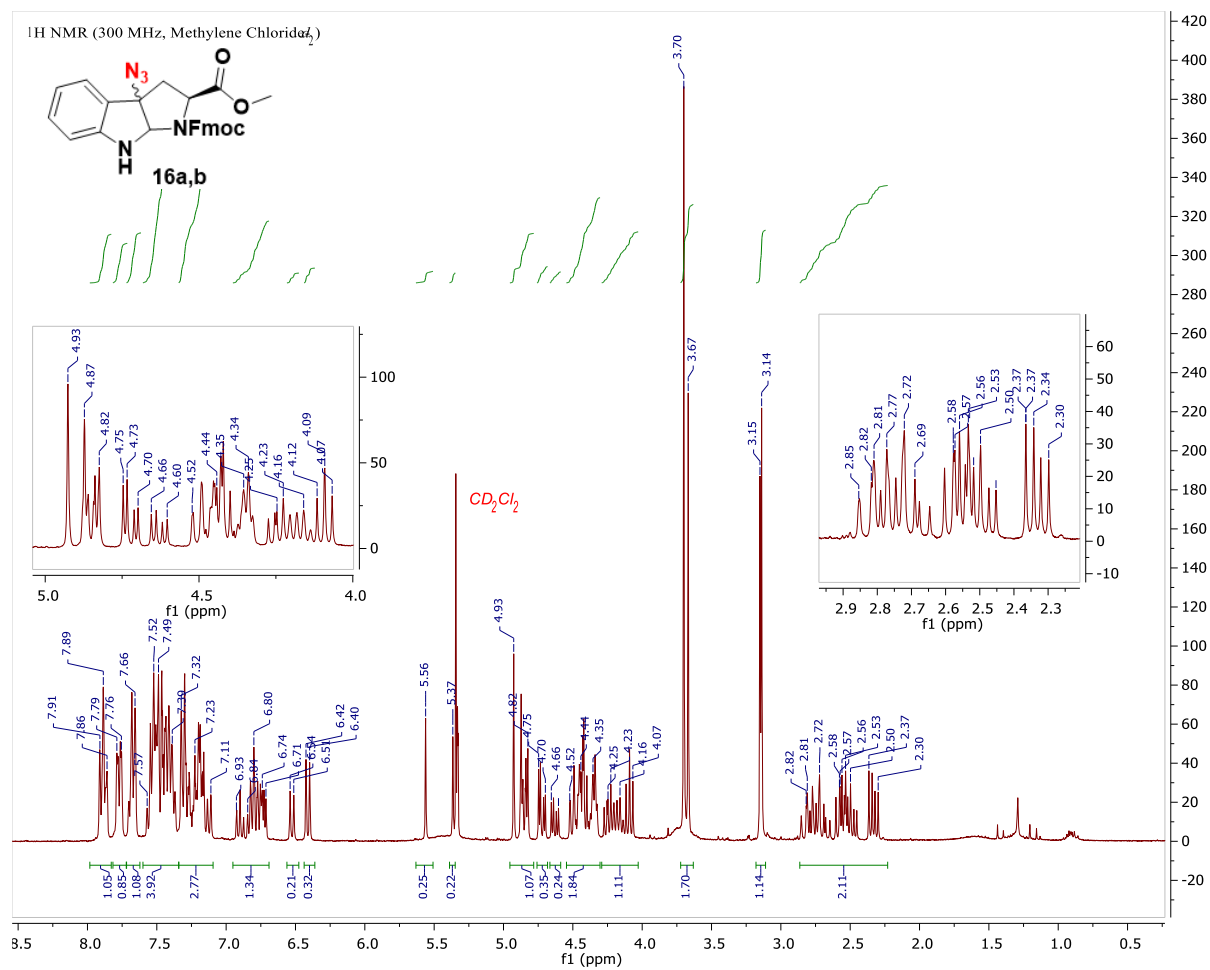

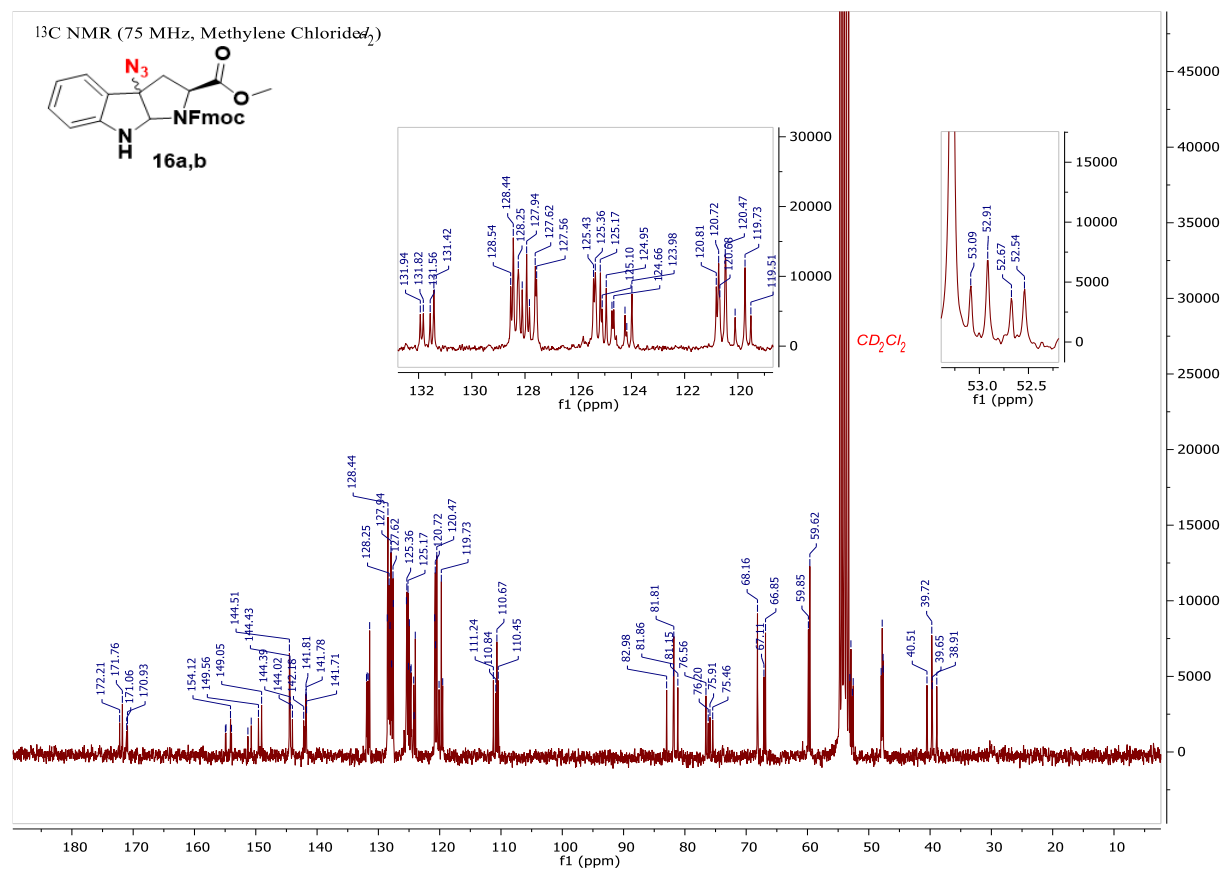

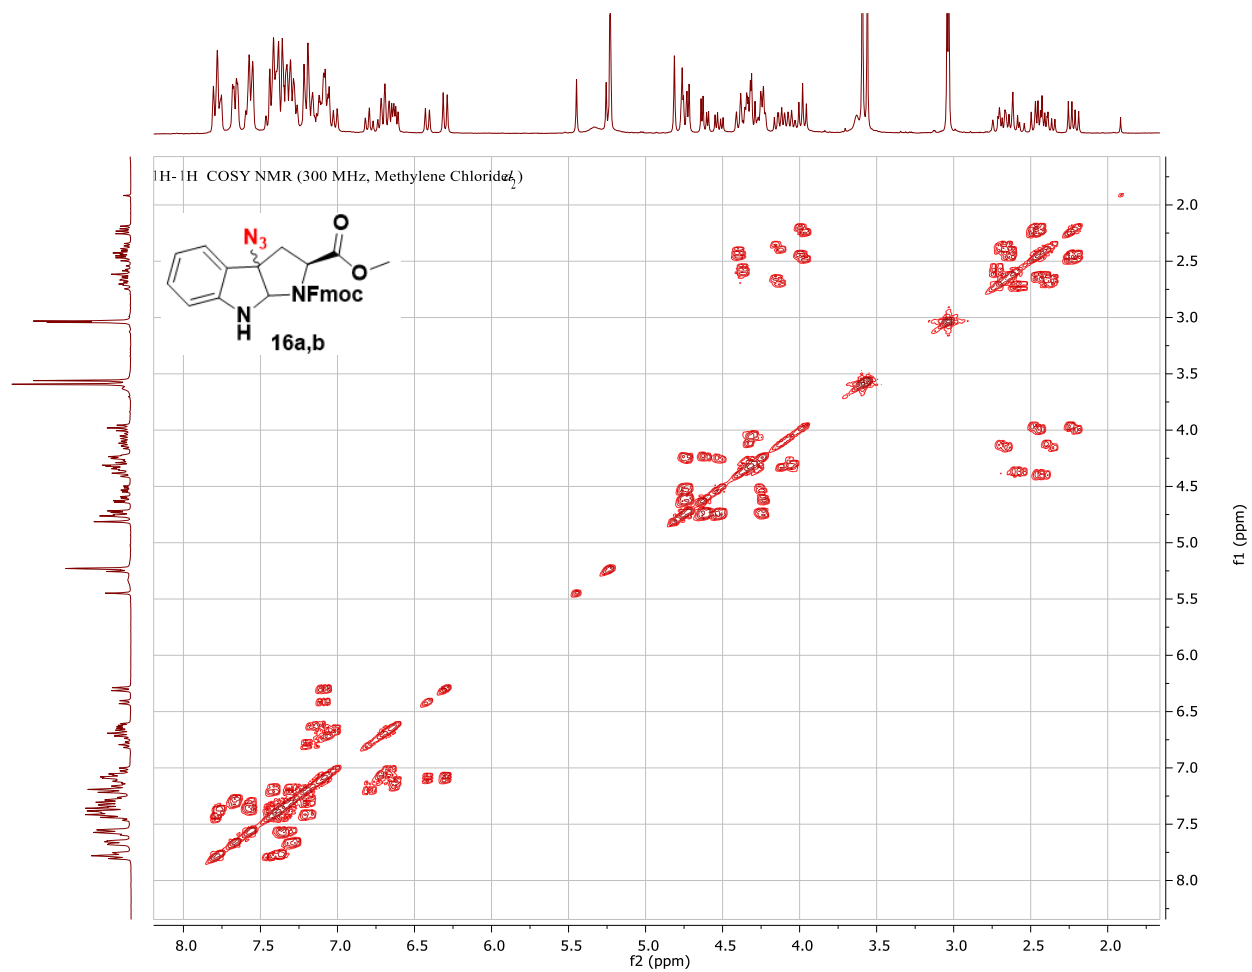

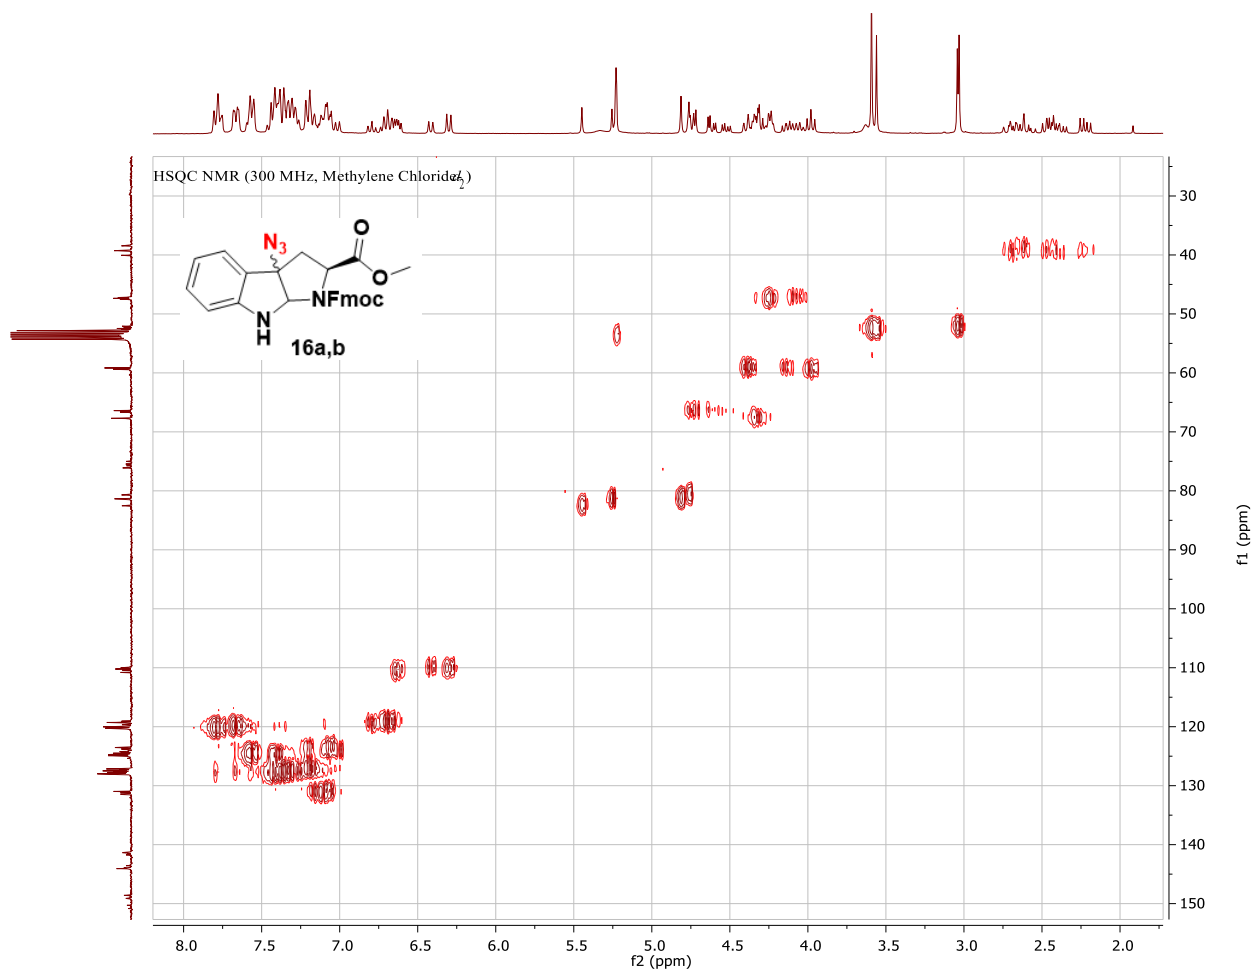

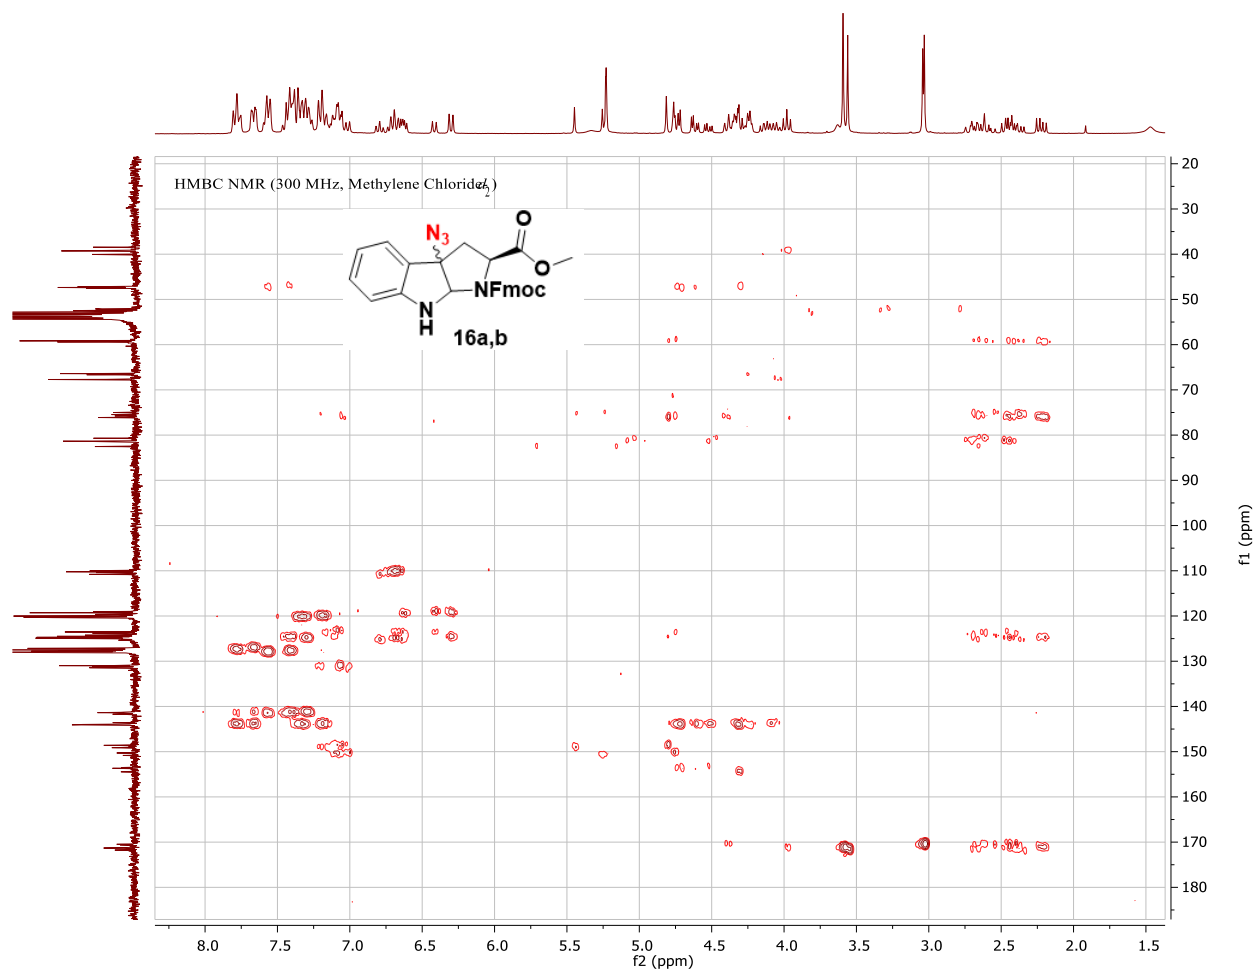

## Synthesis and characterization of compound **17a,b**

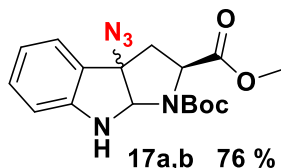

**Chemical Formula:** C<sub>17</sub>H<sub>21</sub>N<sub>5</sub>O<sub>4</sub>

**Exact Mass:** 359.1594

**Molecular Weight:** 359.3860

**1-((9H-fluoren-9-yl)methyl) 2-methyl (2S)-3a-azido-3,3a,8,8a-tetrahydropyrrolo[2,3-b]indole-1,2(2H)-dicarboxylate (**17a,b**)** A flame-dried round bottom flask under positive Ar atmosphere was charged with N-Boc-FPI-OMe (**6a,b**, 1 equiv, 100 mg, 0.30 mmol) in 4.1 mL of anhydrous DCM followed by azidotrimethylsilane (3 equiv, 103 mg, 117  $\mu$ L, 0.89 mmol) and 1.8 mL of HFIP. The reaction contents were stirred at 21 °C for 2 h. Upon completion, the crude (beige and clear) was concentrated under reduced pressure and purified by silica gel flash column chromatography (isocratic elution, 9:1 hexane/ethyl acetate) to afford 82 mg (0.23 mmol) of **17a,b** as a beige solid in 76 % yield.

**<sup>1</sup>H NMR**(400 MHz, Acetone-*d*<sub>6</sub>) major diastereomer and rotamers, *syn-cis*  $\delta$  (ppm) 7.44 – 7.32 (m, 1H), 7.28 – 7.16 (m, 1H), 6.88 – 6.70 (m, 2H), 6.16 (br s, 1H), 5.51, 5.43 (two d, *J* = 1.7 Hz, 1H), 4.20 – 4.10 (m, 1H), 3.76, 3.70 (two s, 3H), 2.90 – 2.73 (m, 1H), 2.42 – 2.33 (m, 1H), 1.51, 1.37 (two s, 9H).

**<sup>13</sup>C NMR** (101 MHz, Acetone-*d*<sub>6</sub>) major diastereomer and major rotamer, *syn-cis*  $\delta$  (ppm) 27.50, 39.35, 51.84, 59.45, 75.42, 80.52, 81.92, 110.62, 118.93, 123.88, 125.30, 131.03, 150.09, 153.39, 172.13.

**HRMS** (ESI-TOF, *m/z*): [M+Na]<sup>+</sup> calculated 359.1594; found 359.1597 for C<sub>17</sub>H<sub>21</sub>N<sub>5</sub>O<sub>4</sub>Na

**TLC** (ethyl acetate:hexane, 1:4 v/v): R<sub>f</sub> = 0.7 (UV, I<sub>2</sub>, p-anisaldehyde).

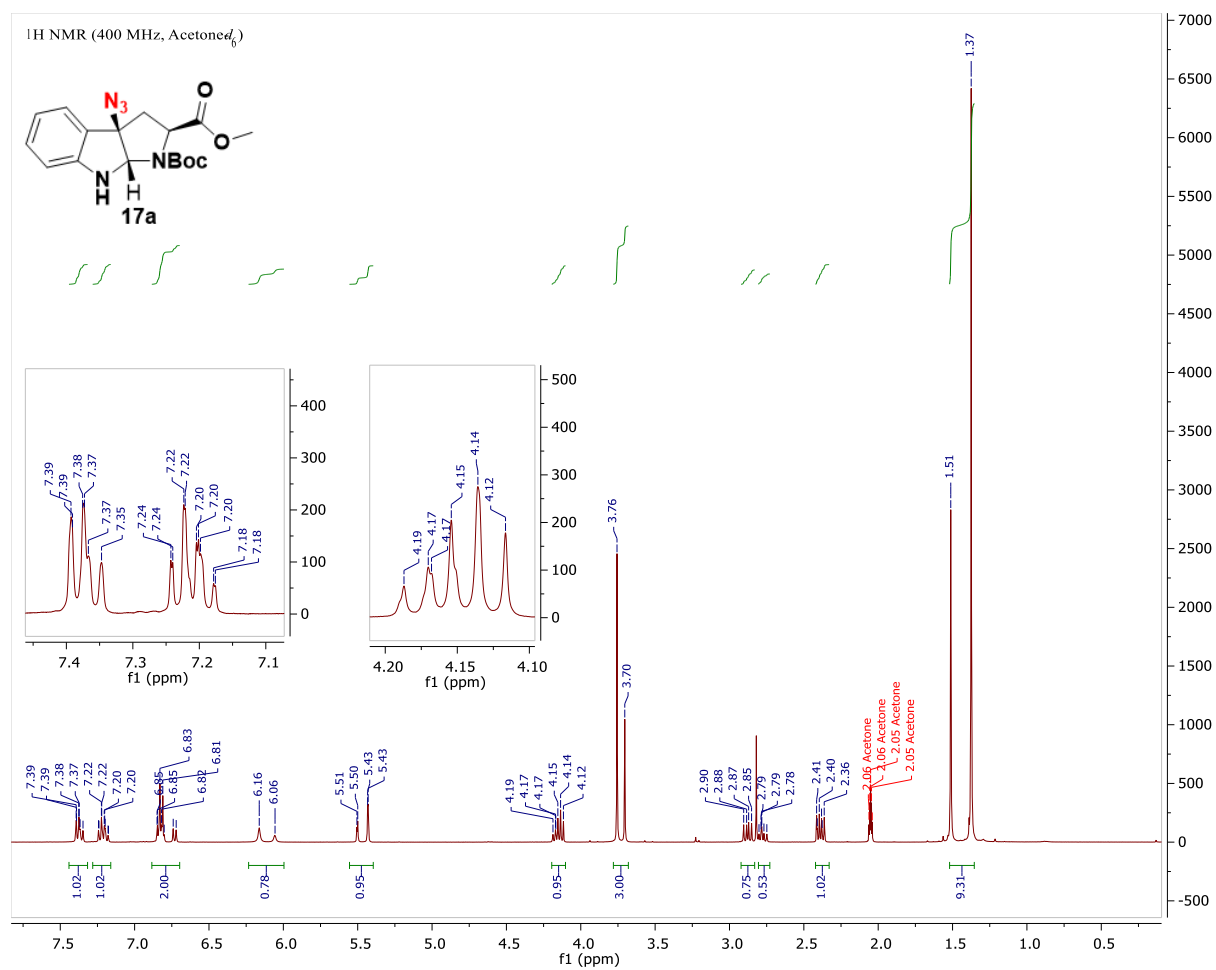

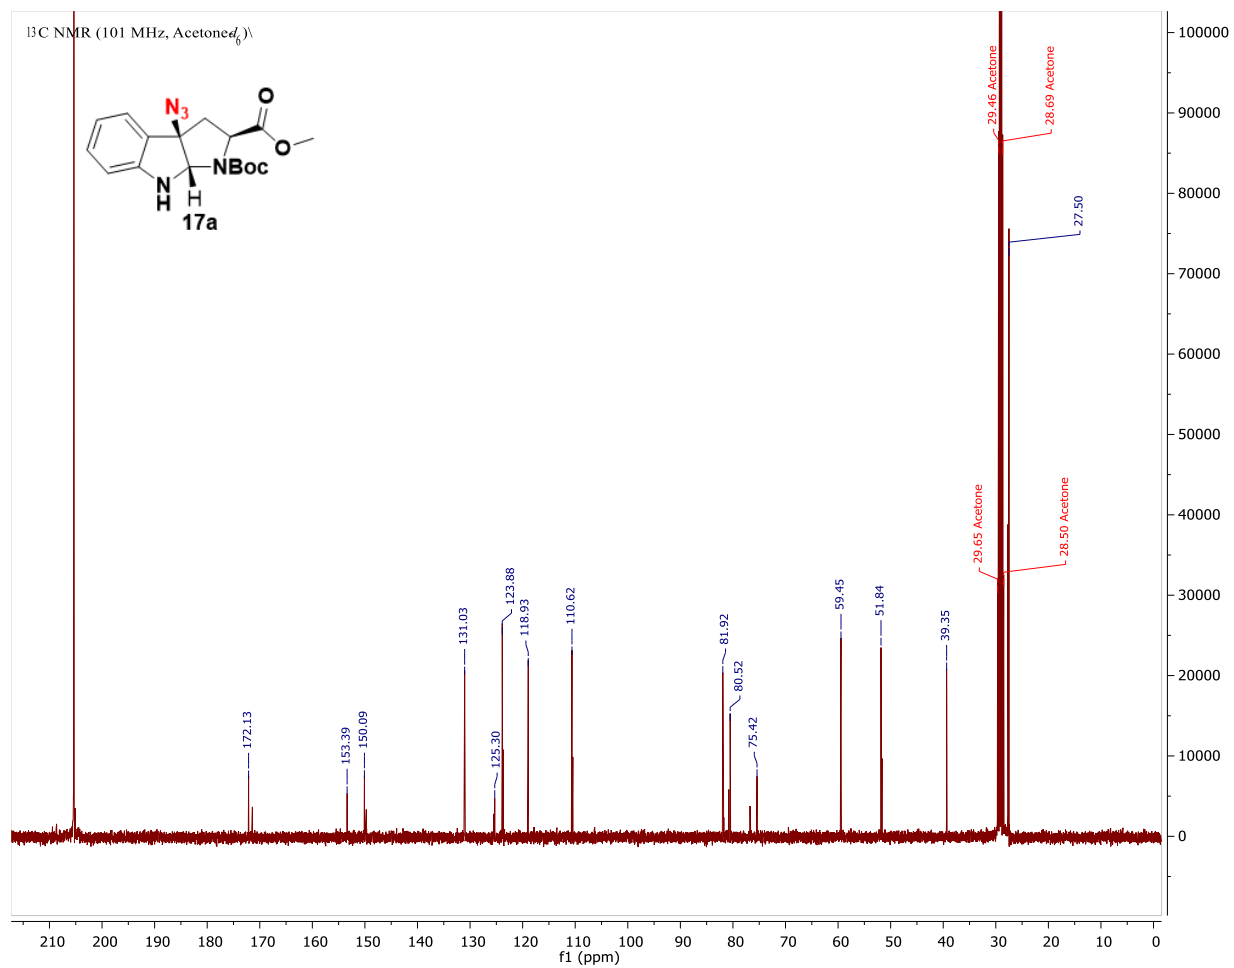



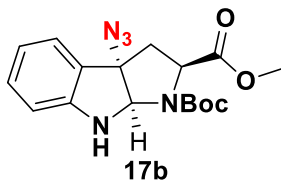

**Chemical Formula:** C<sub>17</sub>H<sub>21</sub>N<sub>5</sub>O<sub>4</sub>

**Exact Mass:** 359.1594

**Molecular Weight:** 359.3860

**<sup>1</sup>H NMR**(300 MHz, Acetone-*d*<sub>6</sub>) minor diastereomer and rotamers, *anti-cis* δ (ppm) 7.26 (d, *J* = 7.5 Hz, 1H), 7.21 – 7.10 (m, 1H), 6.79 – 6.67 (m, 2H), 6.03 (br s, 1H), 5.36, 5.30 (two s, 1H), 4.64 – 4.46 (m, 1H), 3.21, 3.17 (two s, 3H), 2.79 – 2.62 (m, 2H), 1.51, 1.39 (two s, 9H).

**<sup>13</sup>C NMR** (75 MHz, Acetone-*d*<sub>6</sub>) minor diastereomer and major rotamer, *anti-cis* δ (ppm) 27.60, 38.83, 51.32, 59.42, 75.45, 80.04, 81.23, 110.18, 118.31, 124.18, 124.20, 131.12, 151.50, 153.44, 170.91.

**HRMS** (ESI-TOF, *m/z*): [M+Na]<sup>+</sup> calculated 359.1594; found 359.1592 for C<sub>17</sub>H<sub>21</sub>N<sub>5</sub>O<sub>4</sub>Na

**TLC** (ethyl acetate:hexane, 1:4 v/v): R<sub>f</sub> = 0.65 (UV, I<sub>2</sub>, p-anisaldehyde).

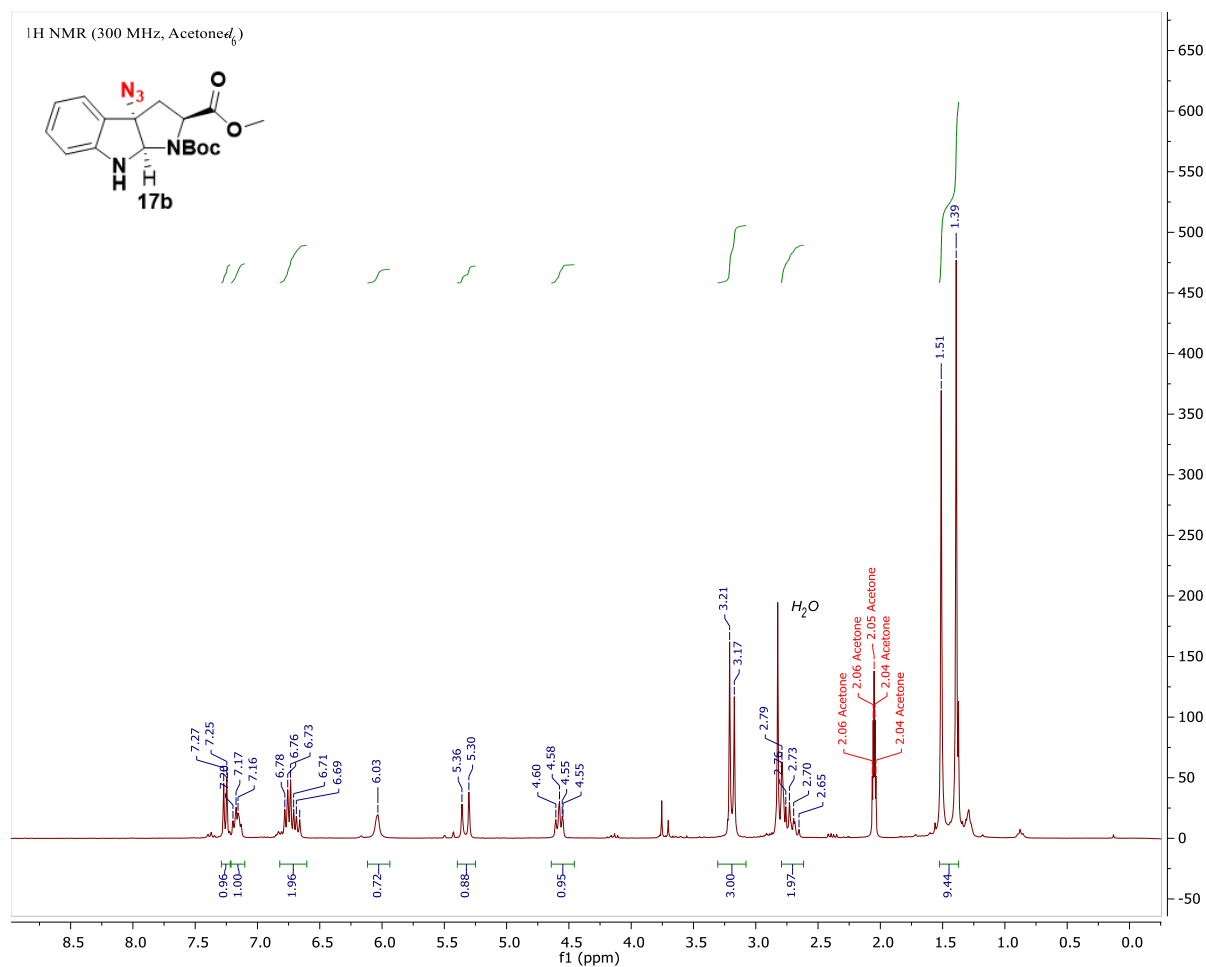

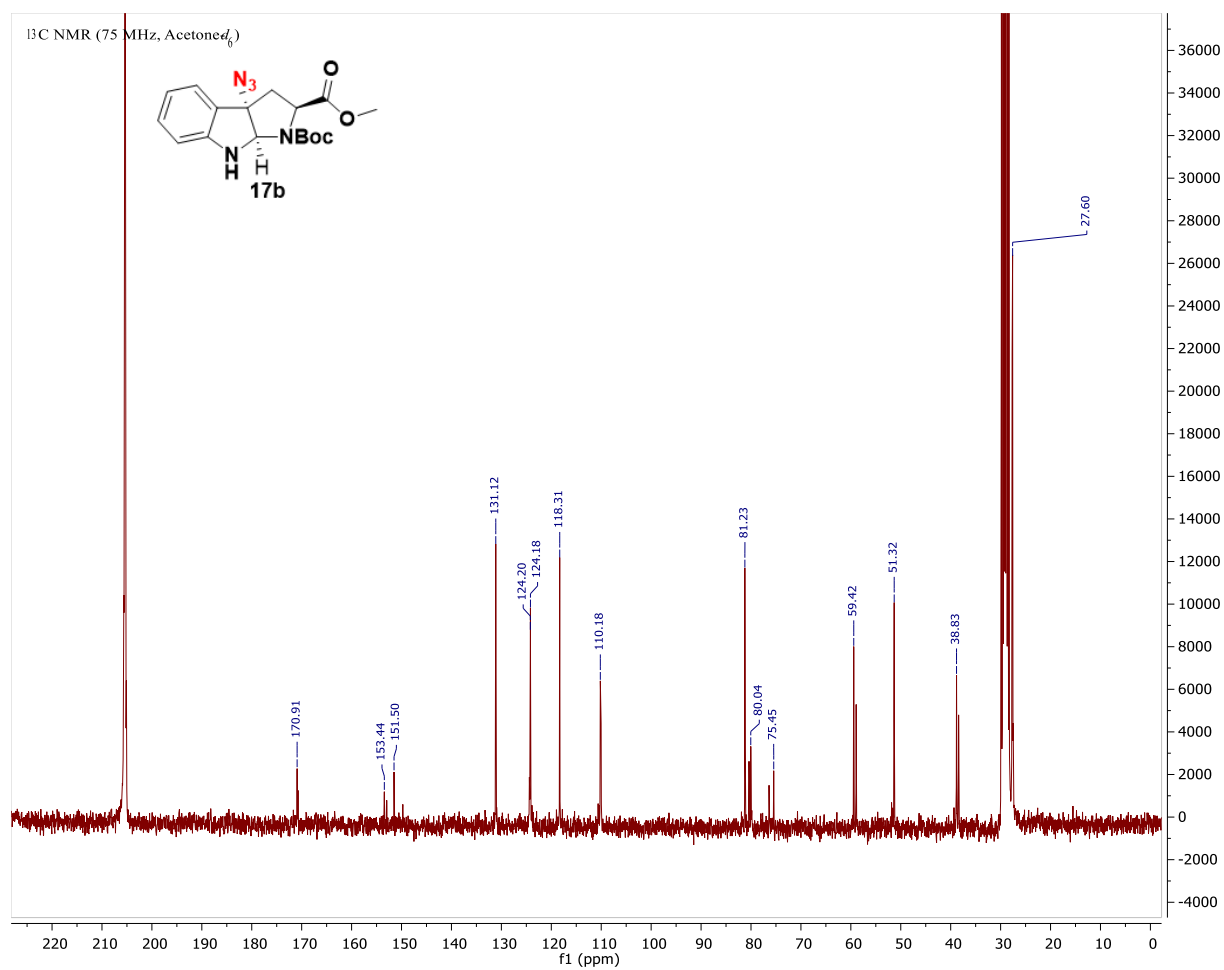

## Synthesis and characterization of compound **18a,b**

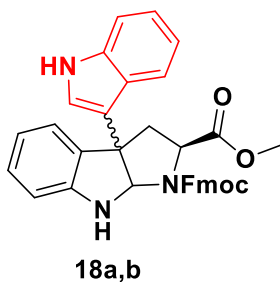

Chemical Formula: C<sub>35</sub>H<sub>29</sub>N<sub>3</sub>O<sub>4</sub>

Exact Mass: 555.22

Molecular Weight: 555.63

**1-((9H-fluoren-9-yl)methyl) 2-methyl (2S)-3a-(1H-indol-3-yl)-3,3a,8,8a-tetrahydropyrrolo[2,3-b]indole-1,2(2H)-dicarboxylate (18a,b).** A flame-dried round bottom flask under positive Ar atmosphere was charged with N-Fmoc-FPI-OMe (**5a,b**, 1 equiv, 150 mg, 0.33mmol) in 5.24 mL of anhydrous DCM followed by indole (recrystallized from hexanes prior to use, 1.15 equiv, 44 mg, 0.38 mmol) and 1.3 mL of HFIP. The reaction contents were stirred at 21 °C for 2 h. Upon completion, the crude (yellow and clear) was concentrated under reduced pressure and purified by silica gel flash column chromatography (gradient elution, 3:7 to 4.5:6.5 diethyl ether:petroleum ether) to afford 78.3 mg (0.141 mmol) of **18a,b** and 49 mg (0.088 mmol) of **19** as beige solids in 70 % overall yield.

**<sup>1</sup>H NMR** (300 MHz, Methylene Chloride-*d*<sub>2</sub>) two diastereomers and rotamers, *syn-cis:anti-cis* (1:1.4) δ (ppm) 8.24 (d, *J* = 15.1 Hz, 1H), 7.82 (d, *J* = 34.4 Hz, 2H), 7.69 – 7.43 (m, 4H), 7.42 – 7.27 (m, 4H), 7.23 – 7.02 (m, 4H), 6.91 – 6.35 (m, 3H), 5.90 (s, 0H), 5.77 (s, 0H), 5.44 (s, 0H), 5.38 (s, 0H), 4.87 – 3.96 (m, 5H), 3.70 (s, 1.2H), 3.19-3.20 (s, 0.8 H; s, 0.9 H), 3.16 – 2.71 (m, 2H).

**<sup>13</sup>C NMR** (75 MHz, Methylene Chloride-*d*<sub>2</sub>) two diastereomers and rotamers, *syn-cis:anti-cis* (1:1.4) δ (ppm) 40.03, 40.19, 40.66, 40.83, 47.34, 47.41, 47.53, 52.02, 52.13, 52.31, 52.46, 55.35, 55.42, 56.18, 56.28, 59.49, 59.72, 59.82, 59.88, 66.30, 66.71, 67.55, 67.62, 81.59, 81.70, 82.41, 82.88, 109.43, 109.58, 109.78, 110.31, 111.71, 111.73, 111.78, 116.86, 117.01, 117.63, 117.70, 118.75, 118.87, 118.93, 119.24, 119.68, 119.71, 119.74, 119.77, 119.81, 119.84, 119.99, 120.02, 120.03, 120.13, 120.18, 120.22, 120.35, 122.19, 122.26, 122.29, 122.34, 122.56, 122.78, 123.94, 124.14, 124.33, 124.37, 124.60, 124.76, 125.00, 125.03, 125.11, 125.18, 125.23, 127.14, 127.21, 127.34, 127.37, 127.50, 127.77, 127.79, 127.85, 127.92, 128.06, 128.76, 128.93, 129.03, 130.69, 130.94, 131.24, 131.81, 137.32, 137.35, 137.39, 137.46, 141.25, 141.31, 141.37, 141.41, 141.71, 143.58, 143.96, 144.07, 144.10, 144.13, 144.33, 147.99, 148.52, 149.35, 149.90, 153.94, 153.96, 154.55, 154.76, 171.45, 171.58, 172.62, 173.14.

**HRMS** (ESI-TOF, *m/z*): [M+Na]<sup>+</sup> calculated 578.2056; found 578.2062.

**TLC** (diethyl ether:petroleum ether, 6:4 v/v): R<sub>f</sub> = 0.45 (UV, I<sub>2</sub>, p-anisaldehyde).

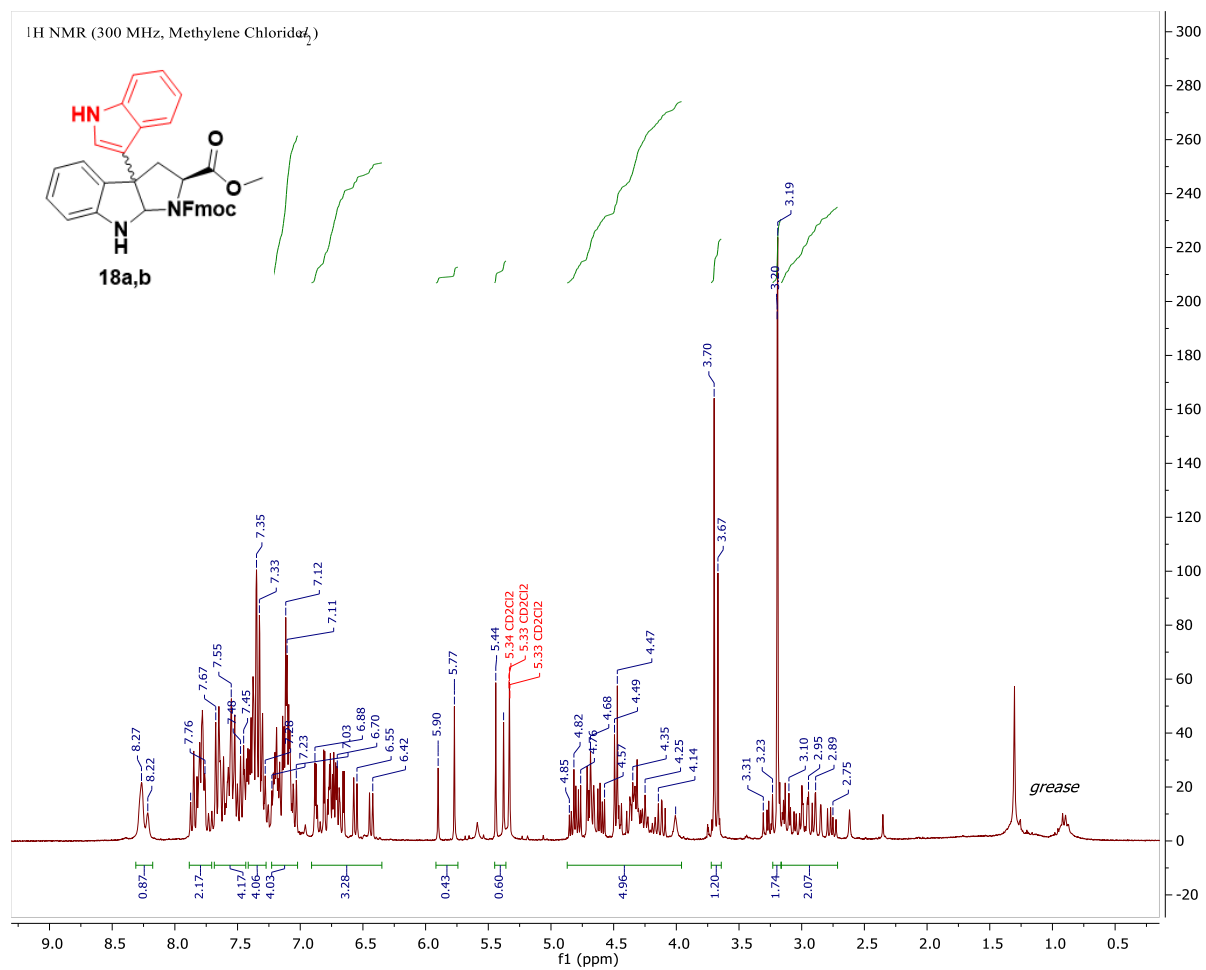

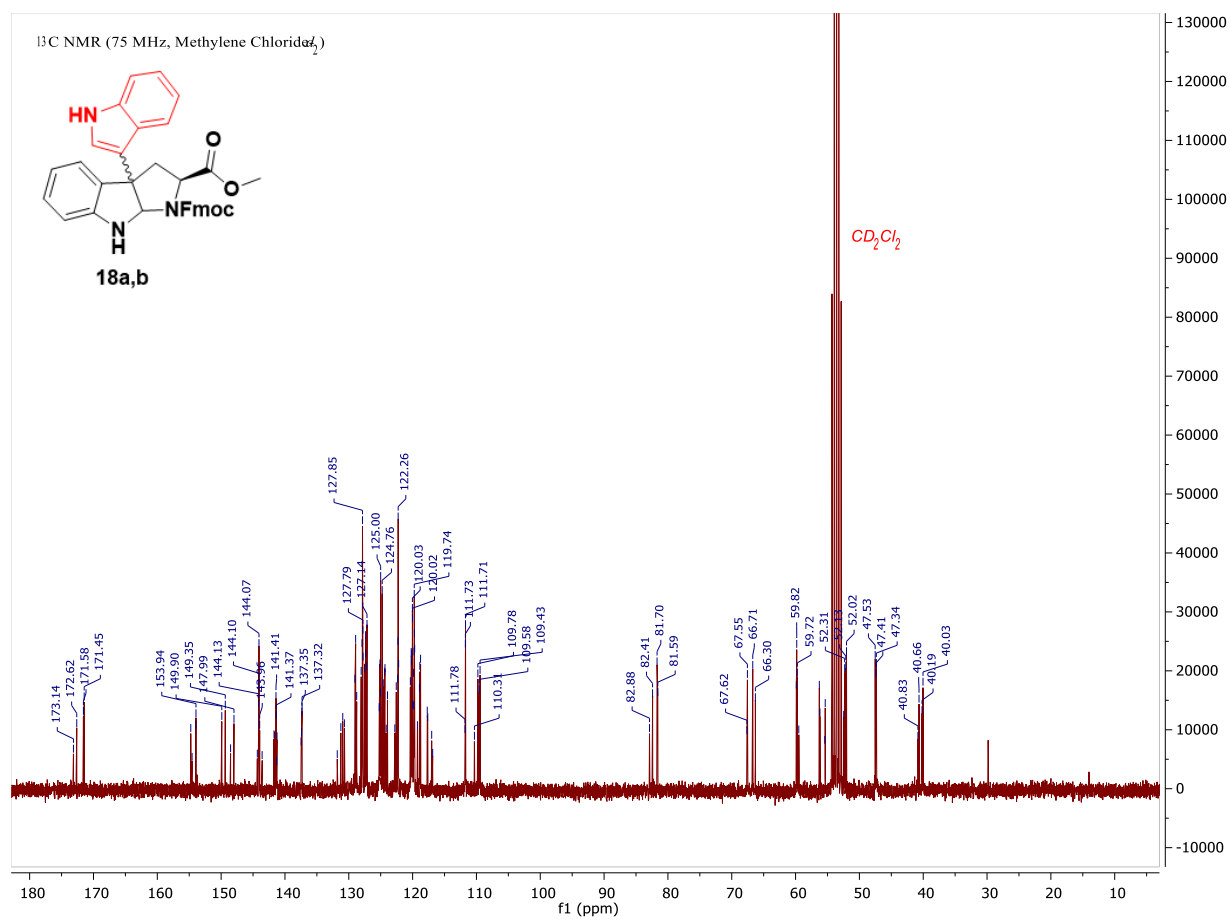

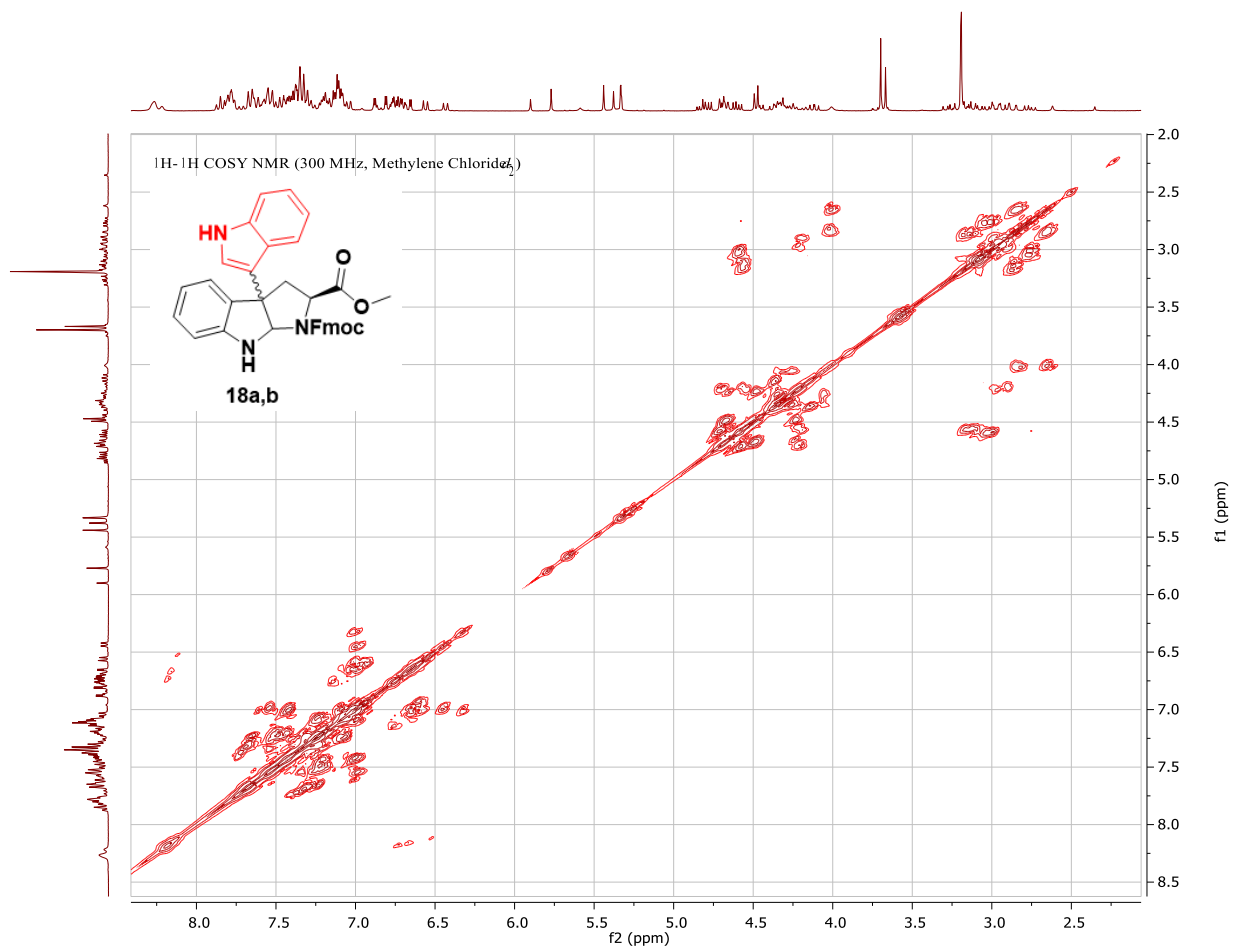

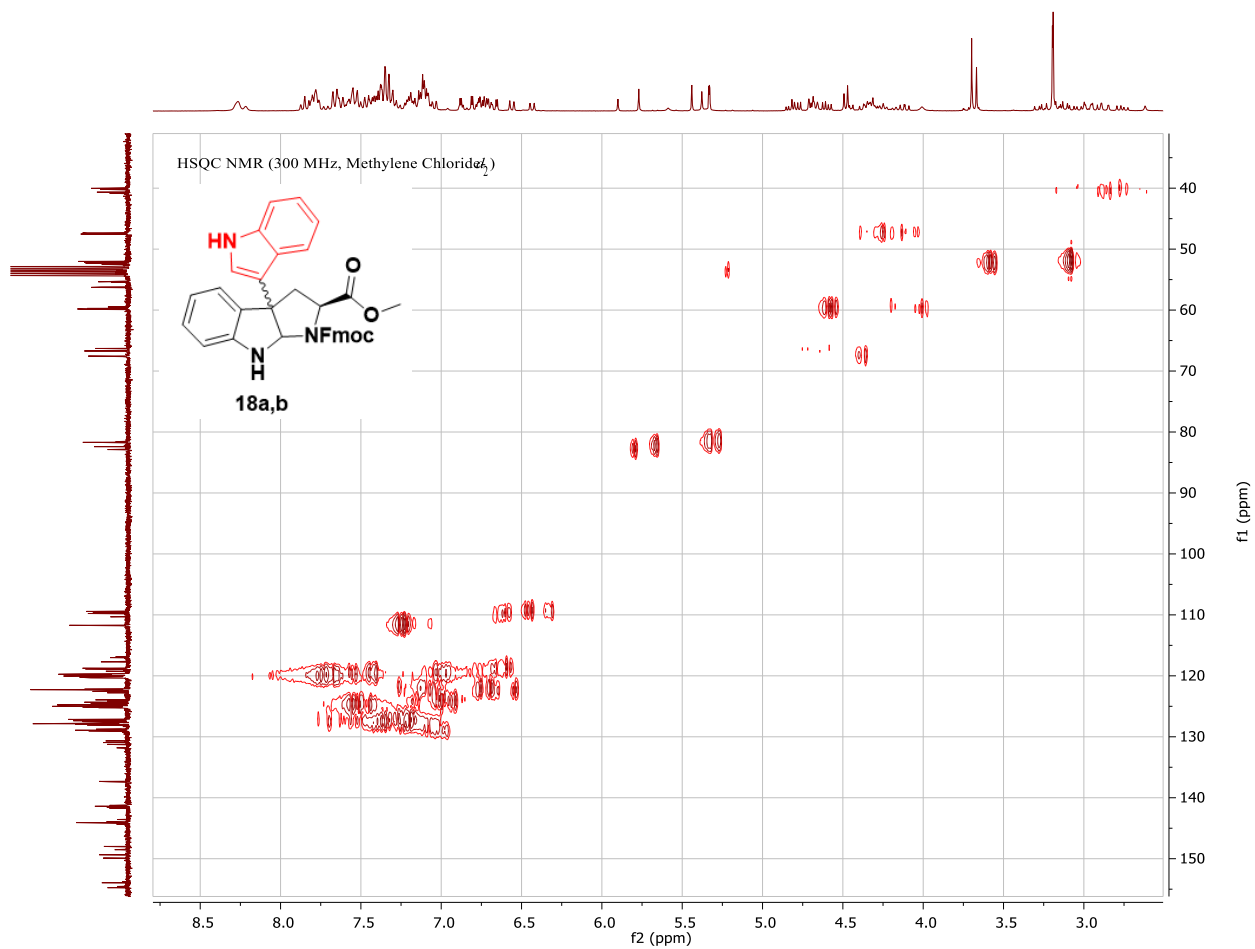

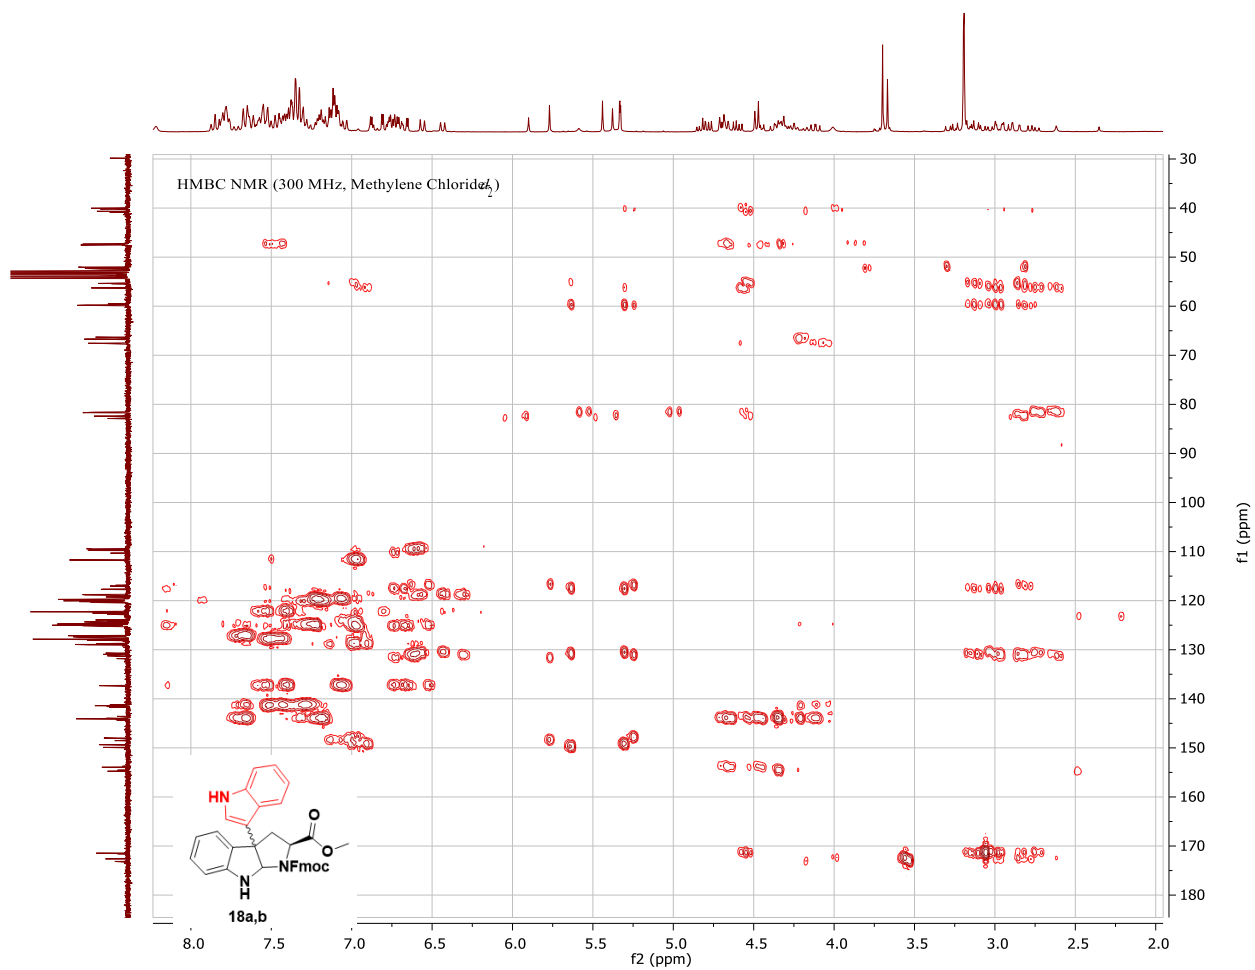



## Synthesis and characterization of compound **19**

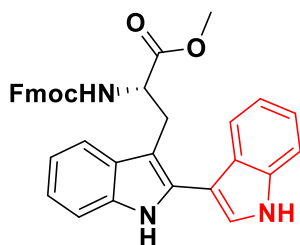

**19** 27%<sup>b,e</sup>

**19** 63%<sup>d,e</sup>

Chemical Formula: C<sub>35</sub>H<sub>29</sub>N<sub>3</sub>O<sub>4</sub>

Exact Mass: 555.22

Molecular Weight: 555.63

**Methyl (S)-2-((((9H-fluoren-9-yl)methoxy)carbonyl)amino)-3-(1H,1'H-[2,3'-biindol]-3-yl)propanoate (19).** A flame-dried round bottom flask under positive Ar atmosphere was charged with N-Fmoc-FPI-OMe (**5a,b**, 1 equiv, 140.3 mg, 0.306 mmol) added indole (recrystallized from hexanes prior to use, 1.15 equiv, 41.2 mg, 0.35 mmol) dissolved in 5.7 mL of DCM, followed by HFIP (1.42 mL). The reaction contents were stirred at 41°C for 3 h. Upon completion, the crude (yellow and clear) was concentrated under reduced pressure and purified by silica gel flash column chromatography (gradient elution 3:7 4.5:6.5 to diethyl ether:petroleum) to afford 19.6 mg (0.035 mmol) of **18a,b** and 107 mg (0.19 mmol) of **19** as beige solids in 73 % overall yield.

**<sup>1</sup>H NMR** (400 MHz, Acetonitrile-*d*<sub>3</sub>) δ (ppm) 9.63 (s, 1H), 9.40 (s, 1H), 7.82 (d, *J* = 7.7 Hz, 2H), 7.70 (d, *J* = 8.0 Hz, 1H), 7.60 (d, *J* = 7.8 Hz, 1H), 7.55 – 7.50 (m, 3H), 7.46 – 7.37 (m, 3H), 7.35 – 7.07 (m, 7H), 5.73 (d, *J* = 8.1 Hz, 1H), 4.45 – 4.38 (m, 1H), 4.16 – 4.02 (m, 3H), 3.46–3.29 (m, 5H).

**<sup>13</sup>C NMR** (101 MHz, Acetonitrile-*d*<sub>3</sub>) δ (ppm) 27.36, 47.02, 51.71, 54.99, 66.39, 106.37, 107.59, 111.01, 111.92, 117.42, 118.20, 119.37, 119.71, 120.07, 120.08, 120.17, 121.41, 122.43, 124.75, 125.27, 125.34, 126.37, 127.21, 127.23, 127.79, 128.98, 131.52, 136.32, 136.51, 141.20, 144.16, 155.75, 172.55.

**HRMS** (ESI-TOF, *m/z*): [M+Na]<sup>+</sup> calculated 578.2056; found 578.2050.

**TLC** (diethyl ether:petroleum ether, 6:4 v/v): R<sub>f</sub> = 0.4 (UV, I<sub>2</sub>, p-anisaldehyde).

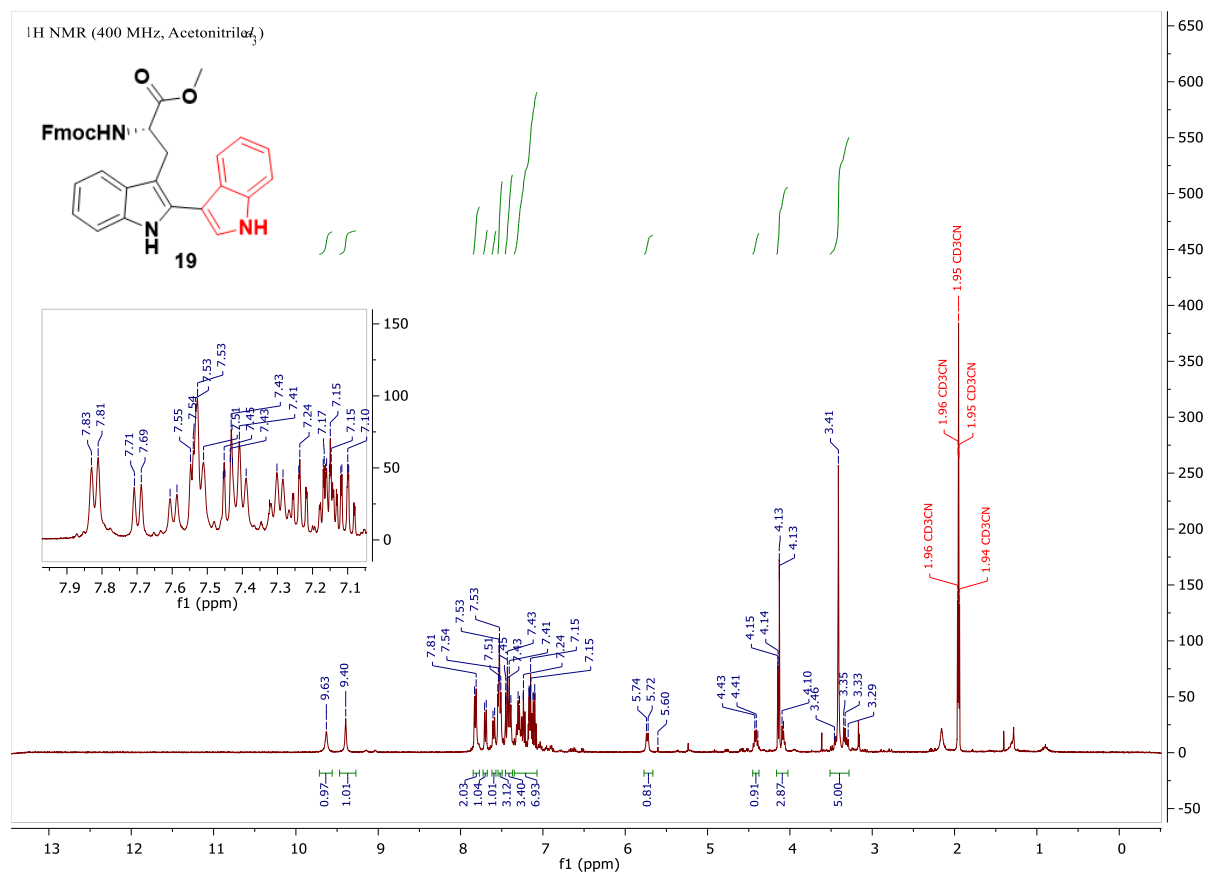

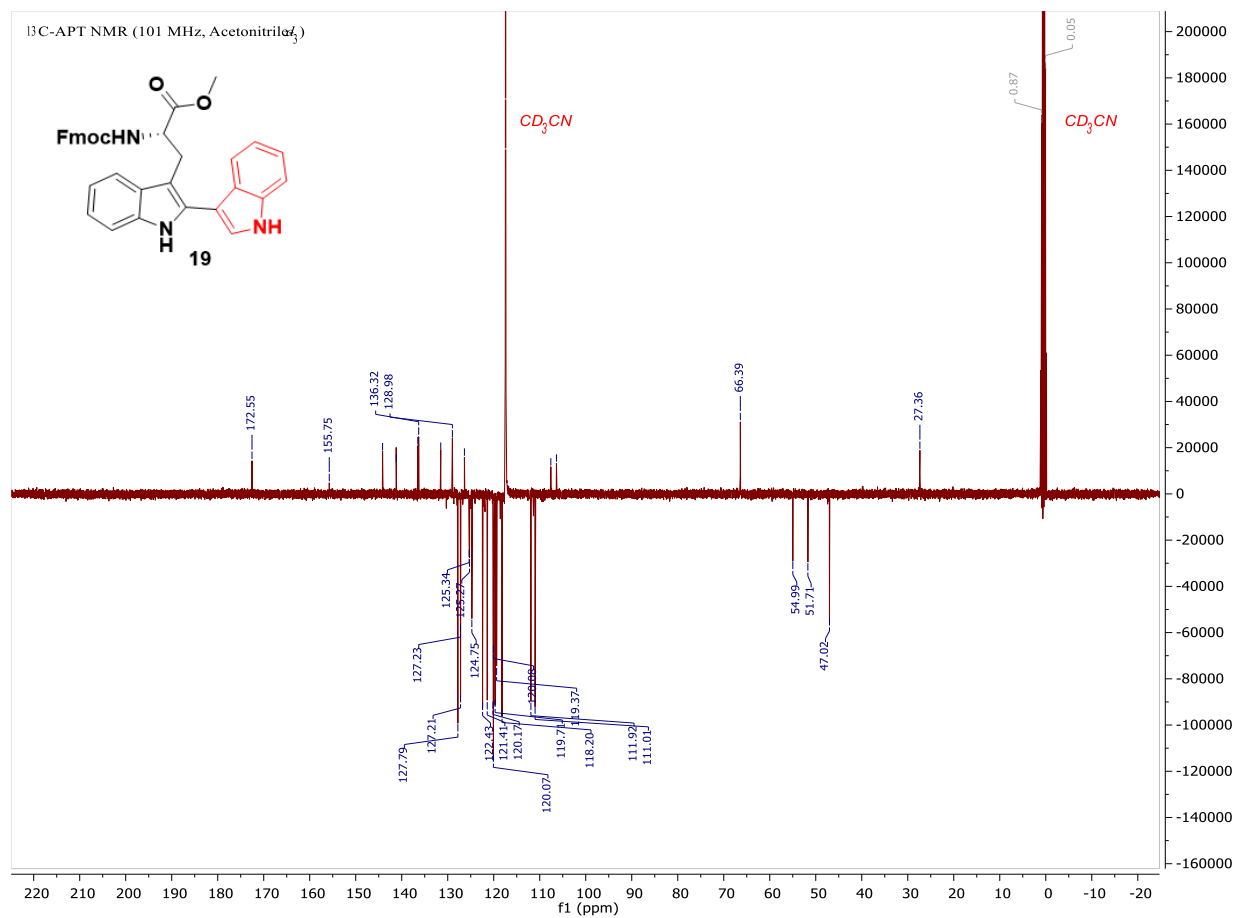

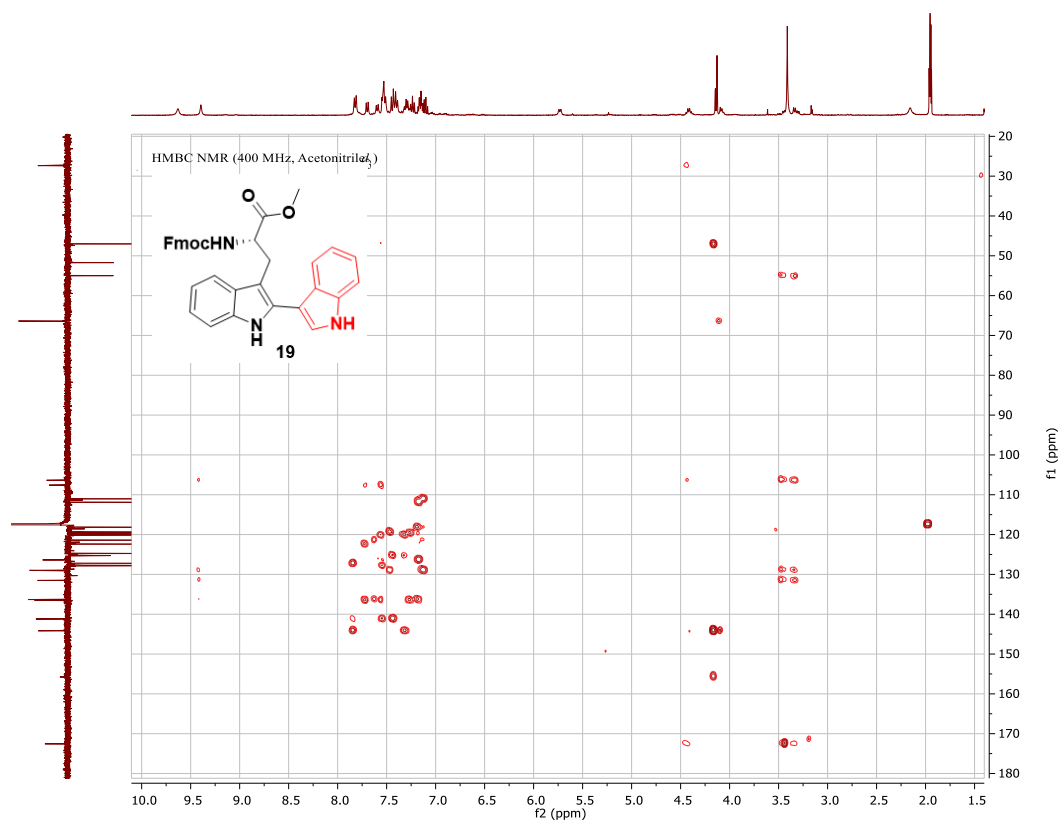

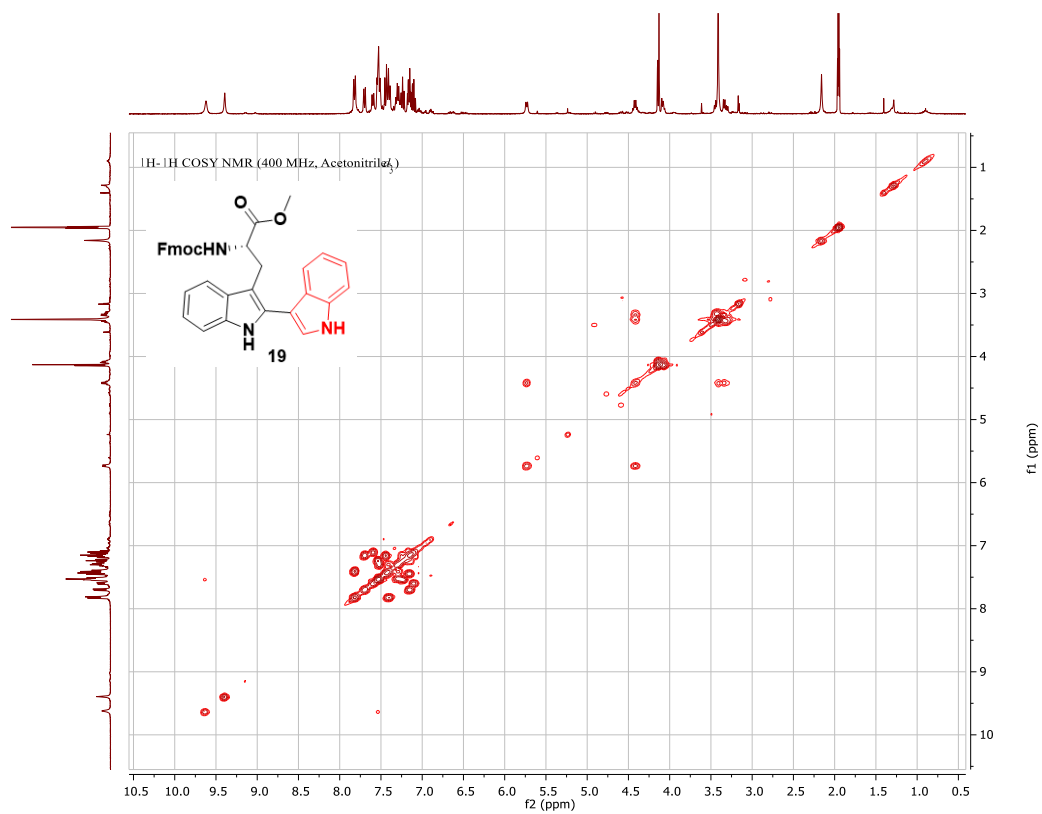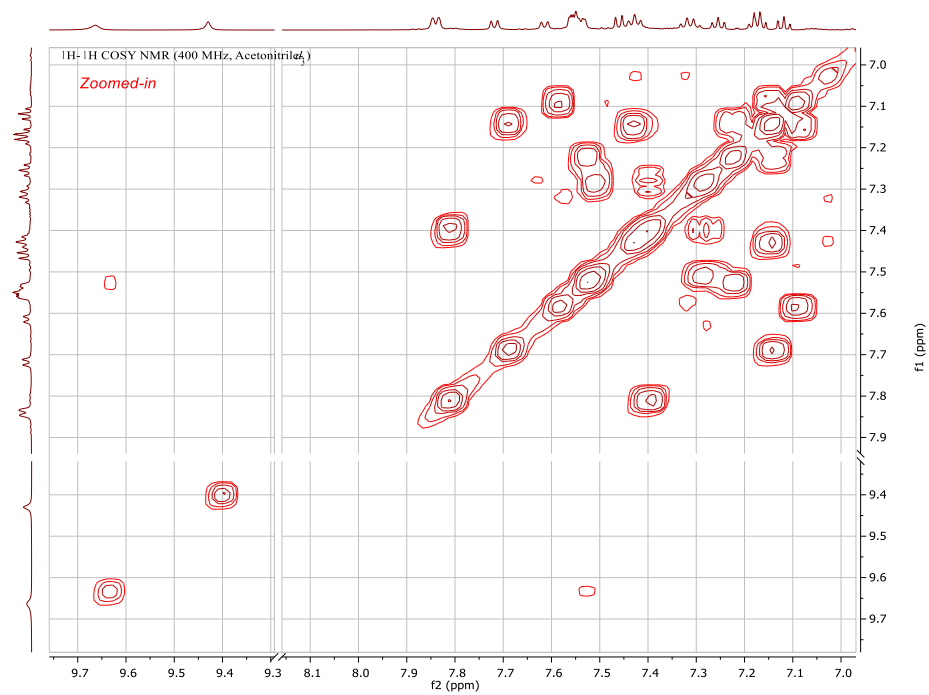



## Attempted synthesis of 20-22a,b

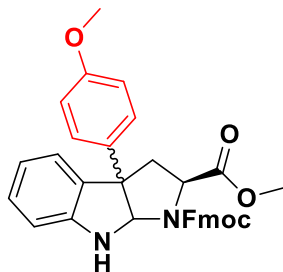

**20a,b** trace<sup>b,g</sup>

A small glass vial under a positive Ar atmosphere was charged with N-Fmoc-FPI-OMe (**5a,b**, 1 equiv, 5 mg, 11  $\mu\text{mol}$ ) in 176  $\mu\text{L}$  of anhydrous DCM, followed by anisole (2.5 equiv, 3.0 mg, 3.0  $\mu\text{L}$ , 27.5  $\mu\text{mol}$ ) and 44  $\mu\text{L}$  of HFIP. The reaction contents were stirred for 2 h at 21°C. TLC analysis (3:2 diethyl ether/pet ether) revealed numerous byproducts.

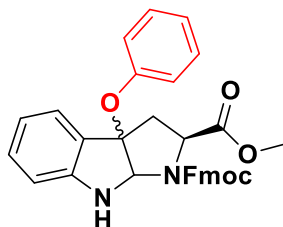

**21a,b** trace<sup>b,g</sup>

A small glass vial under a positive Ar atmosphere was charged with N-Fmoc-FPI-OMe (**5a,b**, 1 equiv, 5 mg, 11  $\mu\text{mol}$ ) in 176  $\mu\text{L}$  of anhydrous DCM, followed by phenol (2.5 equiv, 2.6 mg, 27.5  $\mu\text{mol}$ ) and 44  $\mu\text{L}$  of HFIP. The reaction contents were stirred for 2 h at 21°C. TLC analysis (3:2 diethyl ether/pet ether) revealed numerous byproducts.

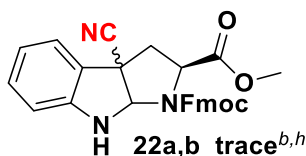

**22a,b** trace<sup>b,h</sup>

A small glass vial under a positive Ar atmosphere was charged with N-Fmoc-FPI-OMe (**5a,b**, 1 equiv, 10 mg, 22  $\mu\text{mol}$ ) in 352  $\mu\text{L}$  of anhydrous DCM, followed by TMSCN (2.5 equiv, 5.5 mg, 6.9  $\mu\text{L}$ , 55  $\mu\text{mol}$ ) and 88  $\mu\text{L}$  of HFIP. The reaction contents were stirred for 2 h at 21°C. TLC analysis (3:2 diethyl ether/pet ether), crude  $^1\text{H}$ - and  $^{19}\text{F}$ -NMR revealed no conversion, starting material was recovered. The reaction was also attempted with KCN as a cyanide source under same conditions as described for TMSCN, starting material was recovered.

## References

1. Armarego, W. L. F.; Chai, C. L. L., Chapter 4 - Purification of Organic Chemicals. In *Purification of Laboratory Chemicals (Fifth Edition)*, Butterworth-Heinemann: Burlington, 2003; pp 80-388.
2. May, J. P.; Perrin, D. M., Intraannular Savige-Fontana reaction: One-step conversion of one class of monocyclic peptides into another class of bicyclic peptides. *Chem.-Eur. J.* **2008**, *14* (11), 3404-3409.
3. Cousins, B. G.; Das, A. K.; Sharma, R.; Li, Y. N.; McNamara, J. P.; Hillier, I. H.; Kinloch, I. A.; Ulijn, R. V., Enzyme-Activated Surfactants for Dispersion of Carbon Nanotubes. *Small* **2009**, *5* (5), 587-590.
4. Wu, W. B.; Li, Z.; Zhou, G. B.; Jiang, S., Total synthesis of argyrins A and E. *Tetrahedron Letters* **2011**, *52* (19), 2488-2491.
5. Fujiwara, T.; Yasuda, H.; Nishimura, Y.; Nambu, H.; Yakura, T., Synthesis of 10b-fluorinated analogues of protubonine A and its 11a-epimer via fluorocyclisation of tryptophan-containing dipeptides. *RSC Adv.* **2015**, *5* (7), 5464-5473.
6. Taniguchi, M.; Hino, T., CYCLIC TAUTOMERS OF TRYPTOPHANS AND TRYPTAMINES .4. SYNTHESIS OF CYCLIC TAUTOMERS OF TRYPTOPHANS AND TRYPTAMINES. *Tetrahedron* **1981**, *37* (8), 1487-1494.
7. Crich, D.; Banerjee, A., Chemistry of the hexahydropyrrolo 2,3-b indoles: Configuration, conformation, reactivity, and applications in synthesis. *Accounts of Chemical Research* **2007**, *40* (2), 151-161.
8. Fujiwara, T.; Seki, T.; Yakura, T.; Takeuchi, Y., Useful procedures for fluorocyclization of tryptamine and tryptophol derivatives to 3a-fluoropyrrolo 2,3-b indoles and 3a-fluorofuro 2,3-b indoles. *Journal of Fluorine Chemistry* **2014**, *165*, 7-13.



## Crystal Structure of compound **2b**: Data and Experimental

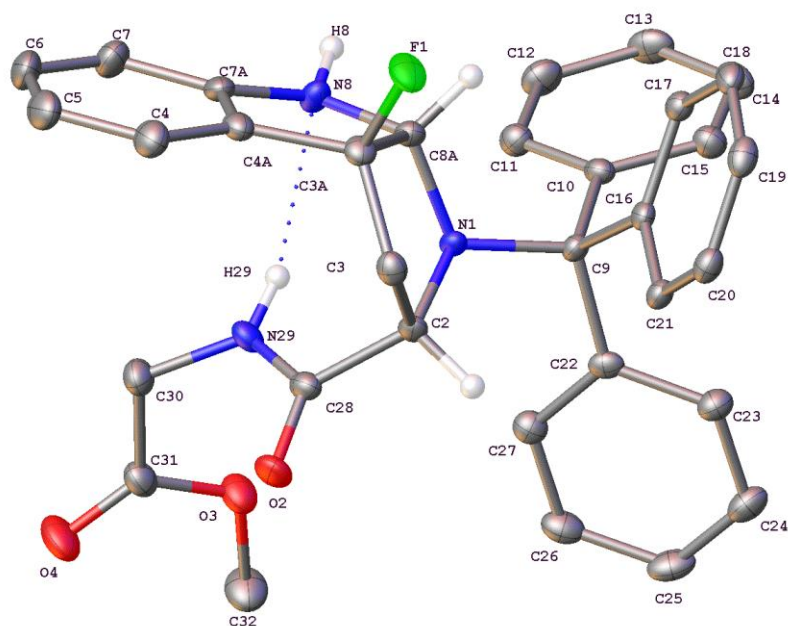

### Sample ID: dp062

**Experimental.** Single colourless rod-shaped crystals of **dp062** were recrystallised from a mixture of hexane and EtOAc by slow evaporation. A suitable crystal 0.40×0.11×0.10 mm<sup>3</sup> was selected and mounted on a mylar loop in oil on a Bruker APEX II area detector diffractometer. The crystal was kept at a steady  $T = 90(2)$  K during data collection. The structure was solved with the **XT** (Sheldrick, 2015) structure solution program using the Intrinsic Phasing solution method and by using **Olex2** (Dolomanov et al., 2009) as the graphical interface. The model was refined with version 2018/3 of **XL** (Sheldrick, 2015) using Least Squares minimisation.

**Crystal Data.** C<sub>37</sub>H<sub>38</sub>FN<sub>3</sub>O<sub>5</sub>,  $M_r = 623.70$ , monoclinic,  $P2_1$  (No. 4),  $a = 11.8601(2)$  Å,  $b = 14.1617(3)$  Å,  $c = 20.1222(4)$  Å,  $\beta = 105.4830(10)^\circ$ ,  $\alpha = \gamma = 90^\circ$ ,  $V = 3257.06(11)$  Å<sup>3</sup>,  $T = 90(2)$  K,  $Z = 4$ ,  $Z' = 2$ ,  $\mu(\text{CuK}\alpha) = 0.723$ , 84520 reflections measured, 11434 unique ( $R_{\text{int}} = 0.0406$ ) which were used in all calculations. The final  $wR_2$  was 0.0951 (all data) and  $R_1$  was 0.0353 ( $I > 2(I)$ ).

**Compound****AP-E512-F45-48**

|                              |                                                                |
|------------------------------|----------------------------------------------------------------|
| Formula                      | C <sub>37</sub> H <sub>38</sub> FN <sub>3</sub> O <sub>5</sub> |
| $D_{calc.}/\text{g cm}^{-3}$ | 1.272                                                          |
| $\mu/\text{mm}^{-1}$         | 0.723                                                          |
| Formula Weight               | 623.70                                                         |
| Colour                       | colourless                                                     |
| Shape                        | rod                                                            |
| Size/mm <sup>3</sup>         | 0.40×0.11×0.10                                                 |
| $T/\text{K}$                 | 90(2)                                                          |
| Crystal System               | monoclinic                                                     |
| Flack Parameter              | -0.05(5)                                                       |
| Hooft Parameter              | -0.03(3)                                                       |
| Space Group                  | $P2_1$                                                         |
| $a/\text{\AA}$               | 11.8601(2)                                                     |
| $b/\text{\AA}$               | 14.1617(3)                                                     |
| $c/\text{\AA}$               | 20.1222(4)                                                     |
| $\alpha/^\circ$              | 90                                                             |
| $\beta/^\circ$               | 105.4830(10)                                                   |
| $\gamma/^\circ$              | 90                                                             |
| $V/\text{\AA}^3$             | 3257.06(11)                                                    |
| $Z$                          | 4                                                              |
| $Z'$                         | 2                                                              |
| Wavelength/ $\text{\AA}$     | 1.54178                                                        |
| Radiation type               | CuK $_{\alpha}$                                                |
| $\Theta_{min}/^\circ$        | 2.278                                                          |
| $\Theta_{max}/^\circ$        | 66.689                                                         |
| Measured Refl.               | 84520                                                          |
| Independent Refl.            | 11434                                                          |
| Reflections with $I > 2(I)$  | 11129                                                          |
| $R_{int}$                    | 0.0406                                                         |
| Parameters                   | 872                                                            |
| Restraints                   | 1377                                                           |
| Largest Peak                 | 0.572                                                          |
| Deepest Hole                 | -0.339                                                         |
| GooF                         | 1.020                                                          |
| $wR_2$ (all data)            | 0.0951                                                         |
| $wR_2$                       | 0.0940                                                         |
| $R_1$ (all data)             | 0.0364                                                         |
| $R_1$                        | 0.0353                                                         |

## Structure Quality Indicators

|              |            |          |             |      |                  |       |
|--------------|------------|----------|-------------|------|------------------|-------|
| Reflections: | d min (Cu) | 0.84     | I/ $\sigma$ | 47.2 | R <sub>int</sub> | 4.06% |
|              | complete   | 99%      |             |      |                  |       |
| Refinement:  | Shift      | 0.004    | Max Peak    | 0.6  | Min Peak         | -0.3  |
|              | Flack      | -0.05(5) |             |      | Goof             | 1.020 |

A colourless rod-shaped crystal with dimensions 0.40×0.11×0.10 mm<sup>3</sup> was mounted on a mylar loop in oil. Data were collected using a Bruker APEX II area detector diffractometer equipped with an Oxford Cryosystems low-temperature device operating at  $T = 90(2)$  K.

Data were measured using  $\phi$  and  $\omega$  scans of 1.0 ° per frame for between 2 and 10 s using CuK $\alpha$  radiation (microfocus sealed X-ray tube, 45 kV, 0.60 mA). The total number of runs and images was based on the strategy calculation from the program APEX3. The maximum resolution that was achieved was  $\theta = 66.689^\circ$  (0.84 Å).

The diffraction pattern was indexed and the unit cell was refined using **SAINT** (Bruker, V8.38A, after 2013) on 9951 reflections, 12% of the observed reflections. Data reduction, scaling and absorption corrections were performed using **SAINT** (Bruker, V8.38A, after 2013). The final completeness is 99.90 % out to 66.689° in  $\theta$ .

A numerical absorption correction was performed using **SADABS**-2016/2 (Bruker, 2016/2).  $wR_2(\text{int})$  was 0.0934 before and 0.0552 after correction. The ratio of minimum to maximum transmission is 0.8381. The  $\lambda/2$  correction factor is not present. The absorption coefficient  $\mu$  of this material is 0.723 mm<sup>-1</sup> at this wavelength ( $\lambda = 1.542\text{Å}$ ) and the minimum and maximum transmissions are 0.787 and 0.940.

The structure was solved and the space group  $P2_1$  (# 4) determined by the **XT** (Sheldrick, 2015) structure solution program using Intrinsic Phasing and refined by Least Squares using version 2018/3 of **XL** (Sheldrick, 2015). There are two chemically identical but crystallographically different molecules in the asymmetric unit. Additionally, the material crystallizes with two molecules of EtOAc in the asymmetric unit. One solvent molecule is disordered and was modeled in two orientations. Each molecule contains three chiral carbons, C2, C3A and C8A, whose absolute configurations were determined to be S, S and R, respectively. All non-hydrogen atoms were refined anisotropically. Most hydrogen atom positions were calculated geometrically and refined using the riding model, however all N—H hydrogen atoms were located in difference maps and refined freely.

The value of  $Z'$  is 2. This means that there are two independent molecules in the asymmetric unit.

The Flack parameter was refined to -0.05(5). Determination of absolute structure using Bayesian statistics on Bijvoet differences using the Olex2 results in -0.03(3). Note: The Flack parameter is used to determine chirality of the crystal studied, the value should be near 0, a value of 1 means that the stereochemistry is wrong and the model should be inverted. A value of 0.5 means that the crystal consists of a racemic mixture of the two enantiomers.

**Table 1:** Fractional Atomic Coordinates ( $\times 10^4$ ) and Equivalent Isotropic Displacement Parameters ( $\text{\AA}^2 \times 10^3$ ) for **dp062**.  $U_{eq}$  is defined as 1/3 of the trace of the orthogonalised  $U_{ij}$ .

| Atom  | x           | y          | z          | $U_{eq}$ |
|-------|-------------|------------|------------|----------|
| C35A  | 10143(13)   | 2200(20)   | 3407(15)   | 62(8)    |
| C36A  | 9013(9)     | 2617(9)    | 3050(6)    | 52(4)    |
| F1_1  | 9757.7(14)  | 3077.4(12) | 7068.0(8)  | 24.1(4)  |
| O2_1  | 10130.6(17) | 5733.4(13) | 5272.5(11) | 24.5(4)  |
| O3_1  | 9772.4(17)  | 4957.9(15) | 3608.9(10) | 24.7(4)  |
| O4_1  | 11583.7(18) | 5500.8(17) | 3696.6(11) | 32.7(5)  |
| O5_1  | 12170(3)    | 1682(2)    | 3708(2)    | 83.1(12) |
| O6_1  | 11023(3)    | 2873(2)    | 3267.5(15) | 53.5(7)  |
| N1_1  | 8476.0(17)  | 3593.0(14) | 5337.6(10) | 12.8(4)  |
| N8_1  | 10031.6(19) | 2411.2(16) | 5522.5(12) | 18.5(5)  |
| N29_1 | 10302.0(19) | 4266.2(16) | 4876.3(11) | 17.3(4)  |
| C2_1  | 8933(2)     | 4539.6(17) | 5576.5(13) | 14.1(5)  |
| C3_1  | 9504(2)     | 4462.2(18) | 6355.1(13) | 16.3(5)  |
| C3A_1 | 9931(2)     | 3447.5(18) | 6447.9(13) | 16.0(5)  |
| C4_1  | 12200(2)    | 3657(2)    | 6824.7(14) | 23.1(6)  |
| C4A_1 | 11167(2)    | 3265.7(19) | 6430.2(13) | 17.9(5)  |
| C5_1  | 13248(2)    | 3366(2)    | 6703.2(16) | 27.3(6)  |
| C6_1  | 13242(2)    | 2702(2)    | 6196.0(17) | 29.0(7)  |
| C7_1  | 12210(2)    | 2317(2)    | 5787.6(16) | 25.6(6)  |
| C7A_1 | 11163(2)    | 2616.5(18) | 5909.4(14) | 18.3(5)  |
| C8A_1 | 9175(2)     | 2890.7(18) | 5817.3(13) | 15.0(5)  |
| C9_1  | 7174(2)     | 3481.9(17) | 5174.5(12) | 13.2(5)  |
| C10_1 | 6817(2)     | 2535.8(17) | 4794.5(13) | 14.5(5)  |
| C11_1 | 7531(2)     | 2078.6(18) | 4449.8(13) | 17.5(5)  |
| C12_1 | 7152(2)     | 1265(2)    | 4069.5(14) | 22.5(6)  |
| C13_1 | 6050(2)     | 898.6(19)  | 4021.4(14) | 24.2(6)  |
| C14_1 | 5317(2)     | 1370(2)    | 4345.1(14) | 23.5(6)  |
| C15_1 | 5696(2)     | 2177.3(18) | 4728.3(13) | 18.4(5)  |
| C16_1 | 6789(2)     | 3555.5(18) | 5845.6(12) | 13.4(5)  |
| C17_1 | 6647(2)     | 2763.7(18) | 6231.6(13) | 15.6(5)  |
| C18_1 | 6418(2)     | 2862.8(19) | 6869.9(13) | 18.0(5)  |
| C19_1 | 6359(2)     | 3752(2)    | 7145.9(13) | 19.0(5)  |
| C20_1 | 6491(2)     | 4542.4(19) | 6773.7(13) | 17.7(5)  |
| C21_1 | 6693(2)     | 4444.0(18) | 6128.5(13) | 14.7(5)  |
| C22_1 | 6571(2)     | 4222.1(17) | 4635.2(12) | 14.5(5)  |
| C23_1 | 5432(2)     | 4517.4(19) | 4593.8(13) | 18.5(5)  |
| C24_1 | 4824(2)     | 5098.8(19) | 4060.9(14) | 21.6(5)  |
| C25_1 | 5351(3)     | 5393(2)    | 3558.2(14) | 23.8(6)  |
| C26_1 | 6481(3)     | 5111.5(19) | 3595.1(14) | 21.9(6)  |
| C27_1 | 7088(2)     | 4524.4(18) | 4124.6(13) | 17.4(5)  |
| C28_1 | 9833(2)     | 4900.1(18) | 5217.5(13) | 16.4(5)  |
| C30_1 | 11262(2)    | 4522(2)    | 4595.9(14) | 21.3(5)  |
| C31_1 | 10904(2)    | 5052.6(19) | 3920.1(14) | 20.3(5)  |
| C32_1 | 9373(3)     | 5442(3)    | 2954.6(15) | 31.0(7)  |
| C33_1 | 12032(4)    | 2447(3)    | 3419(2)    | 53.5(10) |
| C34_1 | 12940(4)    | 3018(4)    | 3189(3)    | 74.5(15) |
| C35_1 | 10005(9)    | 2406(13)   | 3425(7)    | 45(3)    |

| Atom   | x          | y          | z           | $U_{eq}$ |
|--------|------------|------------|-------------|----------|
| C36_1  | 9292(7)    | 1916(6)    | 2823(4)     | 58(2)    |
| F1_2   | 4952.7(13) | 5886.6(11) | 1908.9(7)   | 20.4(3)  |
| O2_2   | 4967.4(16) | 9094.3(13) | 569.9(10)   | 20.5(4)  |
| O3_2   | 4706.1(18) | 8423.3(16) | -1391.1(10) | 29.9(5)  |
| O4_2   | 6588.4(19) | 8603.9(17) | -1396.3(11) | 34.0(5)  |
| O4A_2  | 5878(4)    | 6457(2)    | -1059.9(15) | 68.9(9)  |
| O5A_2  | 6690(3)    | 5729(2)    | -1795.9(14) | 55.2(7)  |
| N1_2   | 3544.6(18) | 6794.6(14) | 290.3(11)   | 12.5(4)  |
| N8_2   | 5193.7(19) | 5768.5(16) | 292.2(12)   | 17.1(4)  |
| N29_2  | 5242.3(19) | 7846.1(16) | -78.7(11)   | 16.1(4)  |
| C2_2   | 3916(2)    | 7688.6(16) | 660.4(12)   | 13.4(5)  |
| C3_2   | 4516(2)    | 7419.1(18) | 1415.4(12)  | 15.1(5)  |
| C3A_2  | 5054(2)    | 6463.3(18) | 1353.6(12)  | 14.4(5)  |
| C4_2   | 7301(2)    | 6788.5(19) | 1746.0(14)  | 19.7(5)  |
| C4A_2  | 6285(2)    | 6435.3(18) | 1298.1(13)  | 15.4(5)  |
| C5_2   | 8354(2)    | 6649.9(19) | 1579.9(15)  | 22.8(6)  |
| C6_2   | 8384(2)    | 6161(2)    | 989.3(15)   | 22.6(6)  |
| C7_2   | 7373(2)    | 5808(2)    | 536.3(14)   | 20.8(5)  |
| C7A_2  | 6310(2)    | 5965.4(17) | 693.1(13)   | 16.2(5)  |
| C8A_2  | 4327(2)    | 6037.5(17) | 654.5(12)   | 13.7(5)  |
| C9_2   | 2255(2)    | 6592.5(17) | 133.8(13)   | 13.8(5)  |
| C10_2  | 1985(2)    | 5683.8(18) | -295.6(13)  | 16.2(5)  |
| C11_2  | 2593(2)    | 5485.8(19) | -783.7(14)  | 19.0(5)  |
| C12_2  | 2287(3)    | 4710(2)    | -1221.6(15) | 26.8(6)  |
| C13_2  | 1381(3)    | 4127(2)    | -1180.1(17) | 32.7(7)  |
| C14_2  | 779(3)     | 4315(2)    | -699.3(17)  | 35.0(7)  |
| C15_2  | 1063(3)    | 5090(2)    | -261.7(16)  | 26.6(6)  |
| C16_2  | 1897(2)    | 6549.6(18) | 817.4(13)   | 15.0(5)  |
| C17_2  | 2059(2)    | 5727.3(19) | 1219.3(14)  | 18.7(5)  |
| C18_2  | 1887(2)    | 5732(2)    | 1876.4(14)  | 22.6(6)  |
| C19_2  | 1534(2)    | 6547(2)    | 2143.5(14)  | 22.8(6)  |
| C20_2  | 1358(2)    | 7366(2)    | 1748.5(14)  | 20.7(5)  |
| C21_2  | 1542(2)    | 7362.4(19) | 1095.4(13)  | 17.3(5)  |
| C22_2  | 1577(2)    | 7364.9(18) | -355.2(12)  | 16.0(5)  |
| C23_2  | 375(2)     | 7480(2)    | -440.8(14)  | 22.7(6)  |
| C24_2  | -256(3)    | 8147(2)    | -899.0(15)  | 28.7(7)  |
| C25_2  | 297(3)     | 8703(2)    | -1282.2(15) | 30.4(7)  |
| C26_2  | 1478(3)    | 8581(2)    | -1215.4(15) | 26.1(6)  |
| C27_2  | 2110(2)    | 7915.7(19) | -758.8(13)  | 19.1(5)  |
| C28_2  | 4757(2)    | 8272.7(17) | 366.6(13)   | 14.6(5)  |
| C30_2  | 6160(2)    | 8270.2(19) | -328.5(14)  | 19.5(5)  |
| C31_2  | 5850(2)    | 8445.1(19) | -1095.9(14) | 21.9(6)  |
| C32_2  | 4375(3)    | 8582(3)    | -2126.2(16) | 41.3(8)  |
| C33A_2 | 5802(4)    | 5953(3)    | -1551.6(18) | 45.6(9)  |
| C34A_2 | 4683(4)    | 5587(3)    | -1965(2)    | 57.0(11) |
| C35A_2 | 7821(4)    | 6056(5)    | -1437(3)    | 80.5(17) |
| C36A_2 | 8675(4)    | 5818(4)    | -1843(2)    | 59.2(11) |

**Table 2:** Anisotropic Displacement Parameters ( $\times 10^4$ ) **dp062**. The anisotropic displacement factor exponent takes the form:  $-2\pi^2[h^2a^{*2} \times U_{11} + \dots + 2hka^* \times b^* \times U_{12}]$

| Atom  | $U_{11}$ | $U_{22}$ | $U_{33}$ | $U_{23}$ | $U_{13}$ | $U_{12}$ |
|-------|----------|----------|----------|----------|----------|----------|
| C35A  | 52(8)    | 48(11)   | 86(15)   | 23(9)    | 20(8)    | 1(7)     |
| C36A  | 45(6)    | 58(8)    | 52(6)    | 17(5)    | 15(5)    | -3(5)    |
| F1_1  | 23.0(8)  | 32.7(9)  | 17.3(7)  | 8.3(6)   | 6.6(6)   | -3.0(7)  |
| O2_1  | 23.5(9)  | 13.3(9)  | 37.4(11) | 1.7(8)   | 9.6(9)   | -5.5(8)  |
| O3_1  | 21.6(9)  | 32.1(11) | 20.8(10) | 7.2(8)   | 6.3(8)   | -3.2(8)  |
| O4_1  | 27.2(10) | 41.9(13) | 31.2(11) | 12.0(10) | 11.6(9)  | -7.6(10) |
| O5_1  | 86(2)    | 46.3(19) | 122(3)   | 37(2)    | 36(2)    | 27.2(17) |
| O6_1  | 63.3(17) | 45.2(15) | 52.9(16) | 11.4(13) | 17.0(14) | 5.9(13)  |
| N1_1  | 11.4(9)  | 8.5(9)   | 17.6(10) | -0.3(8)  | 2.4(8)   | -0.4(8)  |
| N8_1  | 14.1(10) | 12.5(11) | 28.1(12) | -2.4(9)  | 4.1(9)   | 1.4(9)   |
| N29_1 | 18.6(11) | 15.8(11) | 19.5(11) | 1.8(8)   | 8.7(9)   | -4.0(9)  |
| C2_1  | 14.0(11) | 8.9(11)  | 19.5(12) | -0.6(9)  | 4.5(10)  | -0.8(9)  |
| C3_1  | 15.1(12) | 16.1(13) | 17.7(12) | -3.1(10) | 4.6(10)  | -2.7(10) |
| C3A_1 | 16.7(12) | 18.4(13) | 13.0(11) | 3.7(10)  | 4.1(9)   | 0.0(10)  |
| C4_1  | 18.0(13) | 25.1(14) | 23.8(14) | 3.3(11)  | 1.5(11)  | 0.0(11)  |
| C4A_1 | 15.8(12) | 17.3(12) | 19.7(12) | 6.2(10)  | 3.1(10)  | -1.2(10) |
| C5_1  | 15.0(12) | 28.3(15) | 34.9(16) | 5.7(13)  | 0.0(12)  | -1.6(11) |
| C6_1  | 14.4(13) | 26.6(16) | 46.3(18) | 6.6(13)  | 8.7(13)  | 4.0(11)  |
| C7_1  | 18.7(13) | 20.7(14) | 37.9(16) | 1.4(12)  | 8.3(12)  | 4.7(11)  |
| C7A_1 | 15.0(12) | 12.3(12) | 26.8(13) | 6.5(10)  | 4.4(10)  | 1.6(9)   |
| C8A_1 | 15.1(12) | 10.6(11) | 19.2(12) | 1.8(10)  | 4.4(10)  | 0.0(9)   |
| C9_1  | 10.9(11) | 11.6(12) | 16.7(12) | 0.5(9)   | 2.8(9)   | 1.3(9)   |
| C10_1 | 14.3(11) | 11.4(12) | 16.5(12) | 2.2(9)   | 2.0(9)   | -1.0(9)  |
| C11_1 | 16.4(12) | 15.4(12) | 19.7(12) | -1.3(10) | 2.8(10)  | -1.0(10) |
| C12_1 | 25.1(14) | 18.1(13) | 23.7(14) | -3.8(11) | 5.3(11)  | 4.1(11)  |
| C13_1 | 29.6(14) | 14.0(13) | 24.4(14) | -4.4(11) | -0.8(12) | -3.0(11) |
| C14_1 | 21.4(13) | 19.7(13) | 26.7(14) | -0.4(11) | 1.7(11)  | -8.2(11) |
| C15_1 | 18.6(12) | 15.8(12) | 20.7(12) | -0.6(10) | 5.2(10)  | -1.5(10) |
| C16_1 | 8.5(10)  | 15.0(12) | 16.0(12) | 1.5(9)   | 1.9(9)   | 0.7(9)   |
| C17_1 | 12.1(11) | 14.8(12) | 18.7(12) | 0.8(10)  | 2.2(10)  | 0.6(9)   |
| C18_1 | 12.0(11) | 22.0(13) | 19.2(12) | 6.0(10)  | 2.6(10)  | 1.4(10)  |
| C19_1 | 13.7(12) | 29.0(14) | 13.7(12) | -0.3(10) | 2.8(10)  | 2.0(10)  |
| C20_1 | 13.2(11) | 18.8(13) | 20.3(13) | -2.4(10) | 2.9(10)  | 2.2(10)  |
| C21_1 | 11.2(11) | 14.0(12) | 18.4(12) | 0.6(9)   | 3.1(9)   | 2.0(9)   |
| C22_1 | 18.8(12) | 9.8(11)  | 13.2(12) | -2.0(9)  | 1.4(10)  | -0.7(9)  |
| C23_1 | 18.9(12) | 17.7(13) | 18.1(12) | 1.7(10)  | 3.3(10)  | 2.6(10)  |
| C24_1 | 21.9(13) | 19.8(13) | 21.0(13) | -1.5(10) | 2.0(11)  | 7.0(11)  |
| C25_1 | 32.3(15) | 19.1(13) | 16.3(12) | 2.8(10)  | 0.1(11)  | 5.8(11)  |
| C26_1 | 30.2(15) | 19.0(13) | 16.9(13) | 2.2(10)  | 7.0(11)  | -2.3(11) |
| C27_1 | 19.2(12) | 16.7(13) | 16.3(12) | -1.3(10) | 4.7(10)  | -1.0(10) |
| C28_1 | 15.2(12) | 14.0(12) | 18.6(12) | 2.7(10)  | 2.0(10)  | -1.5(9)  |
| C30_1 | 17.0(12) | 25.1(14) | 23.5(13) | 4.0(11)  | 8.5(11)  | 0.2(11)  |
| C31_1 | 20.6(13) | 19.7(13) | 23.1(13) | 0.8(11)  | 10.3(11) | -2.0(11) |
| C32_1 | 28.1(15) | 42.9(18) | 20.7(14) | 11.3(13) | 4.7(12)  | 0.2(13)  |
| C33_1 | 64(3)    | 47(2)    | 50(2)    | 1.6(19)  | 18(2)    | 9(2)     |
| C34_1 | 62(3)    | 69(3)    | 83(3)    | 23(3)    | 3(3)     | -7(2)    |
| C35_1 | 50(5)    | 50(7)    | 38(5)    | 19(4)    | 18(4)    | -2(4)    |
| C36_1 | 62(5)    | 53(5)    | 62(5)    | 13(3)    | 19(4)    | 2(4)     |
| F1_2  | 23.0(8)  | 21.0(8)  | 17.3(7)  | 7.2(6)   | 5.3(6)   | -1.5(6)  |

| Atom   | $U_{11}$ | $U_{22}$ | $U_{33}$ | $U_{23}$  | $U_{13}$ | $U_{12}$  |
|--------|----------|----------|----------|-----------|----------|-----------|
| O2_2   | 26.2(10) | 12.0(9)  | 23.1(9)  | 0.4(7)    | 6.3(8)   | -4.2(7)   |
| O3_2   | 28.7(10) | 36.4(12) | 22.4(10) | 7.7(9)    | 2.7(8)   | -1.7(9)   |
| O4_2   | 36.4(12) | 42.8(13) | 26.5(11) | 3.2(10)   | 14.7(9)  | -11.0(10) |
| O4A_2  | 124(3)   | 41.5(16) | 45.4(16) | -9.8(13)  | 29.6(18) | 4.1(18)   |
| O5A_2  | 57.3(16) | 71(2)    | 38.3(14) | -22.4(14) | 13.9(13) | -2.0(15)  |
| N1_2   | 12.0(10) | 8.4(9)   | 16.5(10) | -0.7(8)   | 2.8(8)   | -0.9(8)   |
| N8_2   | 15.7(10) | 14.1(11) | 21.2(11) | -5.1(9)   | 4.3(9)   | 1.0(9)    |
| N29_2  | 18.7(11) | 11.0(10) | 19.6(11) | 1.5(9)    | 6.6(9)   | -3.3(9)   |
| C2_2   | 13.7(11) | 9.9(11)  | 16.2(12) | -1.2(9)   | 3.6(10)  | -0.5(9)   |
| C3_2   | 15.0(12) | 15.7(12) | 14.7(12) | -2.1(9)   | 4.1(10)  | -1.1(10)  |
| C3A_2  | 16.1(12) | 13.8(12) | 12.4(11) | 2.2(9)    | 2.2(9)   | -1.5(9)   |
| C4_2   | 18.8(13) | 16.6(12) | 20.8(13) | 2.4(10)   | 0.4(11)  | 0.6(10)   |
| C4A_2  | 14.9(12) | 13.4(11) | 16.9(12) | 3.1(9)    | 2.7(10)  | 1.5(9)    |
| C5_2   | 14.8(13) | 20.4(14) | 29.3(14) | 7.5(11)   | -0.7(11) | -0.2(10)  |
| C6_2   | 14.5(12) | 22.0(14) | 32.0(15) | 9.8(11)   | 7.3(11)  | 3.3(10)   |
| C7_2   | 19.0(12) | 21.1(13) | 23.7(13) | 3.1(11)   | 8.4(11)  | 6.7(10)   |
| C7A_2  | 15.3(12) | 10.7(11) | 20.9(12) | 3.2(10)   | 2.0(10)  | 1.5(9)    |
| C8A_2  | 14.5(11) | 9.0(11)  | 17.4(12) | 0.1(9)    | 4.2(10)  | 0.9(9)    |
| C9_2   | 11.4(11) | 13.4(12) | 17.0(12) | -0.8(9)   | 4.3(10)  | -0.6(9)   |
| C10_2  | 15.4(11) | 13.2(12) | 18.0(12) | 1.0(10)   | 0.9(10)  | 0.2(10)   |
| C11_2  | 18.5(12) | 17.4(13) | 19.9(12) | -4.3(10)  | 2.8(10)  | 0.1(10)   |
| C12_2  | 27.5(14) | 24.2(14) | 26.0(14) | -9.6(11)  | 2.6(12)  | 3.6(12)   |
| C13_2  | 40.4(17) | 18.5(14) | 31.9(16) | -9.5(12)  | -3.2(14) | -5.6(13)  |
| C14_2  | 37.2(17) | 28.6(16) | 36.4(17) | -6.7(13)  | 4.6(14)  | -18.7(14) |
| C15_2  | 25.7(14) | 26.2(15) | 27.1(14) | -4.4(12)  | 5.7(12)  | -12.4(12) |
| C16_2  | 9.9(11)  | 18.7(12) | 16.3(12) | -1.3(10)  | 3.2(10)  | -3.2(9)   |
| C17_2  | 13.6(11) | 18.9(13) | 23.5(13) | 0.2(10)   | 4.9(10)  | -4.0(10)  |
| C18_2  | 18.4(12) | 26.0(14) | 22.7(13) | 6.5(11)   | 4.3(11)  | -5.8(11)  |
| C19_2  | 15.3(12) | 35.3(16) | 17.8(13) | -2.1(11)  | 4.7(10)  | -7.7(11)  |
| C20_2  | 14.4(12) | 26.5(14) | 21.7(13) | -4.6(11)  | 6.0(10)  | -2.1(10)  |
| C21_2  | 10.8(11) | 20.9(13) | 19.1(12) | -1.4(10)  | 2.3(10)  | -1.0(10)  |
| C22_2  | 18.6(12) | 13.8(12) | 13.9(11) | -3.7(9)   | 1.3(10)  | 1.9(10)   |
| C23_2  | 18.2(13) | 29.0(15) | 19.5(13) | -2.6(11)  | 2.5(11)  | 2.6(11)   |
| C24_2  | 20.6(13) | 36.0(17) | 25.0(14) | -2.9(12)  | -1.7(12) | 13.7(12)  |
| C25_2  | 36.3(16) | 26.4(15) | 23.5(15) | 3.2(12)   | -0.7(13) | 12.0(13)  |
| C26_2  | 33.7(15) | 20.2(14) | 21.9(14) | 3.4(11)   | 3.3(12)  | 2.4(12)   |
| C27_2  | 19.6(13) | 15.9(12) | 19.9(13) | -0.1(10)  | 2.0(10)  | 0.1(10)   |
| C28_2  | 15.9(11) | 10.9(11) | 14.7(11) | 2.6(9)    | 0.3(9)   | 0.9(9)    |
| C30_2  | 18.0(12) | 18.7(13) | 23.2(13) | 2.0(10)   | 8.0(11)  | -2.6(10)  |
| C31_2  | 25.2(13) | 17.6(13) | 23.7(14) | 1.2(11)   | 8.0(11)  | -4.4(11)  |
| C32_2  | 48(2)    | 47(2)    | 22.7(15) | 7.9(14)   | -1.1(14) | -8.1(17)  |
| C33A_2 | 78(3)    | 35.0(19) | 29.0(17) | -7.7(14)  | 23.9(18) | 0.5(18)   |
| C34A_2 | 66(3)    | 66(3)    | 49(2)    | -4(2)     | 32(2)    | 12(2)     |
| C35A_2 | 64(3)    | 123(5)   | 49(3)    | -27(3)    | 6(2)     | -22(3)    |
| C36A_2 | 43(2)    | 82(3)    | 43(2)    | -12(2)    | -3.5(17) | -5(2)     |

**Table 3:** Bond Lengths in Å for **dp062**.

| Atom  | Atom  | Length/Å  |
|-------|-------|-----------|
| C35A  | C36A  | 1.464(17) |
| C35A  | O6_1  | 1.492(11) |
| F1_1  | C3A_1 | 1.418(3)  |
| O2_1  | C28_1 | 1.228(3)  |
| O3_1  | C31_1 | 1.327(3)  |
| O3_1  | C32_1 | 1.447(3)  |
| O4_1  | C31_1 | 1.204(3)  |
| O5_1  | C33_1 | 1.219(5)  |
| O6_1  | C33_1 | 1.301(5)  |
| O6_1  | C35_1 | 1.484(8)  |
| N1_1  | C2_1  | 1.477(3)  |
| N1_1  | C8A_1 | 1.477(3)  |
| N1_1  | C9_1  | 1.499(3)  |
| N8_1  | C7A_1 | 1.391(3)  |
| N8_1  | C8A_1 | 1.472(3)  |
| N29_1 | C28_1 | 1.338(4)  |
| N29_1 | C30_1 | 1.446(3)  |
| C2_1  | C3_1  | 1.536(3)  |
| C2_1  | C28_1 | 1.527(3)  |
| C3_1  | C3A_1 | 1.518(4)  |
| C3A_1 | C4A_1 | 1.498(4)  |
| C3A_1 | C8A_1 | 1.558(3)  |
| C4_1  | C4A_1 | 1.386(4)  |
| C4_1  | C5_1  | 1.391(4)  |
| C4A_1 | C7A_1 | 1.393(4)  |
| C5_1  | C6_1  | 1.387(5)  |
| C6_1  | C7_1  | 1.390(4)  |
| C7_1  | C7A_1 | 1.395(4)  |
| C9_1  | C10_1 | 1.545(3)  |
| C9_1  | C16_1 | 1.540(3)  |
| C9_1  | C22_1 | 1.540(3)  |
| C10_1 | C11_1 | 1.390(4)  |
| C10_1 | C15_1 | 1.395(4)  |
| C11_1 | C12_1 | 1.390(4)  |
| C12_1 | C13_1 | 1.385(4)  |
| C13_1 | C14_1 | 1.389(4)  |
| C14_1 | C15_1 | 1.385(4)  |
| C16_1 | C17_1 | 1.400(4)  |
| C16_1 | C21_1 | 1.398(4)  |
| C17_1 | C18_1 | 1.389(4)  |
| C18_1 | C19_1 | 1.386(4)  |
| C19_1 | C20_1 | 1.379(4)  |
| C20_1 | C21_1 | 1.389(4)  |
| C22_1 | C23_1 | 1.396(4)  |
| C22_1 | C27_1 | 1.397(4)  |
| C23_1 | C24_1 | 1.391(4)  |
| C24_1 | C25_1 | 1.387(4)  |
| C25_1 | C26_1 | 1.381(4)  |
| C26_1 | C27_1 | 1.391(4)  |
| C30_1 | C31_1 | 1.512(4)  |



| Atom   | Atom   | Length/Å  |
|--------|--------|-----------|
| C33_1  | C34_1  | 1.515(7)  |
| C35_1  | C36_1  | 1.456(15) |
| F1_2   | C3A_2  | 1.415(3)  |
| O2_2   | C28_2  | 1.237(3)  |
| O3_2   | C31_2  | 1.329(4)  |
| O3_2   | C32_2  | 1.443(4)  |
| O4_2   | C31_2  | 1.210(3)  |
| O4A_2  | C33A_2 | 1.204(4)  |
| O5A_2  | C33A_2 | 1.315(5)  |
| O5A_2  | C35A_2 | 1.420(6)  |
| N1_2   | C2_2   | 1.475(3)  |
| N1_2   | C8A_2  | 1.478(3)  |
| N1_2   | C9_2   | 1.504(3)  |
| N8_2   | C7A_2  | 1.383(3)  |
| N8_2   | C8A_2  | 1.460(3)  |
| N29_2  | C28_2  | 1.332(3)  |
| N29_2  | C30_2  | 1.445(3)  |
| C2_2   | C3_2   | 1.544(3)  |
| C2_2   | C28_2  | 1.530(3)  |
| C3_2   | C3A_2  | 1.515(4)  |
| C3A_2  | C4A_2  | 1.495(3)  |
| C3A_2  | C8A_2  | 1.561(3)  |
| C4_2   | C4A_2  | 1.390(4)  |
| C4_2   | C5_2   | 1.391(4)  |
| C4A_2  | C7A_2  | 1.395(4)  |
| C5_2   | C6_2   | 1.384(4)  |
| C6_2   | C7_2   | 1.391(4)  |
| C7_2   | C7A_2  | 1.397(4)  |
| C9_2   | C10_2  | 1.535(3)  |
| C9_2   | C16_2  | 1.545(3)  |
| C9_2   | C22_2  | 1.545(3)  |
| C10_2  | C11_2  | 1.393(4)  |
| C10_2  | C15_2  | 1.395(4)  |
| C11_2  | C12_2  | 1.395(4)  |
| C12_2  | C13_2  | 1.376(5)  |
| C13_2  | C14_2  | 1.373(5)  |
| C14_2  | C15_2  | 1.392(4)  |
| C16_2  | C17_2  | 1.402(4)  |
| C16_2  | C21_2  | 1.393(4)  |
| C17_2  | C18_2  | 1.391(4)  |
| C18_2  | C19_2  | 1.384(4)  |
| C19_2  | C20_2  | 1.390(4)  |
| C20_2  | C21_2  | 1.388(4)  |
| C22_2  | C23_2  | 1.399(4)  |
| C22_2  | C27_2  | 1.393(4)  |
| C23_2  | C24_2  | 1.391(4)  |
| C24_2  | C25_2  | 1.383(5)  |
| C25_2  | C26_2  | 1.382(4)  |
| C26_2  | C27_2  | 1.388(4)  |
| C30_2  | C31_2  | 1.509(4)  |
| C33A_2 | C34A_2 | 1.461(6)  |

| Atom   | Atom   | Length/Å |
|--------|--------|----------|
| C35A_2 | C36A_2 | 1.500(7) |

**Table 4:** Bond Angles in ° for **dp062**.

| Atom  | Atom  | Atom  | Angle/°    |
|-------|-------|-------|------------|
| C36A  | C35A  | O6_1  | 104.2(12)  |
| C31_1 | O3_1  | C32_1 | 115.2(2)   |
| C33_1 | O6_1  | C35A  | 107.8(10)  |
| C33_1 | O6_1  | C35_1 | 119.6(7)   |
| C2_1  | N1_1  | C9_1  | 115.69(18) |
| C8A_1 | N1_1  | C2_1  | 107.78(18) |
| C8A_1 | N1_1  | C9_1  | 115.99(19) |
| C7A_1 | N8_1  | C8A_1 | 110.2(2)   |
| C28_1 | N29_1 | C30_1 | 120.7(2)   |
| N1_1  | C2_1  | C3_1  | 106.89(19) |
| N1_1  | C2_1  | C28_1 | 113.0(2)   |
| C28_1 | C2_1  | C3_1  | 109.4(2)   |
| C3A_1 | C3_1  | C2_1  | 103.6(2)   |
| F1_1  | C3A_1 | C3_1  | 109.6(2)   |
| F1_1  | C3A_1 | C4A_1 | 109.3(2)   |
| F1_1  | C3A_1 | C8A_1 | 110.0(2)   |
| C3_1  | C3A_1 | C8A_1 | 106.1(2)   |
| C4A_1 | C3A_1 | C3_1  | 117.1(2)   |
| C4A_1 | C3A_1 | C8A_1 | 104.3(2)   |
| C4A_1 | C4_1  | C5_1  | 118.4(3)   |
| C4_1  | C4A_1 | C3A_1 | 129.7(3)   |
| C4_1  | C4A_1 | C7A_1 | 121.3(2)   |
| C7A_1 | C4A_1 | C3A_1 | 108.9(2)   |
| C6_1  | C5_1  | C4_1  | 120.1(3)   |
| C5_1  | C6_1  | C7_1  | 122.1(3)   |
| C6_1  | C7_1  | C7A_1 | 117.5(3)   |
| N8_1  | C7A_1 | C4A_1 | 111.6(2)   |
| N8_1  | C7A_1 | C7_1  | 127.6(3)   |
| C4A_1 | C7A_1 | C7_1  | 120.6(3)   |
| N1_1  | C8A_1 | C3A_1 | 107.0(2)   |
| N8_1  | C8A_1 | N1_1  | 112.0(2)   |
| N8_1  | C8A_1 | C3A_1 | 104.63(19) |
| N1_1  | C9_1  | C10_1 | 109.27(19) |
| N1_1  | C9_1  | C16_1 | 109.26(19) |
| N1_1  | C9_1  | C22_1 | 109.88(19) |
| C16_1 | C9_1  | C10_1 | 112.7(2)   |
| C16_1 | C9_1  | C22_1 | 112.41(19) |
| C22_1 | C9_1  | C10_1 | 103.13(18) |
| C11_1 | C10_1 | C9_1  | 121.8(2)   |
| C11_1 | C10_1 | C15_1 | 118.4(2)   |
| C15_1 | C10_1 | C9_1  | 119.4(2)   |
| C12_1 | C11_1 | C10_1 | 120.6(2)   |
| C13_1 | C12_1 | C11_1 | 120.7(3)   |
| C12_1 | C13_1 | C14_1 | 119.0(2)   |
| C15_1 | C14_1 | C13_1 | 120.4(3)   |

| Atom   | Atom  | Atom   | Angle/°    |
|--------|-------|--------|------------|
| C14_1  | C15_1 | C10_1  | 120.9(2)   |
| C17_1  | C16_1 | C9_1   | 122.7(2)   |
| C21_1  | C16_1 | C9_1   | 119.6(2)   |
| C21_1  | C16_1 | C17_1  | 117.4(2)   |
| C18_1  | C17_1 | C16_1  | 121.0(2)   |
| C19_1  | C18_1 | C17_1  | 120.4(2)   |
| C20_1  | C19_1 | C18_1  | 119.7(2)   |
| C19_1  | C20_1 | C21_1  | 120.0(2)   |
| C20_1  | C21_1 | C16_1  | 121.6(2)   |
| C23_1  | C22_1 | C9_1   | 120.4(2)   |
| C23_1  | C22_1 | C27_1  | 118.2(2)   |
| C27_1  | C22_1 | C9_1   | 121.0(2)   |
| C24_1  | C23_1 | C22_1  | 121.2(2)   |
| C25_1  | C24_1 | C23_1  | 119.9(3)   |
| C26_1  | C25_1 | C24_1  | 119.6(2)   |
| C25_1  | C26_1 | C27_1  | 120.7(2)   |
| C26_1  | C27_1 | C22_1  | 120.5(2)   |
| O2_1   | C28_1 | N29_1  | 122.8(2)   |
| O2_1   | C28_1 | C2_1   | 119.9(2)   |
| N29_1  | C28_1 | C2_1   | 117.2(2)   |
| N29_1  | C30_1 | C31_1  | 114.4(2)   |
| O3_1   | C31_1 | C30_1  | 112.4(2)   |
| O4_1   | C31_1 | O3_1   | 124.8(3)   |
| O4_1   | C31_1 | C30_1  | 122.8(3)   |
| O5_1   | C33_1 | O6_1   | 121.4(4)   |
| O5_1   | C33_1 | C34_1  | 127.2(5)   |
| O6_1   | C33_1 | C34_1  | 111.4(4)   |
| C36_1  | C35_1 | O6_1   | 111.0(10)  |
| C31_2  | O3_2  | C32_2  | 114.9(2)   |
| C33A_2 | O5A_2 | C35A_2 | 118.2(3)   |
| C2_2   | N1_2  | C8A_2  | 107.97(18) |
| C2_2   | N1_2  | C9_2   | 114.78(19) |
| C8A_2  | N1_2  | C9_2   | 115.76(18) |
| C7A_2  | N8_2  | C8A_2  | 110.4(2)   |
| C28_2  | N29_2 | C30_2  | 123.1(2)   |
| N1_2   | C2_2  | C3_2   | 106.37(19) |
| N1_2   | C2_2  | C28_2  | 114.00(19) |
| C28_2  | C2_2  | C3_2   | 109.7(2)   |
| C3A_2  | C3_2  | C2_2   | 103.50(19) |
| F1_2   | C3A_2 | C3_2   | 108.95(19) |
| F1_2   | C3A_2 | C4A_2  | 109.52(19) |
| F1_2   | C3A_2 | C8A_2  | 110.25(19) |
| C3_2   | C3A_2 | C8A_2  | 106.01(19) |
| C4A_2  | C3A_2 | C3_2   | 118.1(2)   |
| C4A_2  | C3A_2 | C8A_2  | 103.7(2)   |
| C5_2   | C4_2  | C4A_2  | 118.1(3)   |
| C4_2   | C4A_2 | C3A_2  | 129.5(2)   |
| C4_2   | C4A_2 | C7A_2  | 121.4(2)   |
| C7A_2  | C4A_2 | C3A_2  | 109.1(2)   |
| C6_2   | C5_2  | C4_2   | 120.5(3)   |
| C5_2   | C6_2  | C7_2   | 121.9(2)   |

| Atom  | Atom   | Atom   | Angle/°    |
|-------|--------|--------|------------|
| C6_2  | C7_2   | C7A_2  | 117.8(3)   |
| N8_2  | C7A_2  | C4A_2  | 111.4(2)   |
| N8_2  | C7A_2  | C7_2   | 128.1(2)   |
| C4A_2 | C7A_2  | C7_2   | 120.3(2)   |
| N1_2  | C8A_2  | C3A_2  | 106.80(19) |
| N8_2  | C8A_2  | N1_2   | 112.0(2)   |
| N8_2  | C8A_2  | C3A_2  | 104.96(19) |
| N1_2  | C9_2   | C10_2  | 108.98(19) |
| N1_2  | C9_2   | C16_2  | 109.08(19) |
| N1_2  | C9_2   | C22_2  | 108.99(19) |
| C10_2 | C9_2   | C16_2  | 113.7(2)   |
| C10_2 | C9_2   | C22_2  | 103.88(19) |
| C22_2 | C9_2   | C16_2  | 112.0(2)   |
| C11_2 | C10_2  | C9_2   | 119.7(2)   |
| C11_2 | C10_2  | C15_2  | 118.2(2)   |
| C15_2 | C10_2  | C9_2   | 121.7(2)   |
| C10_2 | C11_2  | C12_2  | 120.5(3)   |
| C13_2 | C12_2  | C11_2  | 120.6(3)   |
| C14_2 | C13_2  | C12_2  | 119.2(3)   |
| C13_2 | C14_2  | C15_2  | 121.0(3)   |
| C14_2 | C15_2  | C10_2  | 120.3(3)   |
| C17_2 | C16_2  | C9_2   | 121.2(2)   |
| C21_2 | C16_2  | C9_2   | 120.6(2)   |
| C21_2 | C16_2  | C17_2  | 117.7(2)   |
| C18_2 | C17_2  | C16_2  | 120.8(3)   |
| C19_2 | C18_2  | C17_2  | 120.6(3)   |
| C18_2 | C19_2  | C20_2  | 119.2(2)   |
| C21_2 | C20_2  | C19_2  | 120.0(3)   |
| C20_2 | C21_2  | C16_2  | 121.6(3)   |
| C23_2 | C22_2  | C9_2   | 120.0(2)   |
| C27_2 | C22_2  | C9_2   | 121.9(2)   |
| C27_2 | C22_2  | C23_2  | 117.9(2)   |
| C24_2 | C23_2  | C22_2  | 120.7(3)   |
| C25_2 | C24_2  | C23_2  | 120.3(3)   |
| C26_2 | C25_2  | C24_2  | 119.6(3)   |
| C25_2 | C26_2  | C27_2  | 120.2(3)   |
| C26_2 | C27_2  | C22_2  | 121.2(3)   |
| O2_2  | C28_2  | N29_2  | 124.3(2)   |
| O2_2  | C28_2  | C2_2   | 118.4(2)   |
| N29_2 | C28_2  | C2_2   | 117.2(2)   |
| N29_2 | C30_2  | C31_2  | 115.1(2)   |
| O3_2  | C31_2  | C30_2  | 113.2(2)   |
| O4_2  | C31_2  | O3_2   | 124.7(3)   |
| O4_2  | C31_2  | C30_2  | 122.1(3)   |
| O4A_2 | C33A_2 | O5A_2  | 124.0(4)   |
| O4A_2 | C33A_2 | C34A_2 | 122.5(4)   |
| O5A_2 | C33A_2 | C34A_2 | 113.4(3)   |
| O5A_2 | C35A_2 | C36A_2 | 109.5(4)   |

**Table 5:** Hydrogen Fractional Atomic Coordinates ( $\times 10^4$ ) and Equivalent Isotropic Displacement Parameters ( $\text{\AA}^2 \times 10^3$ ) for **dp062**.  $U_{eq}$  is defined as 1/3 of the trace of the orthogonalised  $U_{ij}$ .

| Atom   | x         | y        | z        | $U_{eq}$ |
|--------|-----------|----------|----------|----------|
| H35A   | 10233.26  | 1566.05  | 3221.47  | 74       |
| H35B   | 10223.57  | 2148.44  | 3907.84  | 74       |
| H36A   | 8943.43   | 2643.74  | 2553.48  | 77       |
| H36B   | 8960.54   | 3256.42  | 3224.38  | 77       |
| H36C   | 8380.29   | 2227.98  | 3131.64  | 77       |
| H2_1   | 8266.36   | 4995.91  | 5494.75  | 17       |
| H3A_1  | 10163.52  | 4910.62  | 6503.18  | 20       |
| H3B_1  | 8927.81   | 4587.74  | 6621.18  | 20       |
| H4_1   | 12193.92  | 4112.83  | 7169.93  | 28       |
| H5_1   | 13967.78  | 3622.72  | 6967.97  | 33       |
| H6_1   | 13966.76  | 2503.15  | 6125.32  | 35       |
| H7_1   | 12218.31  | 1866.94  | 5438.74  | 31       |
| H8A_1  | 8657.8    | 2423.16  | 5964.87  | 18       |
| H11_1  | 8286.65   | 2324.57  | 4474.5   | 21       |
| H12_1  | 7652.81   | 957.13   | 3840.25  | 27       |
| H13_1  | 5799.93   | 333.59   | 3770.97  | 29       |
| H14_1  | 4549.52   | 1137.57  | 4303.32  | 28       |
| H15_1  | 5187.14   | 2490.86  | 4949.12  | 22       |
| H17_1  | 6708.02   | 2149.52  | 6054.57  | 19       |
| H18_1  | 6300.42   | 2317.82  | 7118.54  | 22       |
| H19_1  | 6227.6    | 3816.73  | 7589.28  | 23       |
| H20_1  | 6444.12   | 5153.88  | 6958.56  | 21       |
| H21_1  | 6766.57   | 4993.81  | 5872.93  | 18       |
| H23_1  | 5065.04   | 4317.78  | 4935.68  | 22       |
| H24_1  | 4049.55   | 5293.97  | 4041.15  | 26       |
| H25_1  | 4936.88   | 5785.56  | 3190.99  | 29       |
| H26_1  | 6846.77   | 5321     | 3255.33  | 26       |
| H27_1  | 7860.32   | 4327.66  | 4138.87  | 21       |
| H30A_1 | 11678.49  | 3938.99  | 4527.18  | 26       |
| H30B_1 | 11820.11  | 4916.32  | 4937.88  | 26       |
| H32A_1 | 9829.75   | 5228.22  | 2642.93  | 46       |
| H32B_1 | 9473.9    | 6124.09  | 3027.54  | 46       |
| H32C_1 | 8543.33   | 5300.44  | 2750.36  | 46       |
| H34A_1 | 13018.98  | 3640.72  | 3409.13  | 112      |
| H34B_1 | 12693.72  | 3094.16  | 2686.82  | 112      |
| H34C_1 | 13693.42  | 2689.07  | 3322.43  | 112      |
| H35A_1 | 10284.85  | 1947.96  | 3805.6   | 53       |
| H35B_1 | 9522.38   | 2885.3   | 3579.74  | 53       |
| H36A_1 | 9058.23   | 2359.79  | 2436.49  | 88       |
| H36B_1 | 8591.93   | 1659.06  | 2928.05  | 88       |
| H36C_1 | 9745.25   | 1399.33  | 2697.27  | 88       |
| H29_1  | 10030(30) | 3700(30) | 4864(17) | 23(8)    |
| H8_1   | 9810(30)  | 1840(30) | 5325(19) | 33(9)    |
| H2_2   | 3207.17   | 8077.07  | 648.18   | 16       |
| H3A_2  | 5124.44   | 7885.78  | 1632.54  | 18       |
| H3B_2  | 3938.71   | 7375.86  | 1690.09  | 18       |
| H4_2   | 7275.71   | 7115.44  | 2154.04  | 24       |
| H5_2   | 9058.55   | 6892.43  | 1874.14  | 27       |

| Atom   | x        | y        | z        | <i>U</i> <sub>eq</sub> |
|--------|----------|----------|----------|------------------------|
| H6_2   | 9114.85  | 6064.76  | 890.4    | 27                     |
| H7_2   | 7405.16  | 5470.9   | 133.55   | 25                     |
| H8A_2  | 3867.36  | 5476.43  | 732.95   | 16                     |
| H11_2  | 3219.96  | 5882.68  | -818.57  | 23                     |
| H12_2  | 2710.03  | 4582.06  | -1551.63 | 32                     |
| H13_2  | 1173.11  | 3600.84  | -1480.78 | 39                     |
| H14_2  | 159.21   | 3909.37  | -664.83  | 42                     |
| H15_2  | 627.33   | 5216.17  | 61.84    | 32                     |
| H17_2  | 2288.59  | 5159.56  | 1040.63  | 22                     |
| H18_2  | 2012.46  | 5170.71  | 2144.57  | 27                     |
| H19_2  | 1413.44  | 6546.67  | 2591.69  | 27                     |
| H20_2  | 1112.46  | 7928.8   | 1925.55  | 25                     |
| H21_2  | 1423.07  | 7927.8   | 831.76   | 21                     |
| H23_2  | -14.33   | 7098.03  | -183.1   | 27                     |
| H24_2  | -1070.31 | 8221.38  | -949.09  | 34                     |
| H25_2  | -132.88  | 9165.24  | -1589.36 | 36                     |
| H26_2  | 1859.34  | 8954.03  | -1482.92 | 31                     |
| H27_2  | 2919.54  | 7834.34  | -720.66  | 23                     |
| H30A_2 | 6855.26  | 7854.35  | -202.77  | 23                     |
| H30B_2 | 6379.69  | 8879.82  | -88.05   | 23                     |
| H32A_2 | 4678.52  | 8068.39  | -2355.51 | 62                     |
| H32B_2 | 4700.87  | 9184.27  | -2227.12 | 62                     |
| H32C_2 | 3519.8   | 8600.88  | -2295.17 | 62                     |
| H34A_2 | 4669.83  | 5602.31  | -2454.44 | 86                     |
| H34B_2 | 4045.66  | 5977.65  | -1891.56 | 86                     |
| H34C_2 | 4583.82  | 4934.85  | -1828.08 | 86                     |
| H35A_2 | 8067.64  | 5754.59  | -977.26  | 97                     |
| H35B_2 | 7801.39  | 6747.77  | -1371.48 | 97                     |
| H36A_2 | 8441     | 6134.5   | -2292.29 | 89                     |
| H36B_2 | 8683.46  | 5133.2   | -1912.16 | 89                     |
| H36C_2 | 9458.32  | 6030.69  | -1590.68 | 89                     |
| H8_2   | 5060(30) | 5340(30) | 60(20)   | 33(10)                 |
| H29_2  | 5050(30) | 7300(30) | -183(16) | 15(7)                  |

**Table 6:** Hydrogen Bond information for **dp062**.

| D     | H     | A                 | d(D-H)/Å | d(H-A)/Å | d(D-A)/Å | D-H-A/deg |
|-------|-------|-------------------|----------|----------|----------|-----------|
| N29_1 | H29_1 | N8_1              | 0.87(4)  | 2.25(4)  | 2.986(3) | 143(3)    |
| N8_1  | H8_1  | O2_1 <sup>1</sup> | 0.91(4)  | 1.99(4)  | 2.842(3) | 156(3)    |
| N8_2  | H8_2  | O2_2 <sup>2</sup> | 0.75(4)  | 2.18(4)  | 2.914(3) | 169(4)    |
| N29_2 | H29_2 | N8_2              | 0.82(4)  | 2.36(3)  | 3.040(3) | 141(3)    |

<sup>1</sup>2-x,-1+y,1-z; <sup>2</sup>1-x,-1/2+y,-z

**Table 7:** Atomic Occupancies for all atoms that are not fully occupied in **dp062**.

| <b>Atom</b> | <b>Occupancy</b> |
|-------------|------------------|
| C35A        | 0.395(13)        |
| H35A        | 0.395(13)        |
| H35B        | 0.395(13)        |
| C36A        | 0.395(13)        |
| H36A        | 0.395(13)        |
| H36B        | 0.395(13)        |
| H36C        | 0.395(13)        |
| C35_1       | 0.605(13)        |
| H35A_1      | 0.605(13)        |
| H35B_1      | 0.605(13)        |
| C36_1       | 0.605(13)        |
| H36A_1      | 0.605(13)        |
| H36B_1      | 0.605(13)        |
| H36C_1      | 0.605(13)        |

## References

- O.V. Dolomanov and L.J. Bourhis and R.J. Gildea and J.A.K. Howard and H. Puschmann, Olex2: A complete structure solution, refinement and analysis program, *J. Appl. Cryst.*, (2009), **42**, 339-341.
- Parsons, S., Flack, H.D., and Wagner, T., *Acta Cryst.*, (2013), **B69** 249-259
- Sheldrick, G.M., XT, *Acta Cryst.*, (2015), **A71**, 3-8.
- Sheldrick, G.M., XL, *Acta Cryst.*, (2015), **C71**, 3-8.
- Software for the Integration of CCD Detector System Bruker Analytical X-ray Systems, Bruker Axs, Madison, WI (after 2013).
